# Supplementary material for: Uracil-Containing Heterodimers of a New Type: Synthesis and Study of Their Anti-Viral Properties
Source: MDPI journal article supplement (doi:10.3390/molecules25153350), 2020-07-23
Supplement: s1 [file s1]

Supplementary material

**URACIL-CONTAINING HETERODIMERS OF A NEW TYPE: SYNTHESIS AND STUDY OF ANTI-VIRAL PROPERTIES**

Anna A. Maslova<sup>1</sup>, Elena S. Matyugina<sup>1</sup>, Robert Snoeck<sup>2</sup>, Graciela Andrei<sup>2</sup>, Sergey N. Kochetkov<sup>1</sup>, Anastasia L. Khandzhinskaya<sup>1,\*</sup> and Mikhail S. Novikov<sup>3</sup>

<sup>1</sup> Engelhardt Institute of Molecular Biology, Russian Academy of Science, Moscow 119991, Russian Federation

<sup>2</sup> Rega Institute for Medical Research, KU Leuven, B-3000 Leuven, Belgium

<sup>3</sup> Department of Pharmaceutical & Toxicological Chemistry, Volgograd State Medical University, 400131 Volgograd, Russian Federation

\*Correspondence: khandzhinskaya@bk.ru

## Contents

|                                                                                                                      |    |
|----------------------------------------------------------------------------------------------------------------------|----|
| Figure S1. <sup>1</sup> H NMR spectrum of compound <b>4a</b> (in DMSO- <i>d</i> <sub>6</sub> at 400 MHz)             | 3  |
| Figure S2. <sup>13</sup> C NMR spectrum of compound <b>4a</b> (in DMSO- <i>d</i> <sub>6</sub> at 100 MHz)            | 4  |
| Figure S3. <sup>1</sup> H NMR spectrum of compound <b>4b</b> (in DMSO- <i>d</i> <sub>6</sub> at 400 MHz)             | 5  |
| Figure S4. <sup>13</sup> C NMR spectrum of compound <b>4b</b> (in DMSO- <i>d</i> <sub>6</sub> at 100 MHz)            | 6  |
| Figure S5. <sup>1</sup> H NMR spectrum of compound <b>4c</b> (in DMSO- <i>d</i> <sub>6</sub> at 400 MHz)             | 7  |
| Figure S6. <sup>13</sup> C NMR spectrum of compound <b>4c</b> (in DMSO- <i>d</i> <sub>6</sub> at 100 MHz)            | 8  |
| Figure S7. <sup>1</sup> H NMR spectrum of compound <b>4d</b> (in CDCl <sub>3</sub> at 400 MHz)                       | 9  |
| Figure S8. <sup>13</sup> C NMR spectrum of compound <b>4d</b> (in CDCl <sub>3</sub> at 100 MHz)                      | 10 |
| Figure S9. <sup>1</sup> H NMR spectrum of compound <b>4f</b> (in DMSO- <i>d</i> <sub>6</sub> at 400 MHz)             | 11 |
| Figure S10. <sup>13</sup> C NMR spectrum of compound <b>4f</b> (in DMSO- <i>d</i> <sub>6</sub> at 100 MHz)           | 12 |
| Figure S11. <sup>1</sup> H NMR spectrum of compound <b>4g</b> (in DMSO- <i>d</i> <sub>6</sub> at 400 MHz)            | 13 |
| Figure S12. <sup>13</sup> C NMR spectrum of compound <b>4g</b> (in DMSO- <i>d</i> <sub>6</sub> at 100 MHz)           | 14 |
| Figure S13. <sup>1</sup> H NMR spectrum of compound <b>5a</b> (in DMSO- <i>d</i> <sub>6</sub> at 400 MHz)            | 15 |
| Figure S14. <sup>13</sup> C NMR spectrum of compound <b>5a</b> (in DMSO- <i>d</i> <sub>6</sub> at 100 MHz)           | 16 |
| Figure S15. <sup>1</sup> H NMR spectrum of compound <b>5b</b> (in DMSO- <i>d</i> <sub>6</sub> at 400 MHz)            | 17 |
| Figure S16. <sup>13</sup> C NMR spectrum of compound <b>5b</b> (in DMSO- <i>d</i> <sub>6</sub> at 100 MHz)           | 18 |
| Figure S17. <sup>1</sup> H NMR spectrum of compound <b>5c</b> (in DMSO- <i>d</i> <sub>6</sub> at 400 MHz)            | 19 |
| Figure S18. <sup>13</sup> C NMR spectrum of compound <b>5c</b> (in DMSO- <i>d</i> <sub>6</sub> at 100 MHz)           | 20 |
| Figure S19. <sup>1</sup> H NMR spectrum of compound <b>5d</b> (in DMSO- <i>d</i> <sub>6</sub> at 400 MHz)            | 21 |
| Figure S20. <sup>13</sup> C NMR spectrum of compound <b>5d</b> (in DMSO- <i>d</i> <sub>6</sub> at 100 MHz)           | 22 |
| Figure S21. <sup>1</sup> H NMR spectrum of compound <b>5e</b> (in DMSO- <i>d</i> <sub>6</sub> at 400 MHz)            | 23 |
| Figure S22. <sup>13</sup> C NMR spectrum of compound <b>5e</b> (in DMSO- <i>d</i> <sub>6</sub> at 100 MHz)           | 24 |
| Figure S23. <sup>1</sup> H NMR spectrum of compound <b>5f</b> (in DMSO- <i>d</i> <sub>6</sub> at 400 MHz)            | 25 |
| Figure S24. <sup>13</sup> C NMR spectrum of compound <b>5f</b> (in DMSO- <i>d</i> <sub>6</sub> at 100 MHz)           | 26 |
| Figure S25. <sup>1</sup> H NMR spectrum of compound <b>5g</b> (in DMSO- <i>d</i> <sub>6</sub> at 400 MHz)            | 27 |
| Figure S26. <sup>13</sup> C NMR spectrum of compound <b>5g</b> (in DMSO- <i>d</i> <sub>6</sub> at 100 MHz)           | 28 |
| Figure S27. <sup>1</sup> H NMR spectrum of compound <b>2a</b> (in CD <sub>3</sub> OD at 400 MHz)                     | 29 |
| Figure S28. <sup>13</sup> C NMR spectrum of compound <b>2a</b> (in DMSO- <i>d</i> <sub>6</sub> at 100 MHz)           | 30 |
| Figure S29. <sup>1</sup> H NMR spectrum of compound <b>2b</b> (in CD <sub>3</sub> OD at 400 MHz)                     | 31 |
| Figure S30. <sup>13</sup> C NMR spectrum of compound <b>2b</b> (in DMSO- <i>d</i> <sub>6</sub> at 100 MHz)           | 32 |
| Figure S31. <sup>1</sup> H NMR spectrum of compound <b>2c</b> (in CD <sub>3</sub> OD at 400 MHz)                     | 33 |
| Figure S32. <sup>13</sup> C NMR spectrum of compound <b>2c</b> (in CD <sub>3</sub> OD at 100 MHz)                    | 34 |
| Figure S33. <sup>1</sup> H NMR spectrum of compound <b>2d</b> (in DMSO- <i>d</i> <sub>6</sub> at 400 MHz)            | 35 |
| Figure S34. <sup>13</sup> C NMR spectrum of compound <b>2d</b> (in DMSO- <i>d</i> <sub>6</sub> at 100 MHz)           | 36 |
| Figure S35. <sup>1</sup> H NMR spectrum of compound <b>2e</b> (in DMSO- <i>d</i> <sub>6</sub> at 400 MHz)            | 37 |
| Figure S36. <sup>13</sup> C NMR spectrum of compound <b>2e</b> (in DMSO- <i>d</i> <sub>6</sub> at 100 MHz)           | 38 |
| Figure S37. <sup>1</sup> H NMR spectrum of compound <b>2f</b> (in CD <sub>3</sub> OD at 400 MHz)                     | 39 |
| Figure S38. <sup>13</sup> C NMR spectrum of compound <b>2f</b> (in DMSO- <i>d</i> <sub>6</sub> at 100 MHz)           | 40 |
| Figure S39. <sup>1</sup> H NMR spectrum of compound <b>2g</b> (in CD <sub>3</sub> OD at 400 MHz)                     | 41 |
| Figure S40. <sup>13</sup> C NMR spectrum of compound <b>2g</b> (in DMSO- <i>d</i> <sub>6</sub> at 100 MHz)           | 42 |
| Figure S41. <sup>1</sup> H NMR spectrum of compound <b>6a</b> (in CDCl <sub>3</sub> at 400 MHz)                      | 43 |
| Figure S42. <sup>13</sup> C NMR spectrum of compound <b>6a</b> (in CDCl <sub>3</sub> at 100 MHz)                     | 44 |
| Figure S43. <sup>1</sup> H NMR spectrum of compound <b>6b</b> (in CDCl <sub>3</sub> at 400 MHz)                      | 45 |
| Figure S44. <sup>13</sup> C NMR spectrum of compound <b>6b</b> (in CDCl <sub>3</sub> at 100 MHz)                     | 46 |
| Figure S45. <sup>1</sup> H NMR spectrum of compound <b>6c</b> (in CDCl <sub>3</sub> at 400 MHz)                      | 47 |
| Figure S46. <sup>13</sup> C NMR spectrum of compound <b>6c</b> (in CDCl <sub>3</sub> at 100 MHz)                     | 48 |
| Figure S47. <sup>1</sup> H NMR spectrum of compound <b>6d</b> (in CDCl <sub>3</sub> at 400 MHz)                      | 49 |
| Figure S48. <sup>13</sup> C NMR spectrum of compound <b>6d</b> (in CDCl <sub>3</sub> at 100 MHz)                     | 50 |
| Figure S49. <sup>1</sup> H NMR spectrum of compound <b>3a</b> (in CDCl <sub>3</sub> :CD <sub>3</sub> OD at 400 MHz)  | 51 |
| Figure S50. <sup>13</sup> C NMR spectrum of compound <b>3a</b> (in CDCl <sub>3</sub> :CD <sub>3</sub> OD at 100 MHz) | 52 |
| Figure S51. <sup>1</sup> H NMR spectrum of compound <b>3b</b> (in CDCl <sub>3</sub> :CD <sub>3</sub> OD at 400 MHz)  | 53 |
| Figure S52. <sup>13</sup> C NMR spectrum of compound <b>3b</b> (in DMSO- <i>d</i> <sub>6</sub> at 100 MHz)           | 54 |
| Figure S53. <sup>1</sup> H NMR spectrum of compound <b>3c</b> (in DMSO- <i>d</i> <sub>6</sub> at 400 MHz)            | 55 |
| Figure S54. <sup>13</sup> C NMR spectrum of compound <b>3c</b> (in DMSO- <i>d</i> <sub>6</sub> at 100 MHz)           | 56 |
| Figure S55. <sup>1</sup> H NMR spectrum of compound <b>3d</b> (in DMSO- <i>d</i> <sub>6</sub> at 400 MHz)            | 57 |
| Figure S56. <sup>13</sup> C NMR spectrum of compound <b>3d</b> (in DMSO- <i>d</i> <sub>6</sub> at 100 MHz)           | 58 |

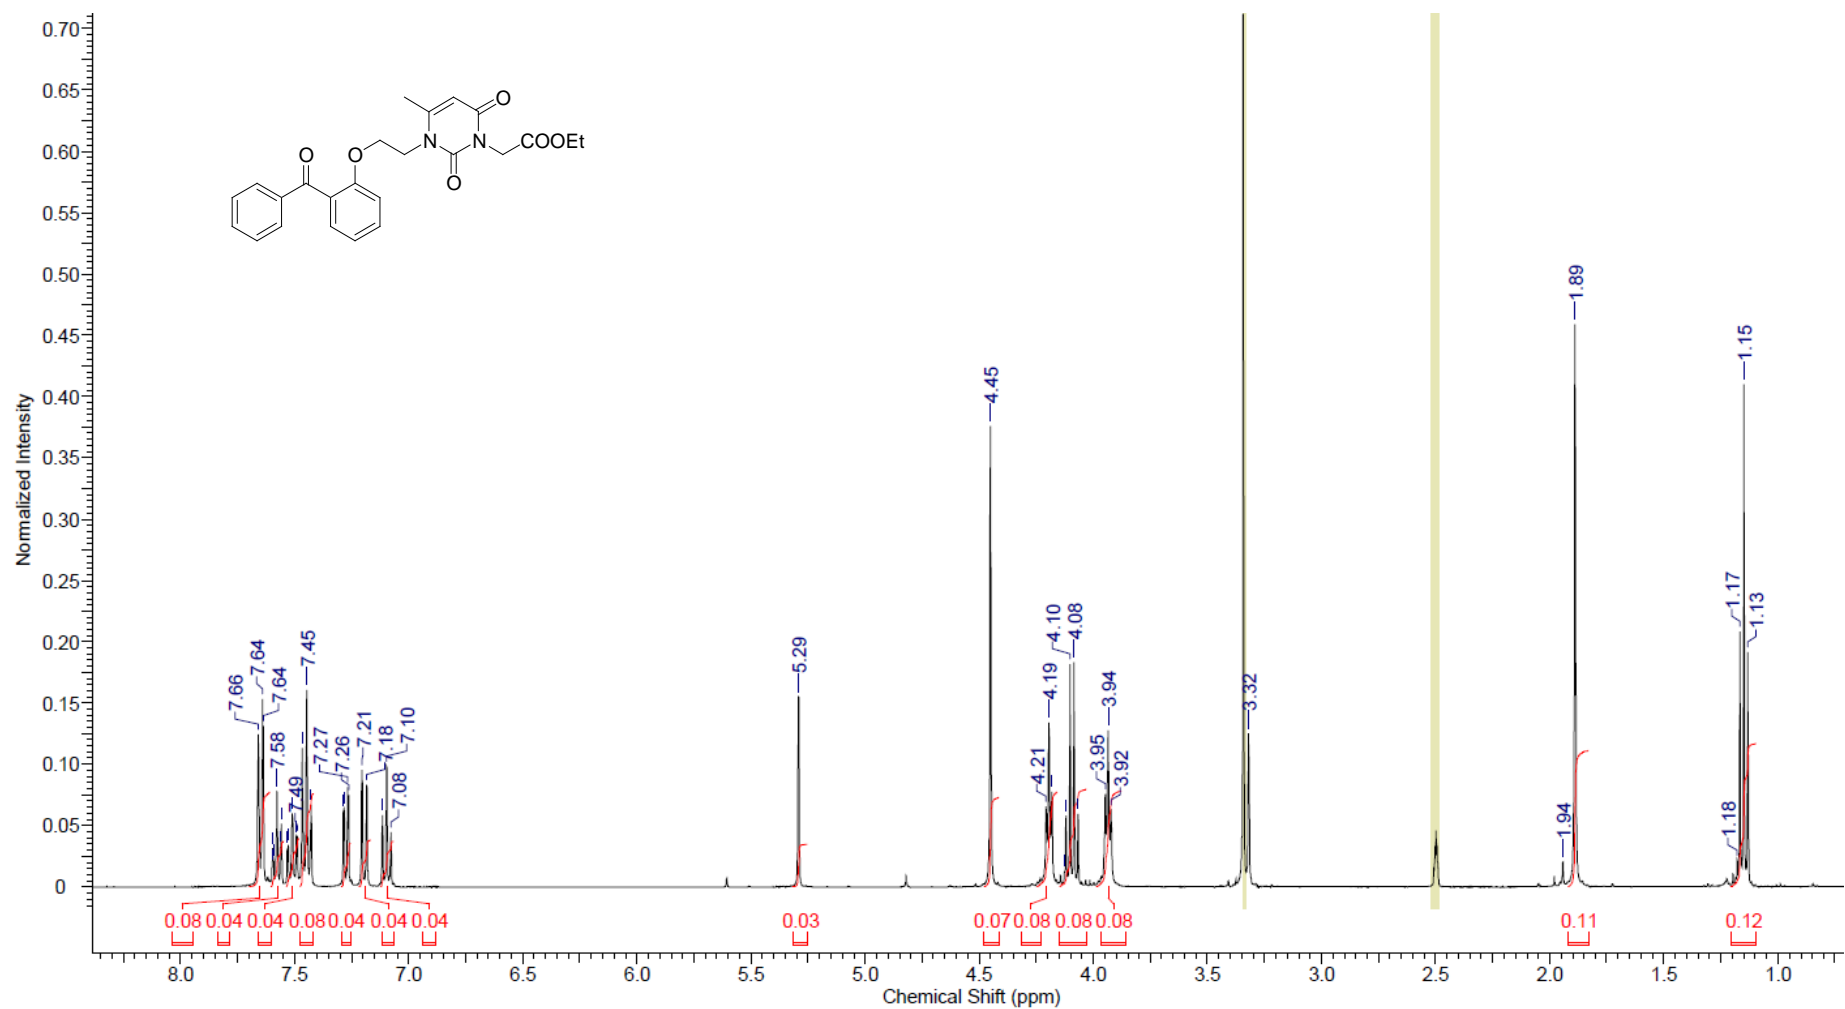

**Figure S1** <sup>1</sup>H NMR spectrum of compound **4a** in DMSO-*d*<sub>6</sub> at 400 MHz.

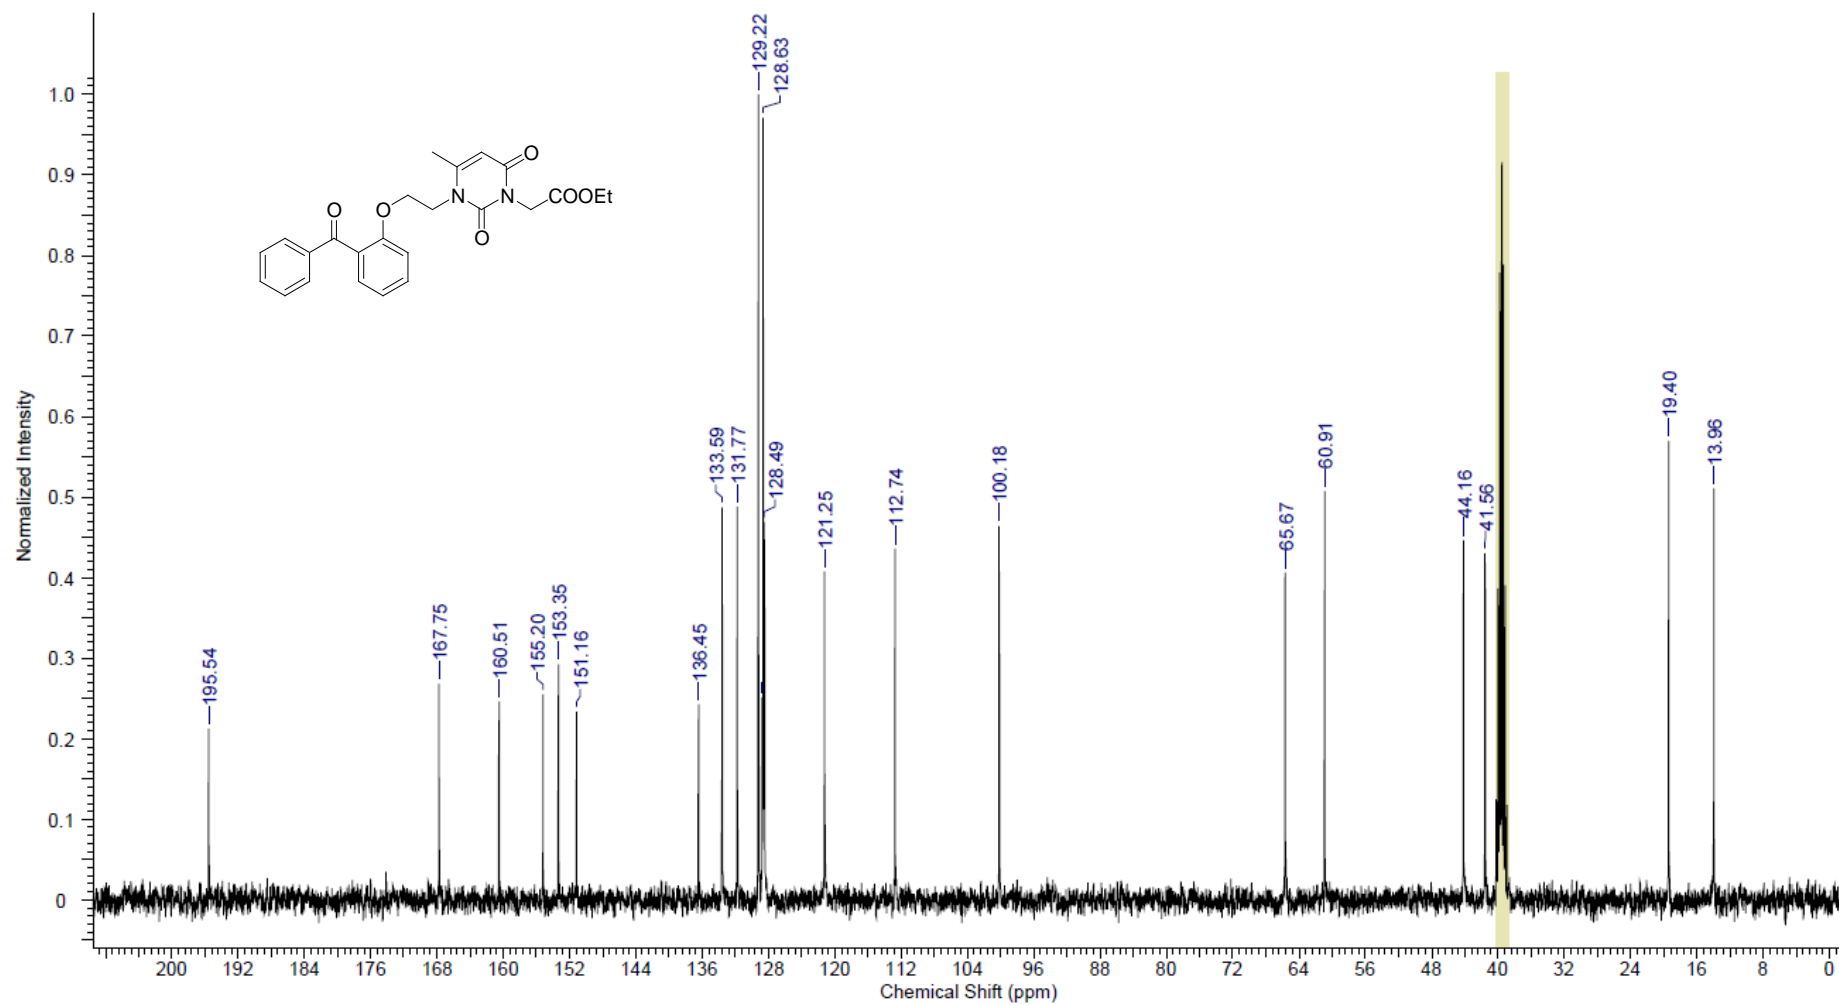

**Figure S2**  $^{13}\text{C}$  NMR spectrum of compound **4a** in  $\text{DMSO-}d_6$  at 100 MHz.

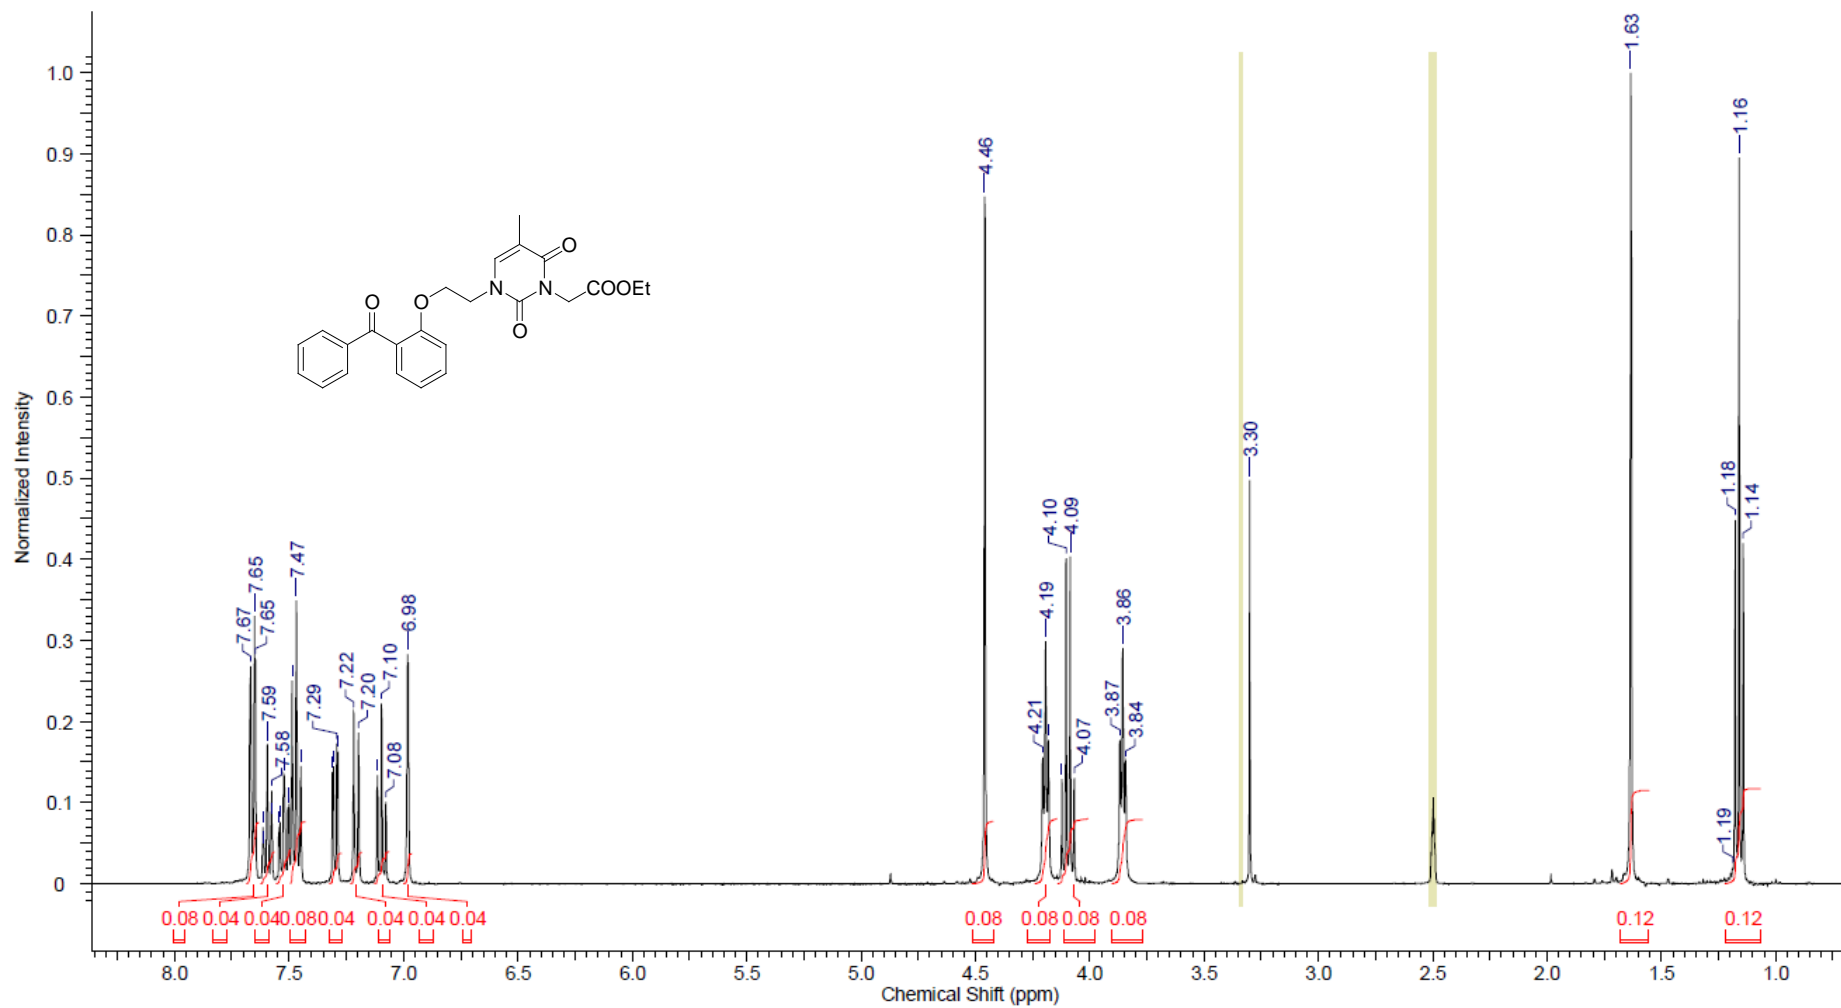

**Figure S3.**  $^1\text{H}$  NMR spectrum of compound **4b** in  $\text{DMSO-}d_6$  at 400 MHz.

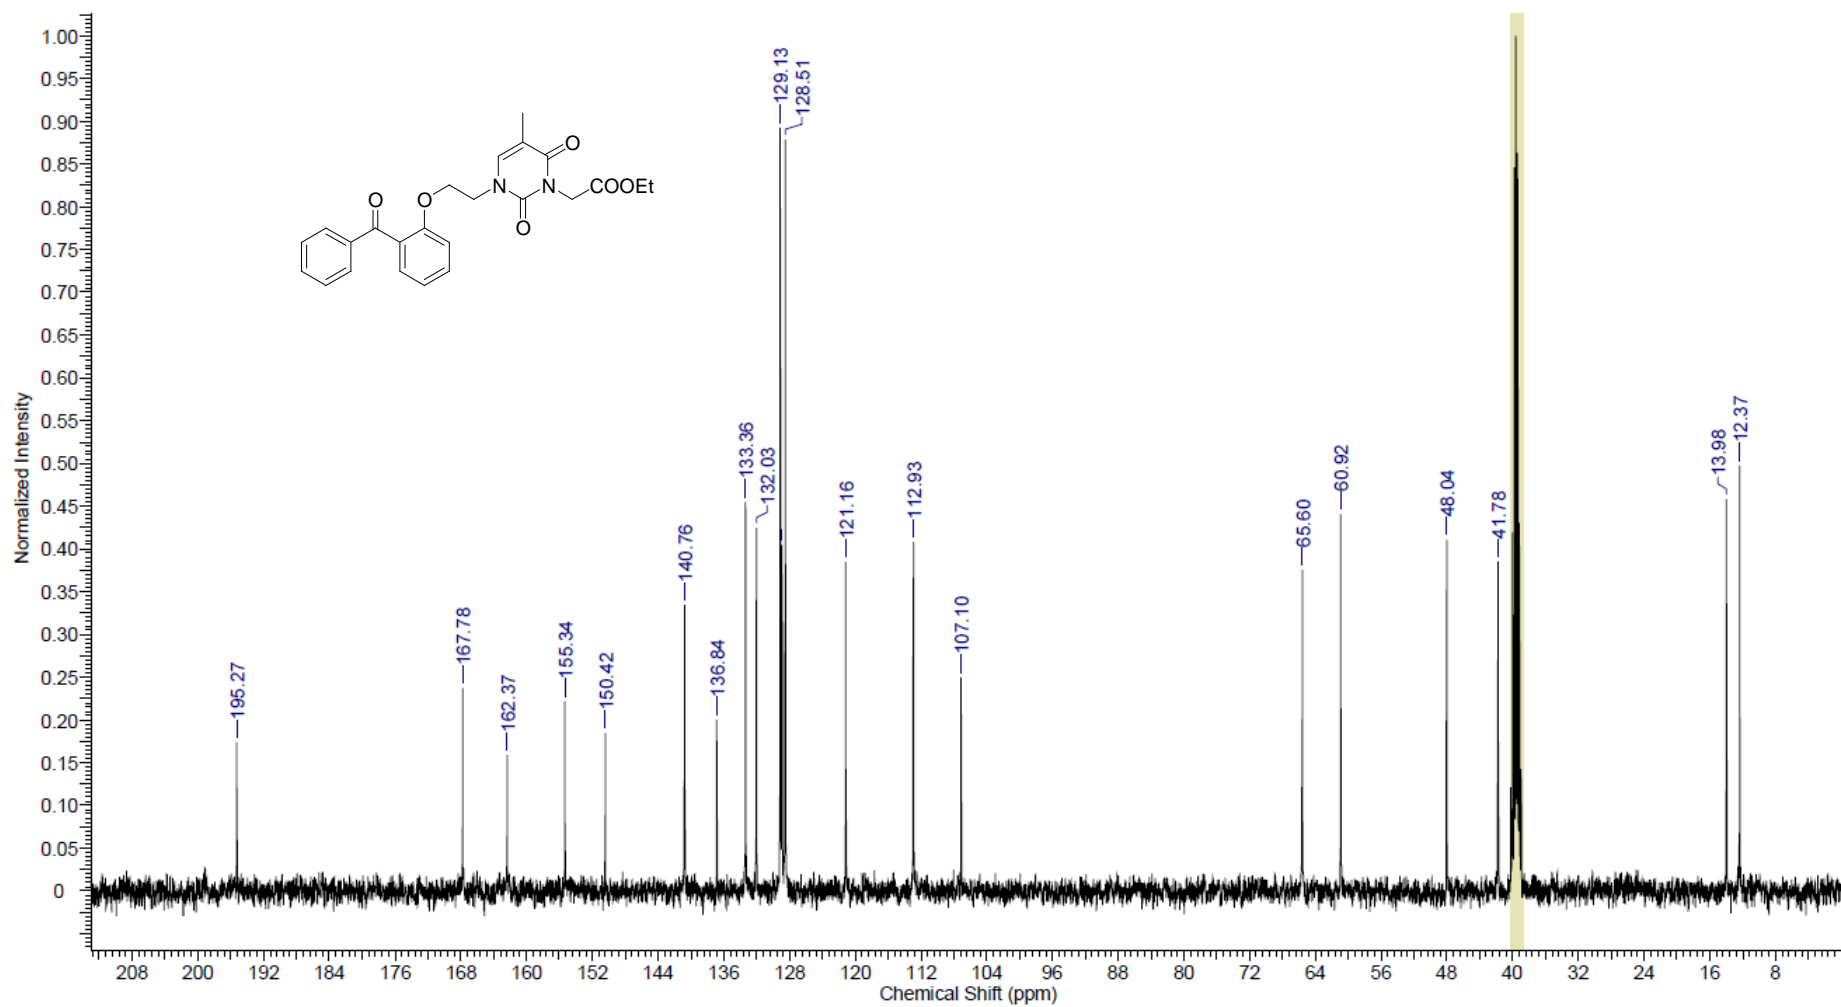

**Figure S4.**  $^{13}\text{C}$  NMR spectrum of compound **4b** in  $\text{DMSO-}d_6$  at 100 MHz.

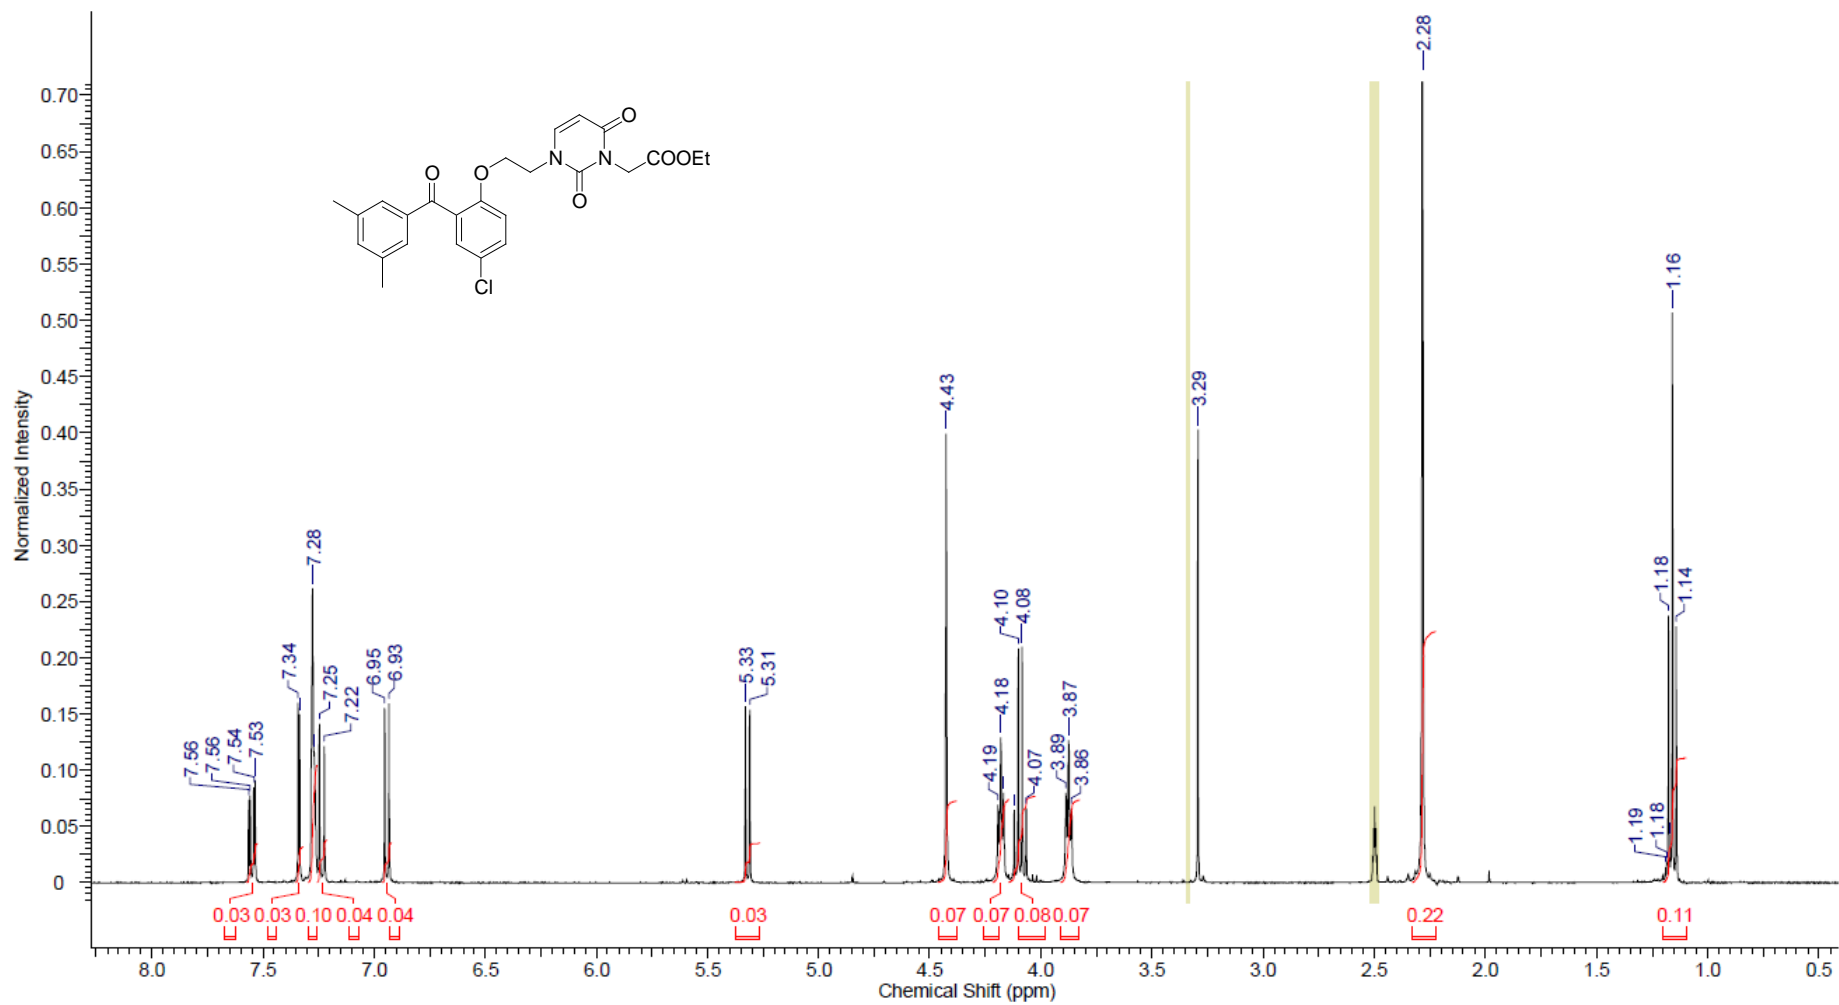

Figure S5. <sup>1</sup>H NMR spectrum of compound 4c in DMSO-*d*<sub>6</sub> at 400 MHz.

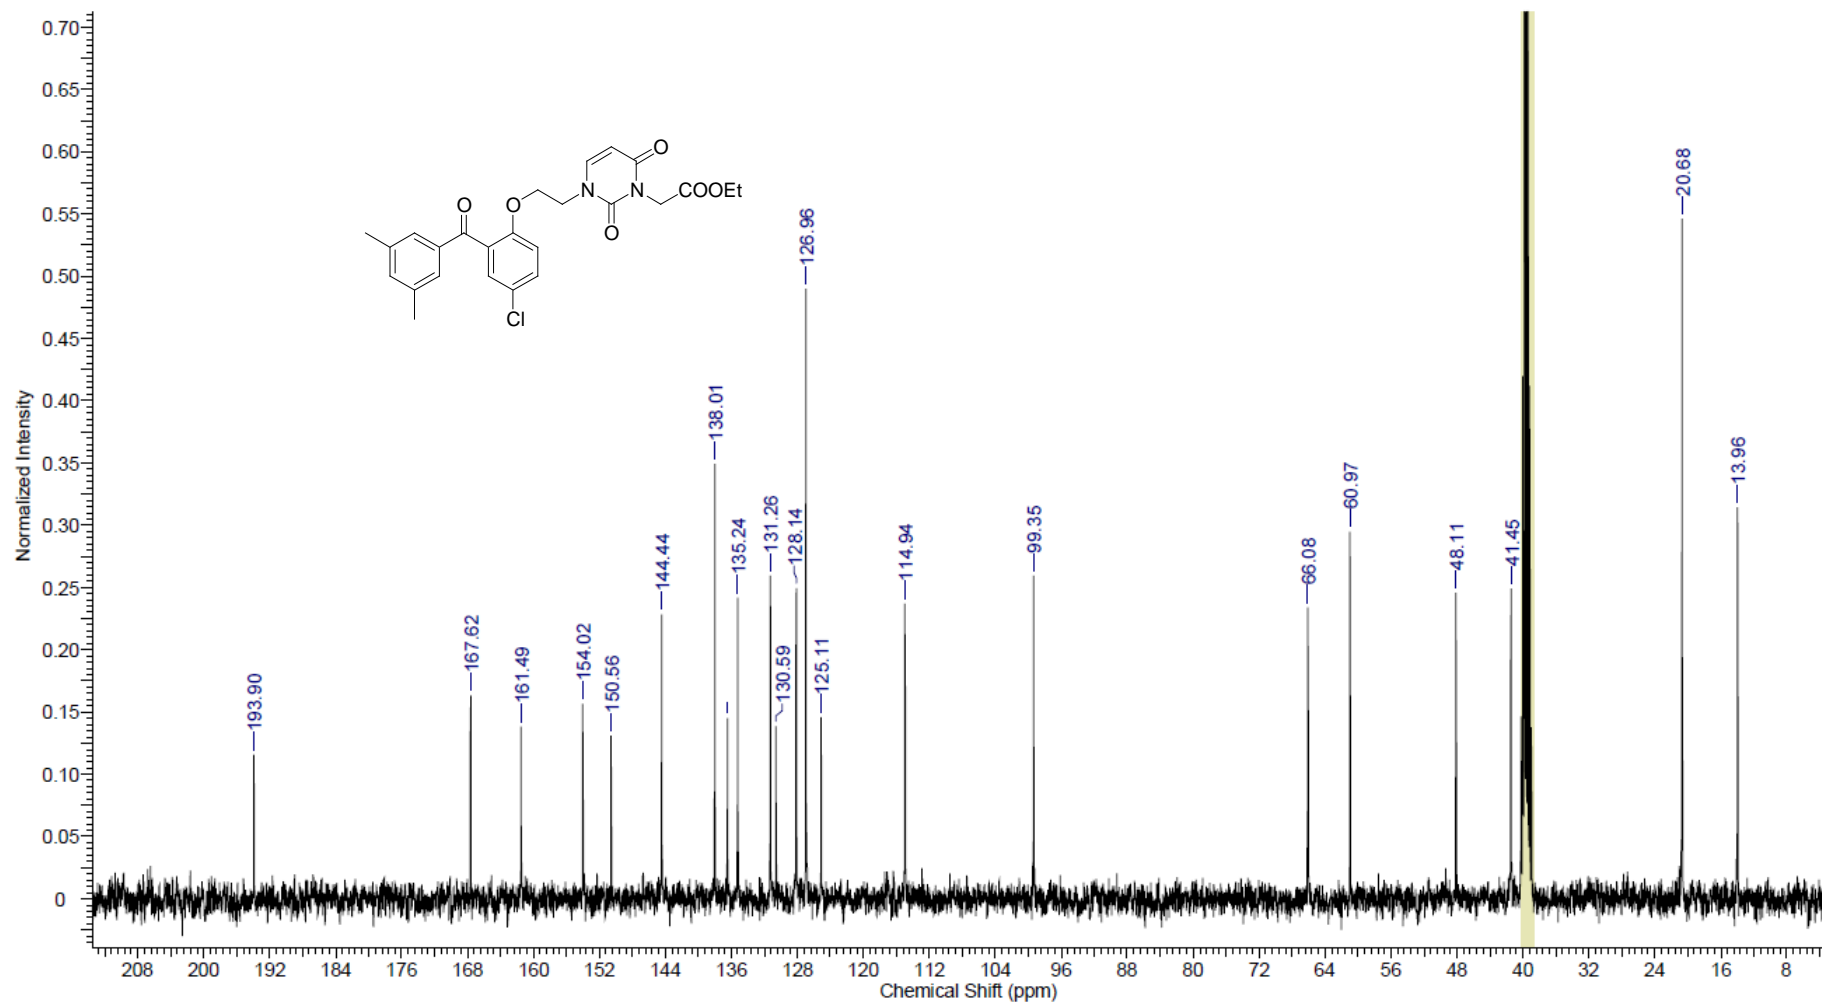

**Figure S6.** <sup>13</sup>C NMR spectrum of compound 4c in DMSO-*d*<sub>6</sub> at 100 MHz.



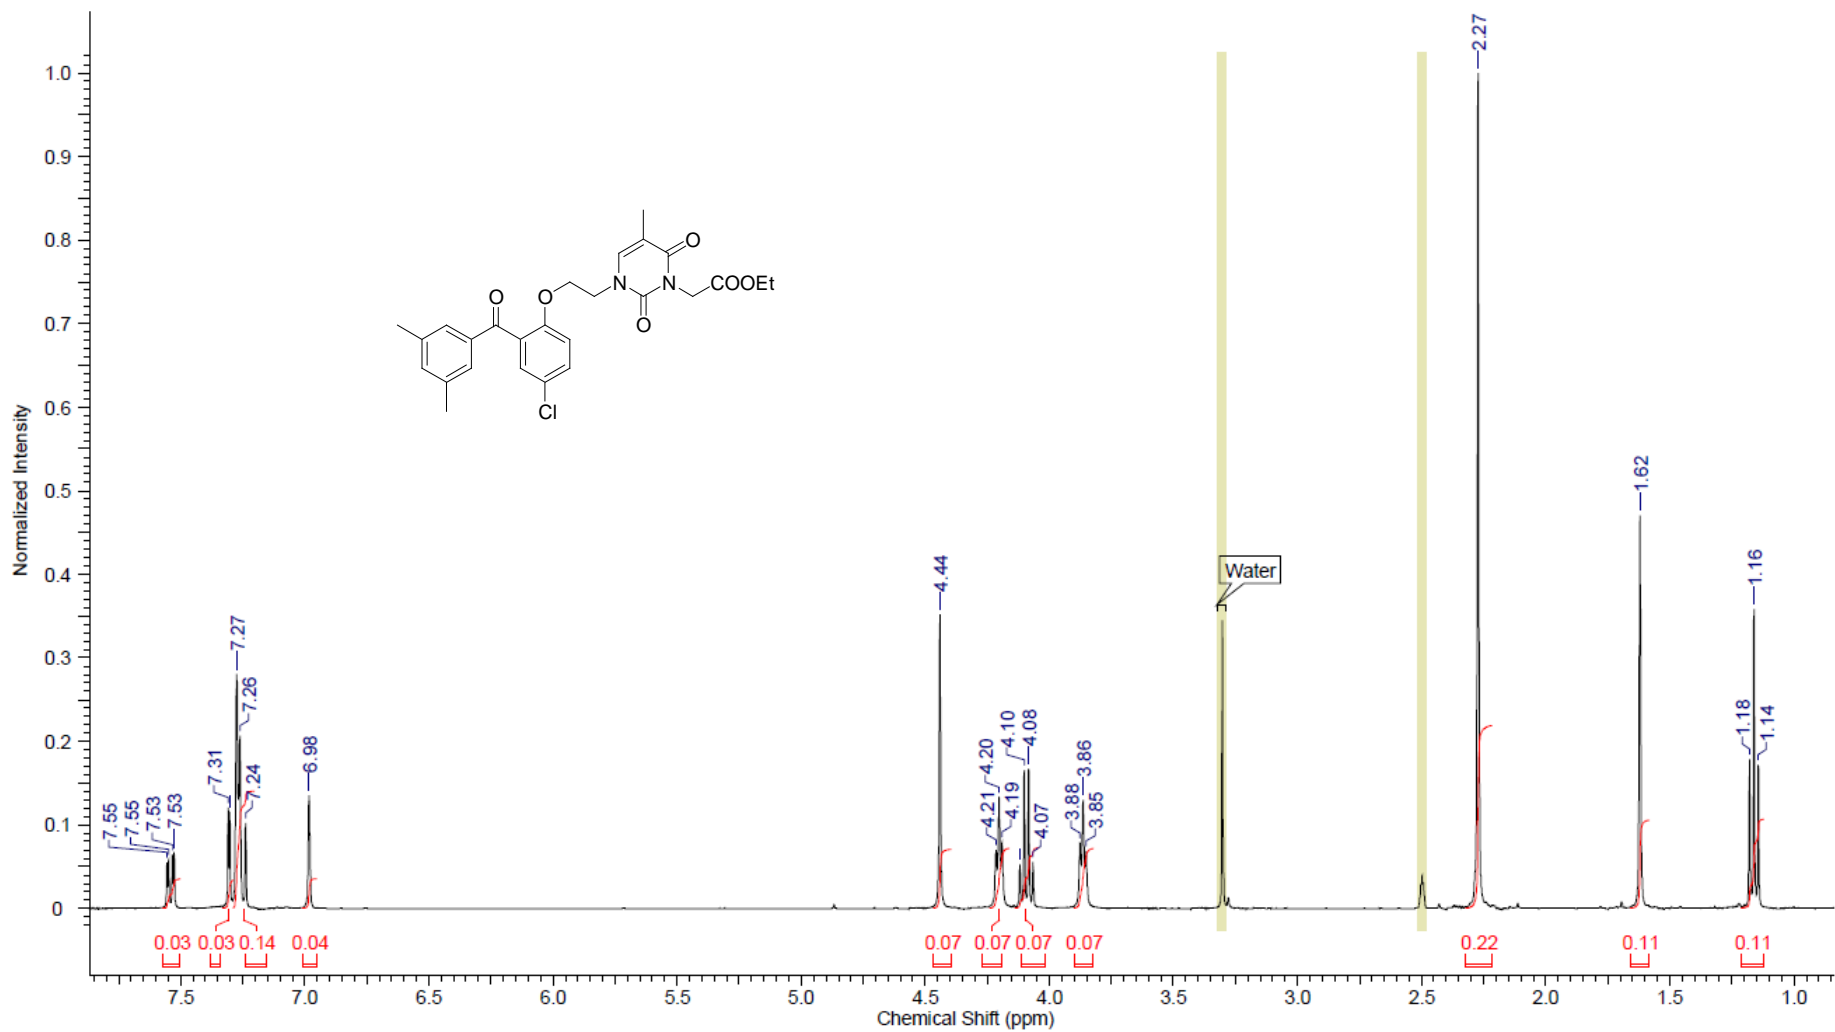

**Figure S7.**  $^1\text{H}$  NMR spectrum of compound **4d** in  $\text{CDCl}_3$  at 400 MHz.

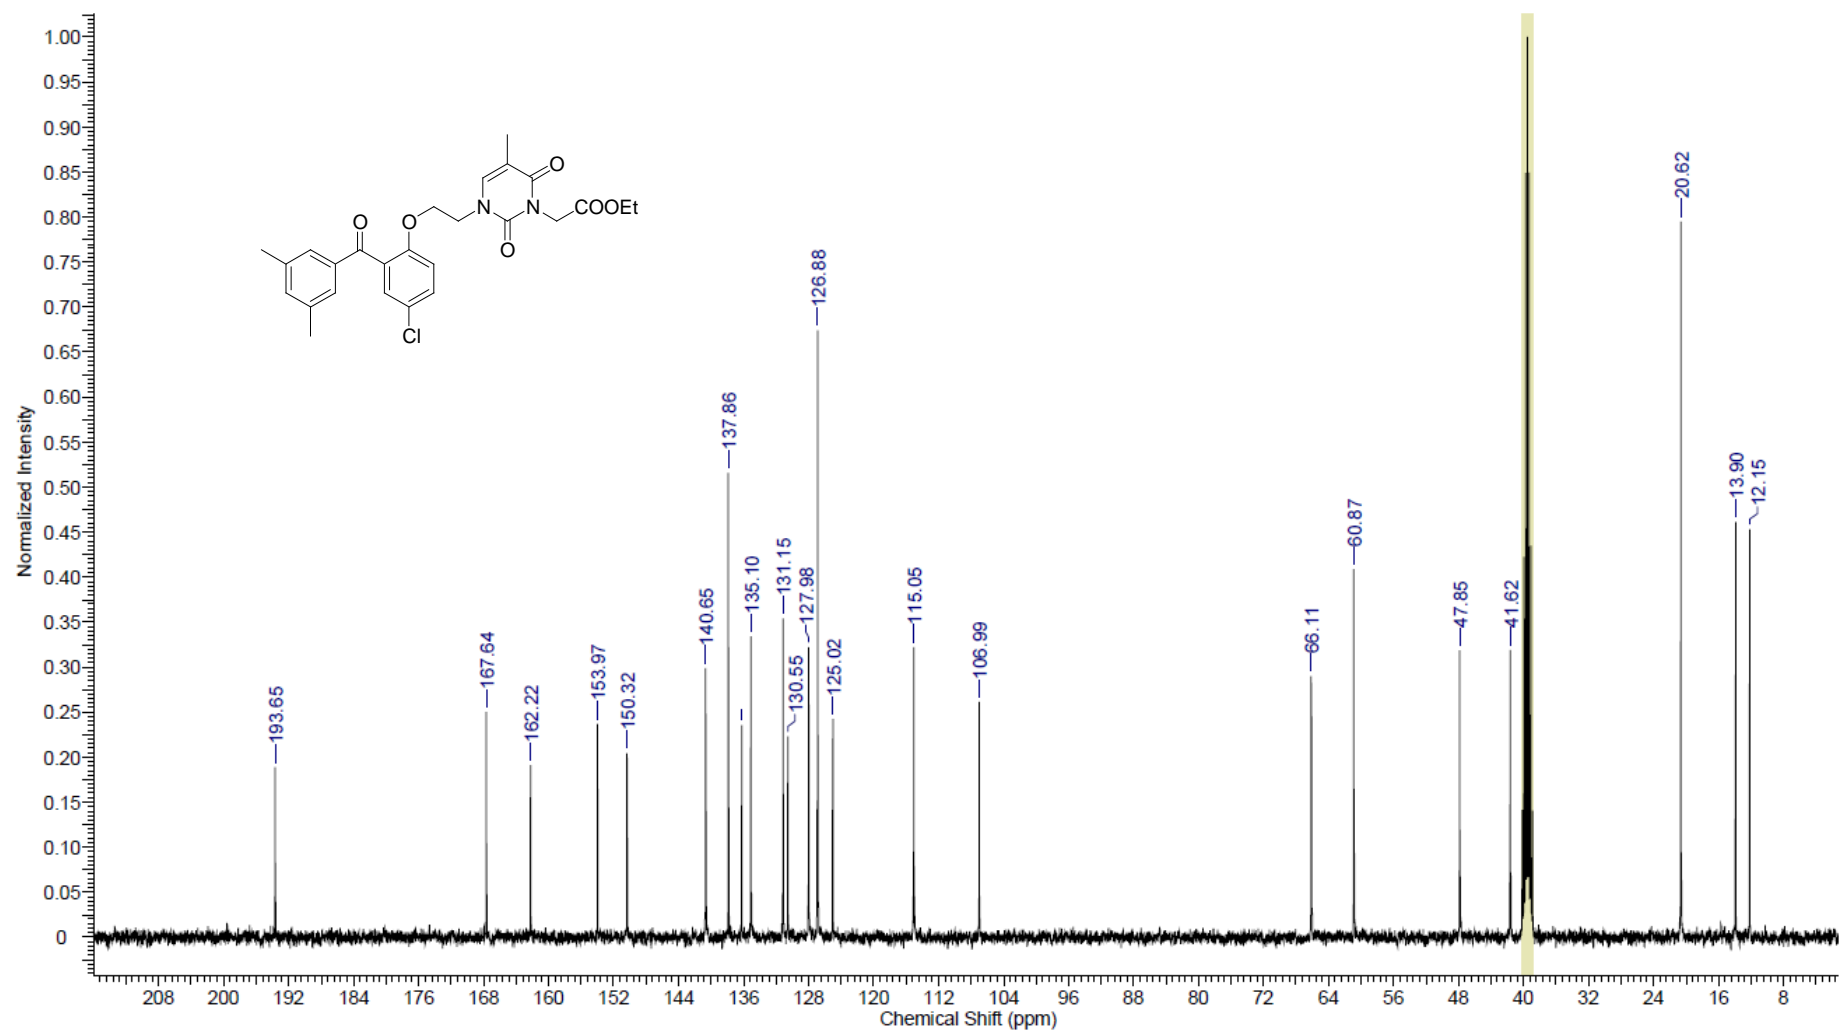

**Figure S8.**  $^{13}\text{C}$  NMR spectrum of compound **4d** in  $\text{CDCl}_3$  at 100 MHz.

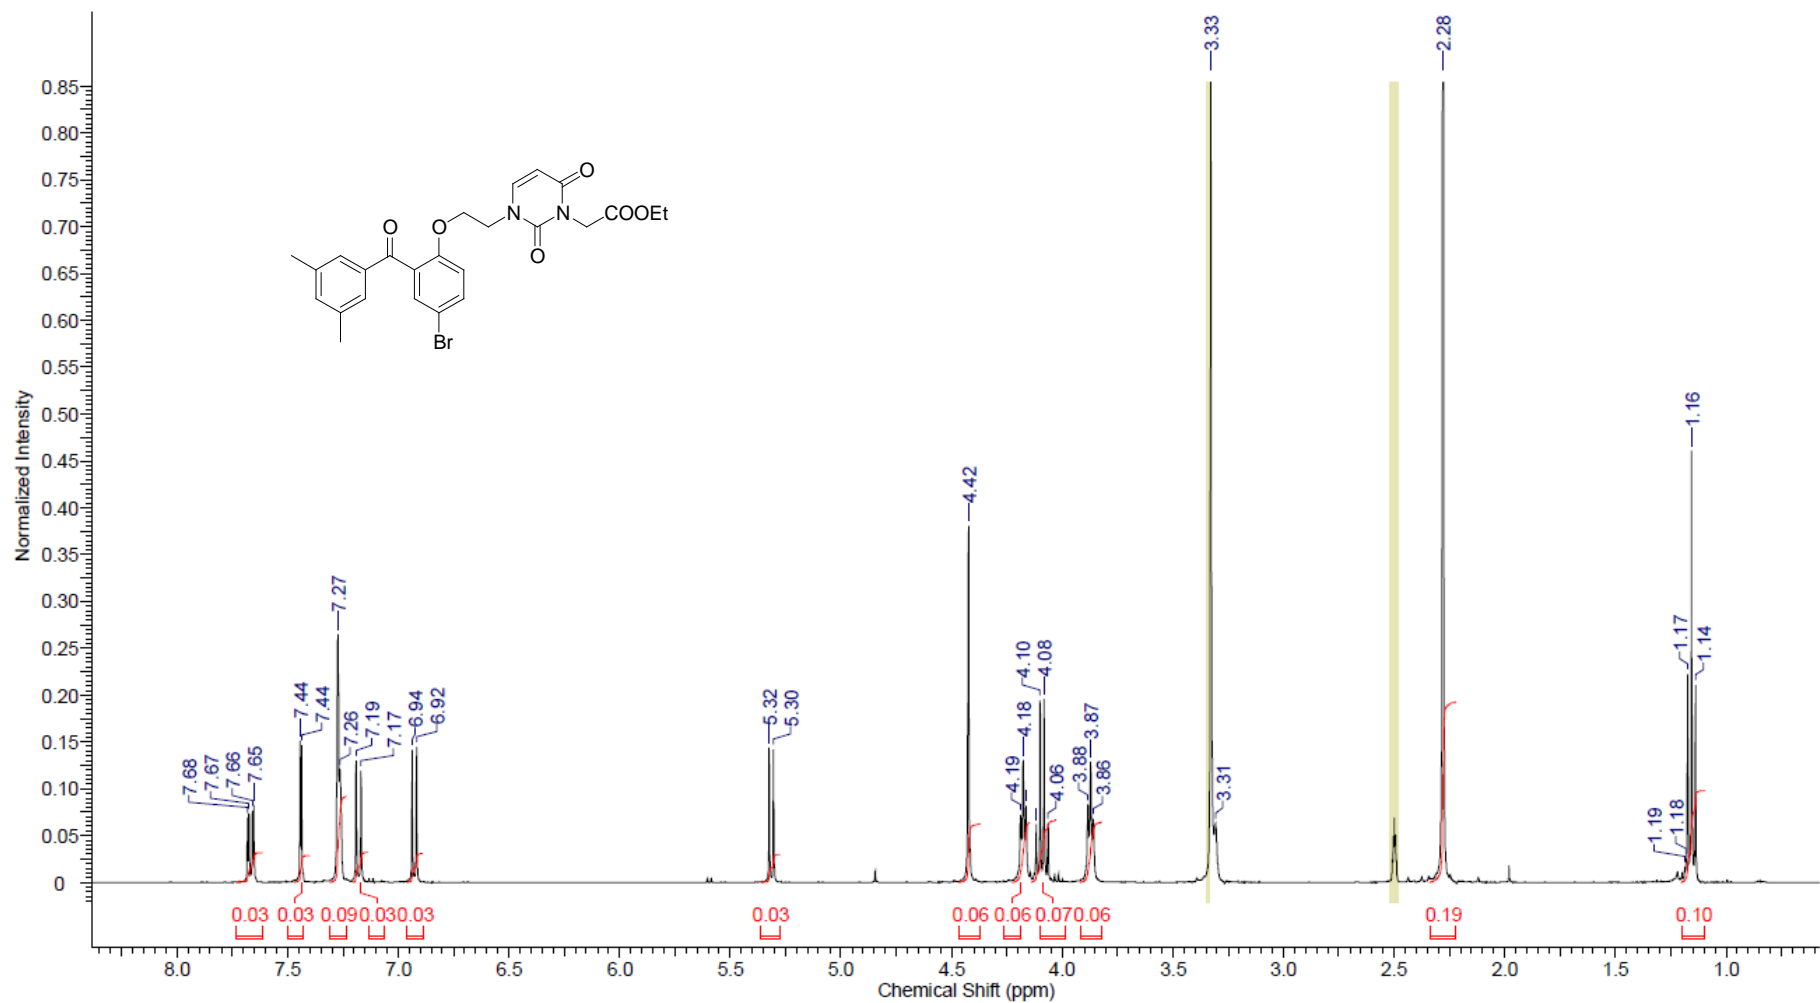

**Figure S9.** <sup>1</sup>H NMR spectrum of compound **4f** in DMSO-*d*<sub>6</sub> at 400 MHz.

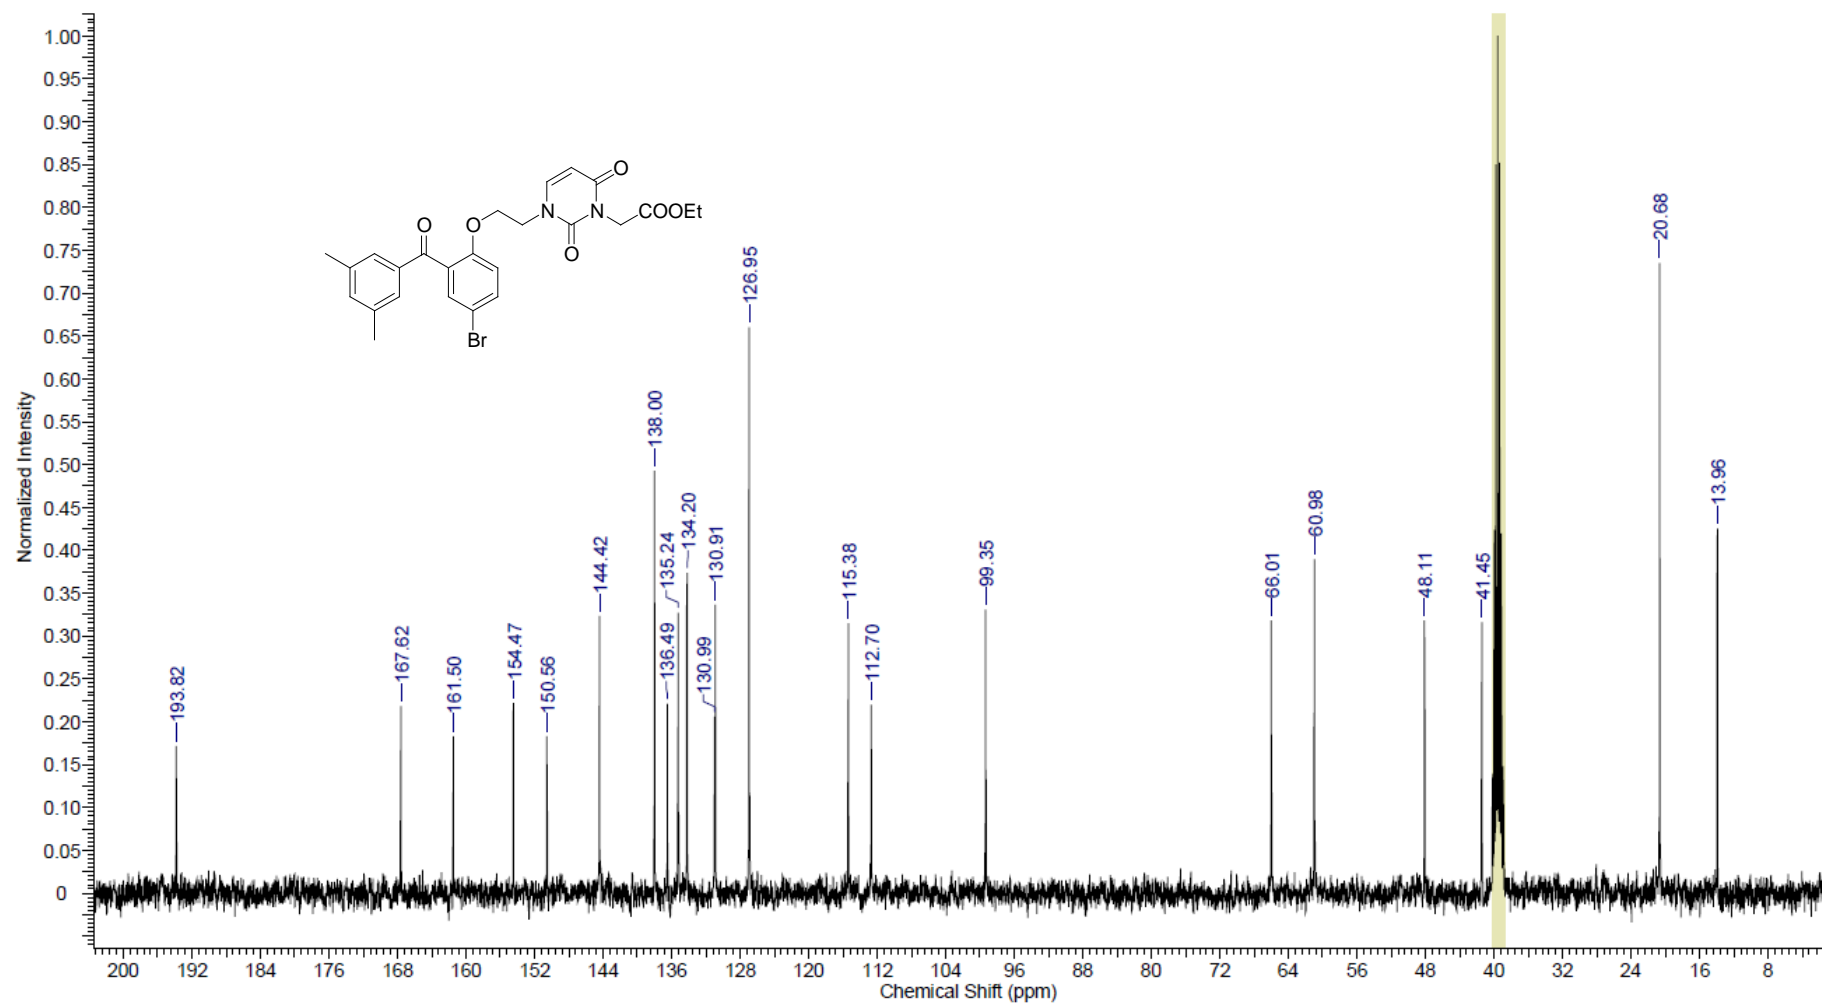

**Figure S10.**  $^{13}\text{C}$  NMR spectrum of compound **4f** in  $\text{DMSO-}d_6$  at 100 MHz.

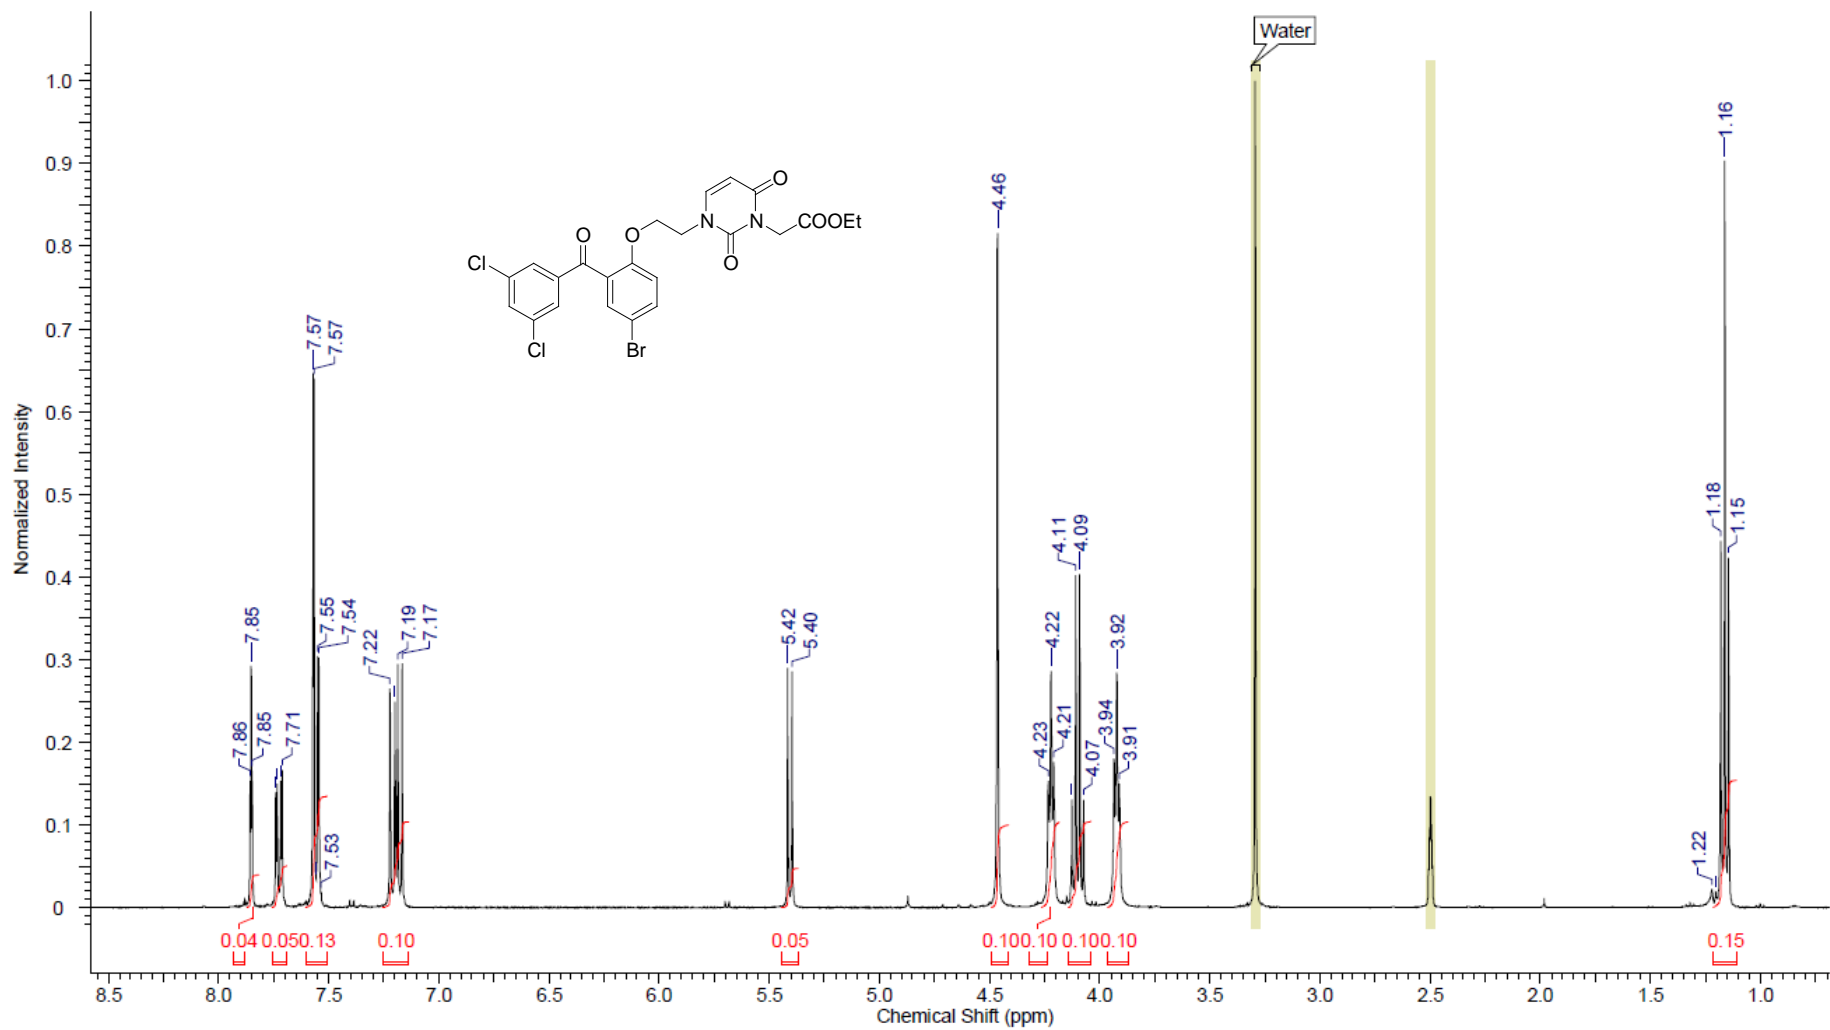

**Figure S11.**  $^1\text{H}$  NMR spectrum of compound **4g** in  $\text{DMSO-}d_6$  at 400 MHz.

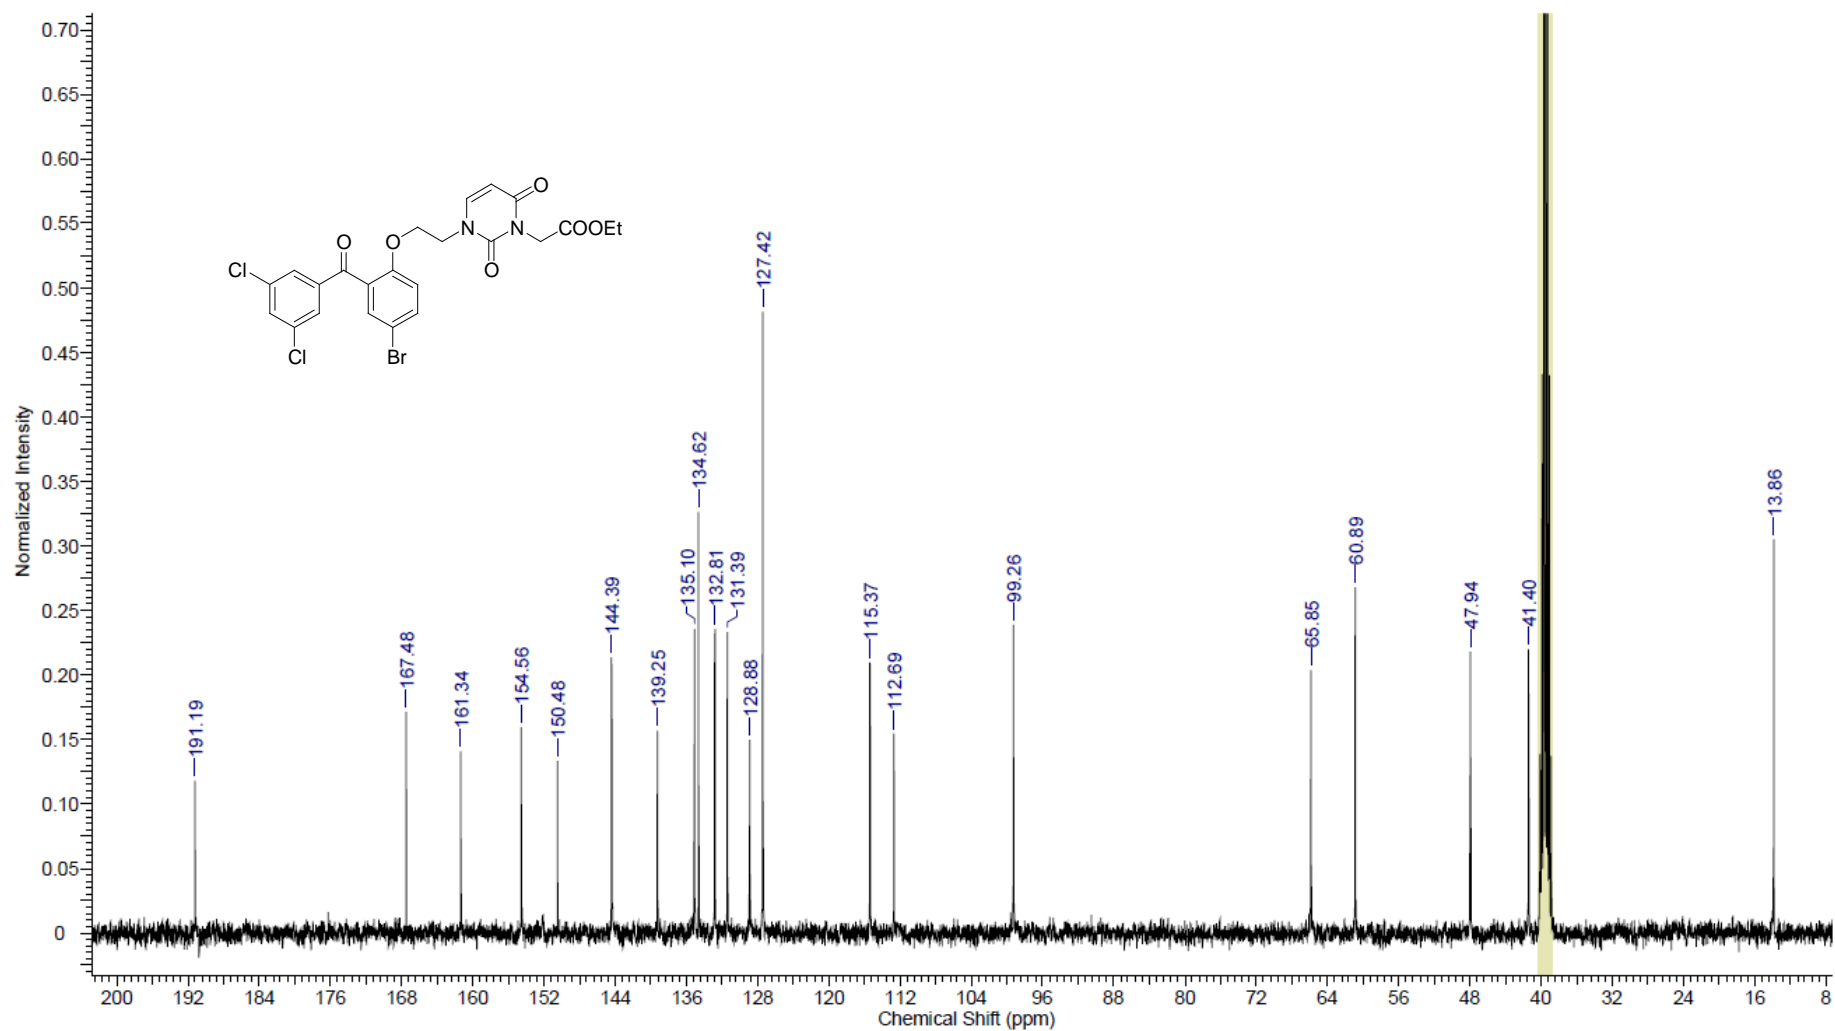

**Figure S12.** <sup>13</sup>C NMR spectrum of compound **4g** in DMSO-*d*<sub>6</sub> at 100 MHz.

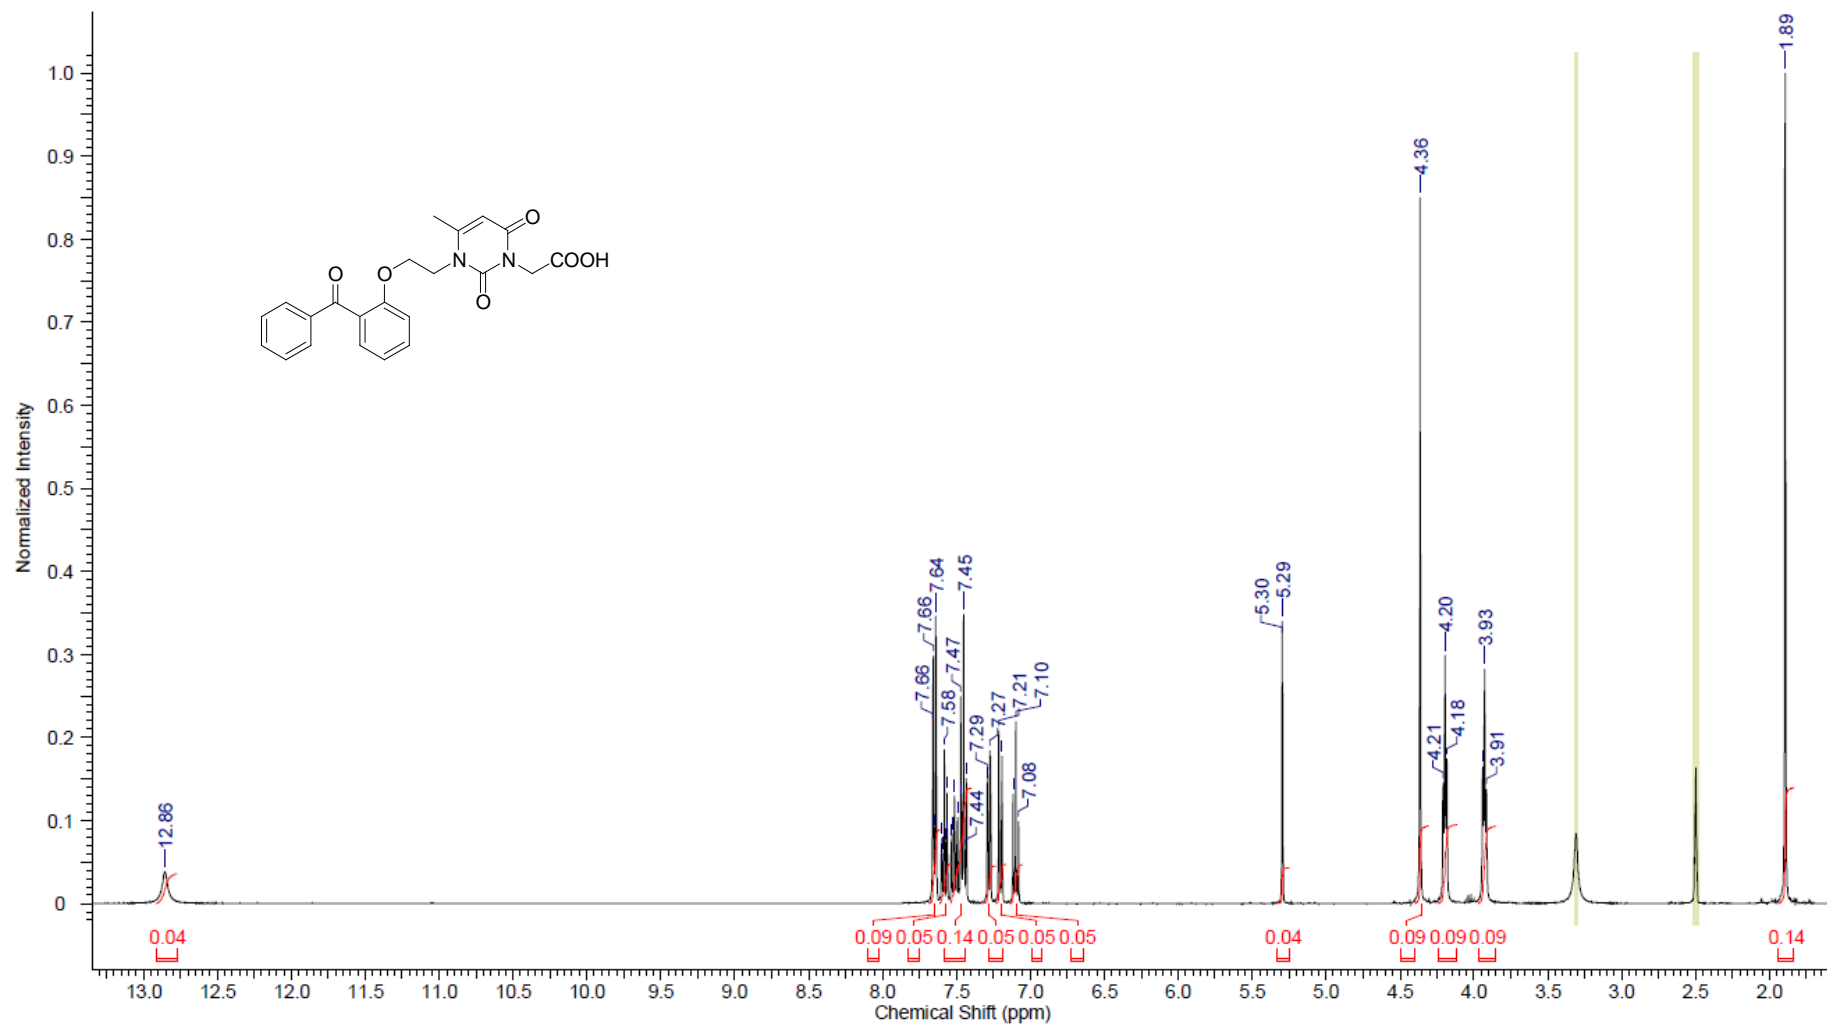

**Figure S13.** <sup>1</sup>H NMR spectrum of compound **5a** in DMSO-*d*<sub>6</sub> at 400 MHz.

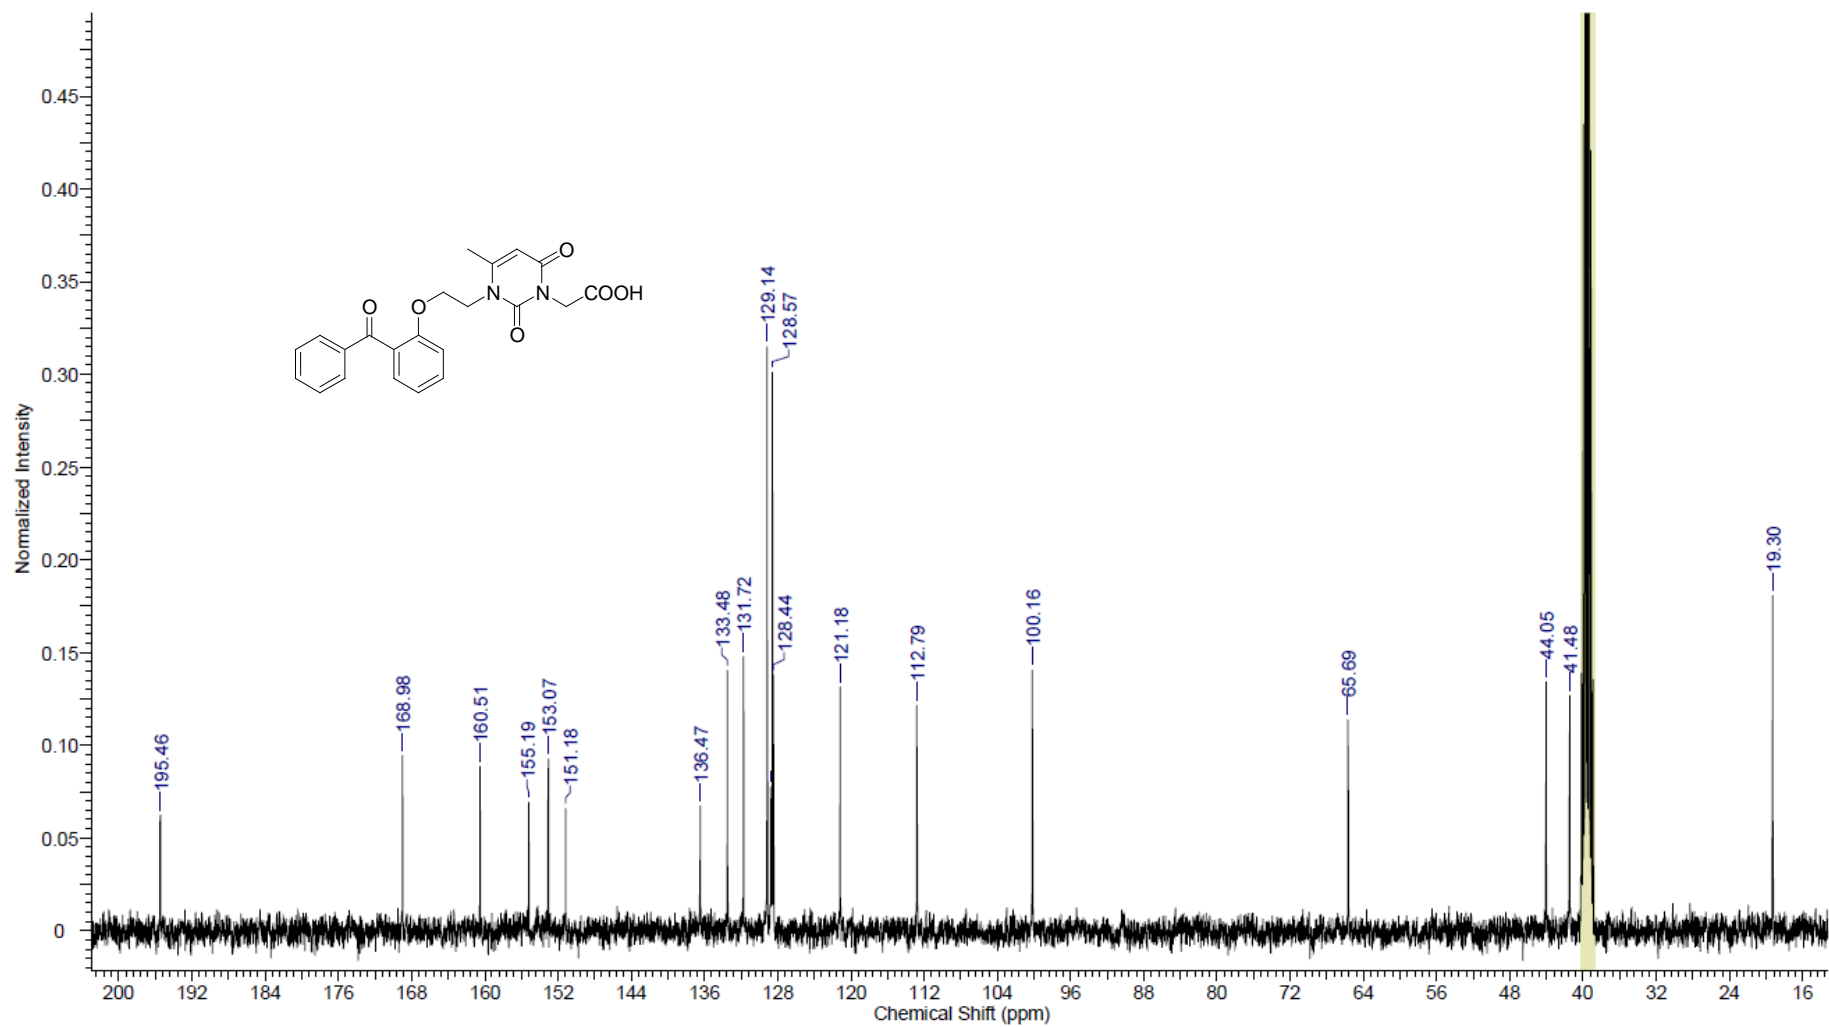

**Figure S14.**  $^{13}\text{C}$  NMR spectrum of compound **5a** in  $\text{DMSO-}d_6$  at 100 MHz.



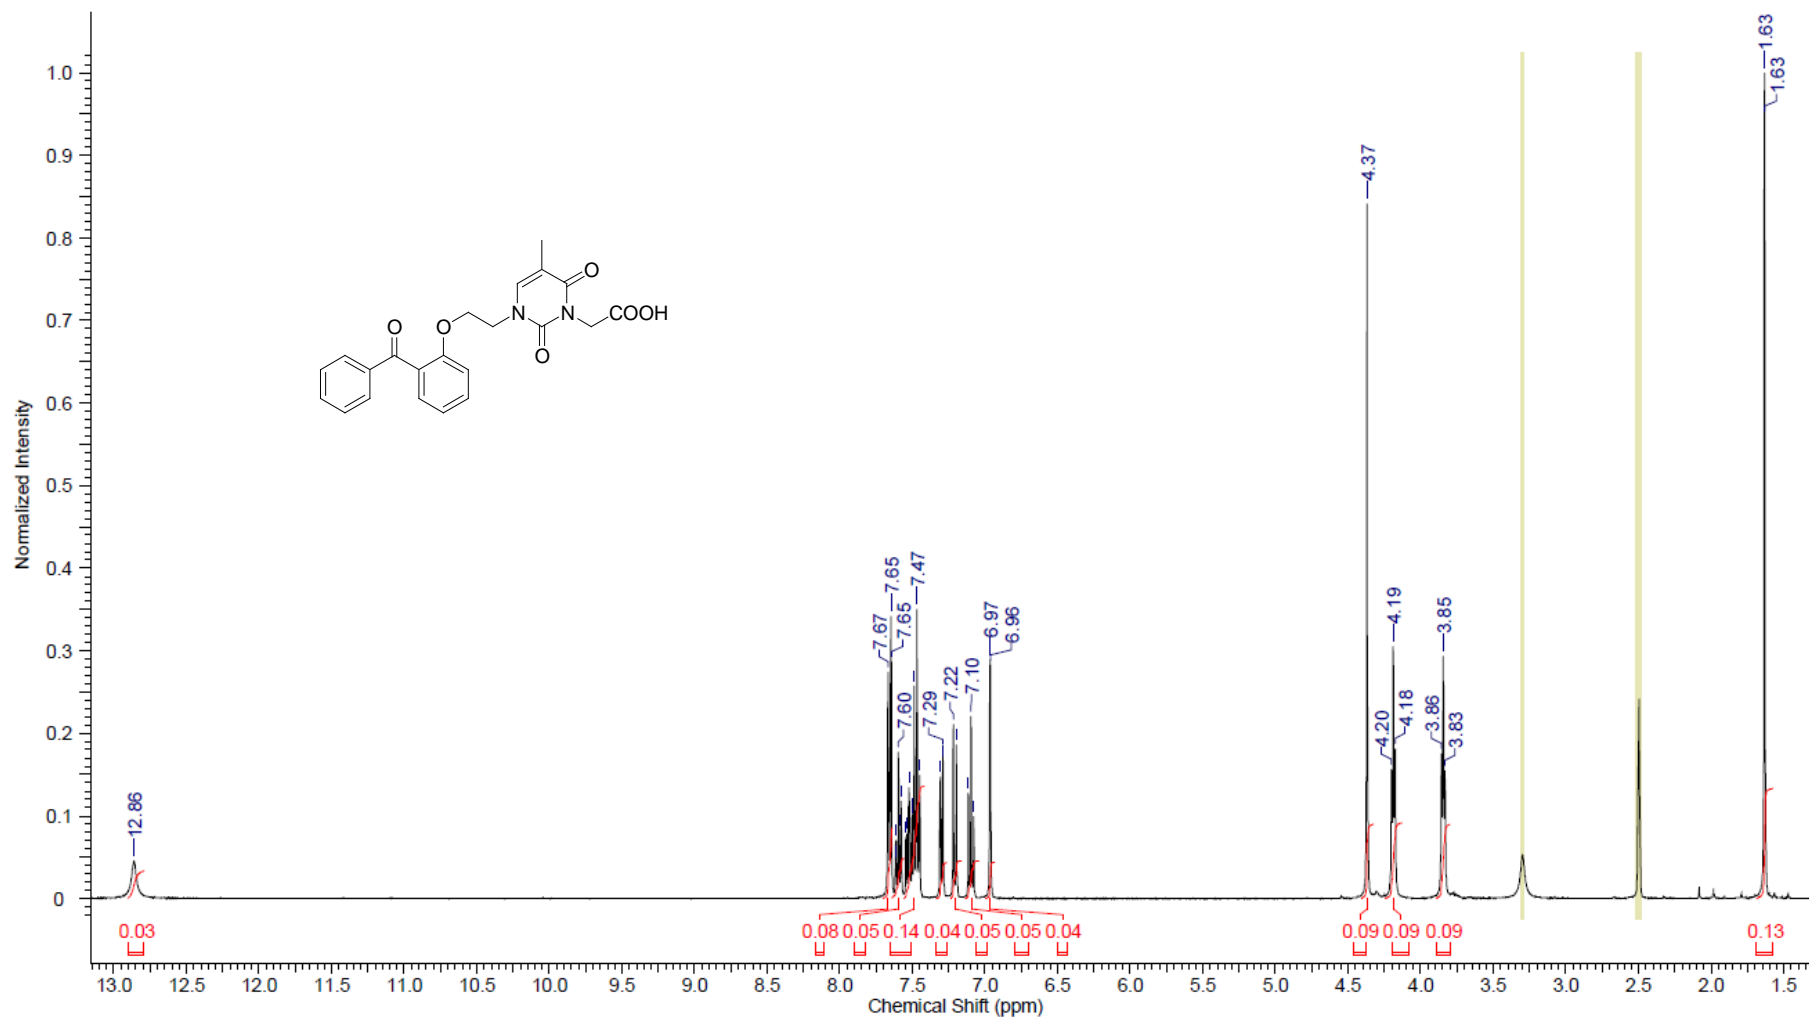

**Figure S15.**  $^1\text{H}$  NMR spectrum of compound **5b** in  $\text{DMSO-}d_6$  at 400 MHz.

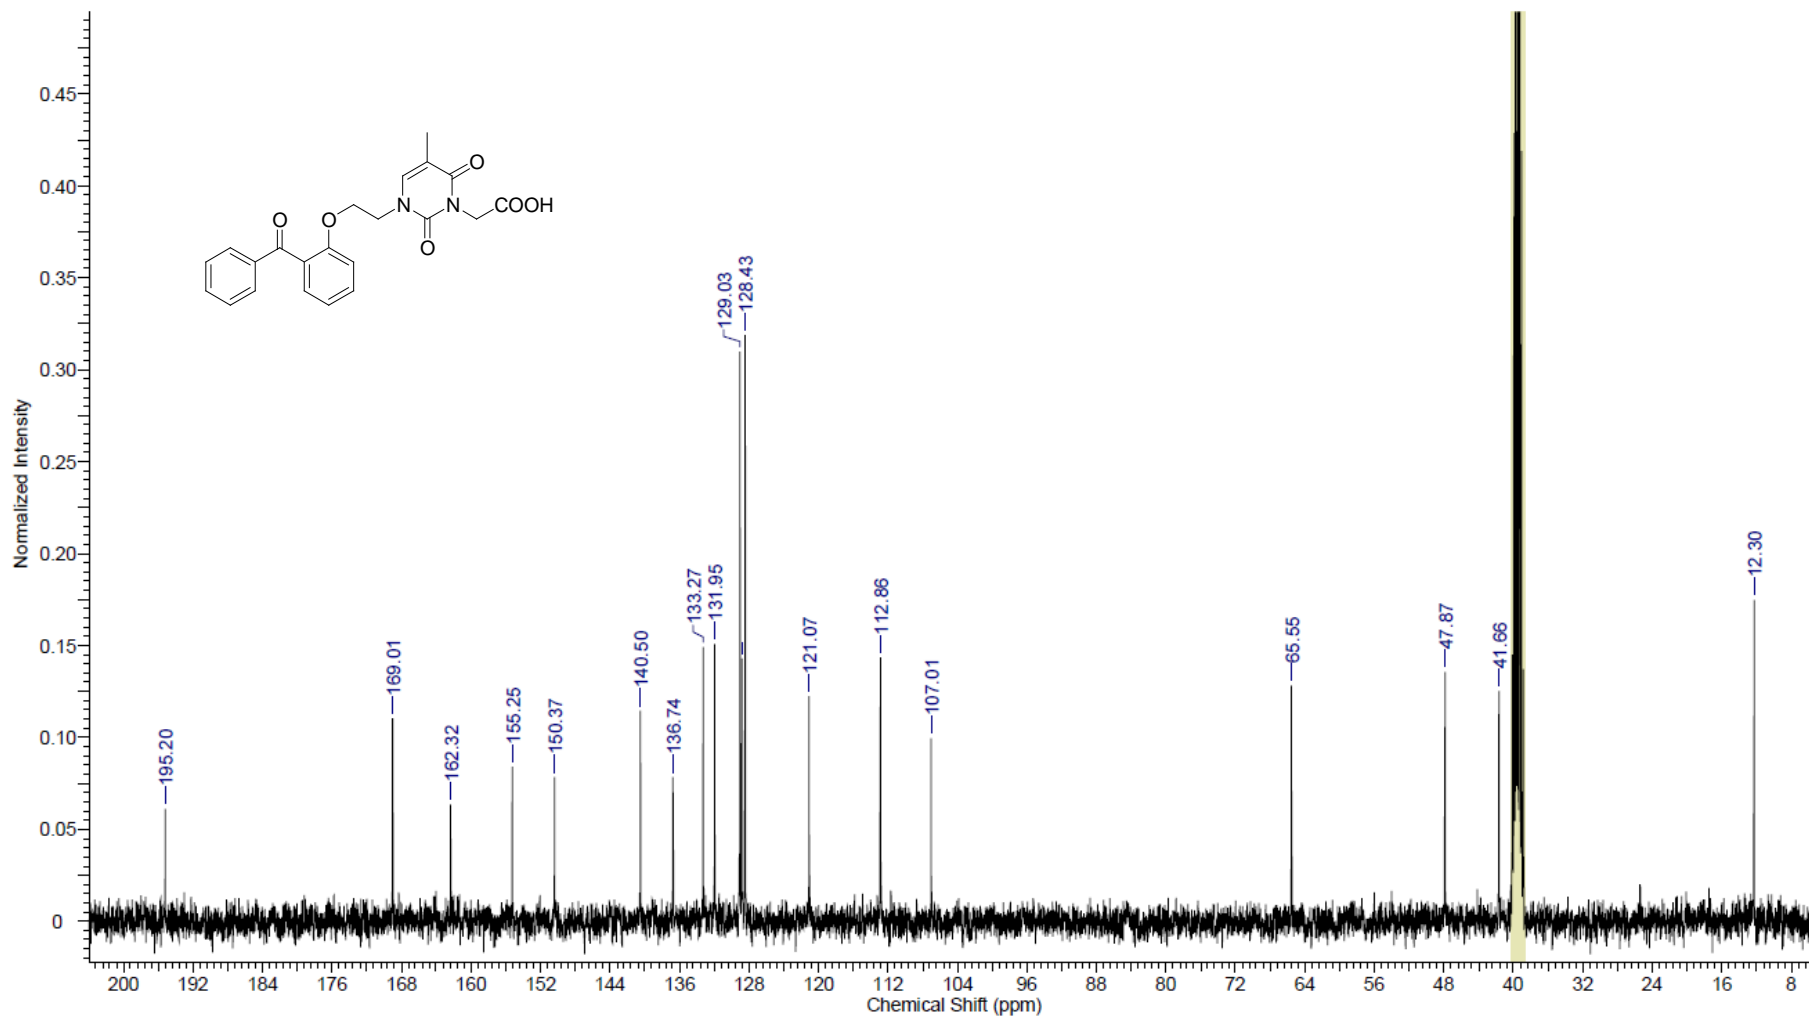

**Figure S16.**  $^{13}\text{C}$  NMR spectrum of compound **5b** in  $\text{DMSO-}d_6$  at 100 MHz.

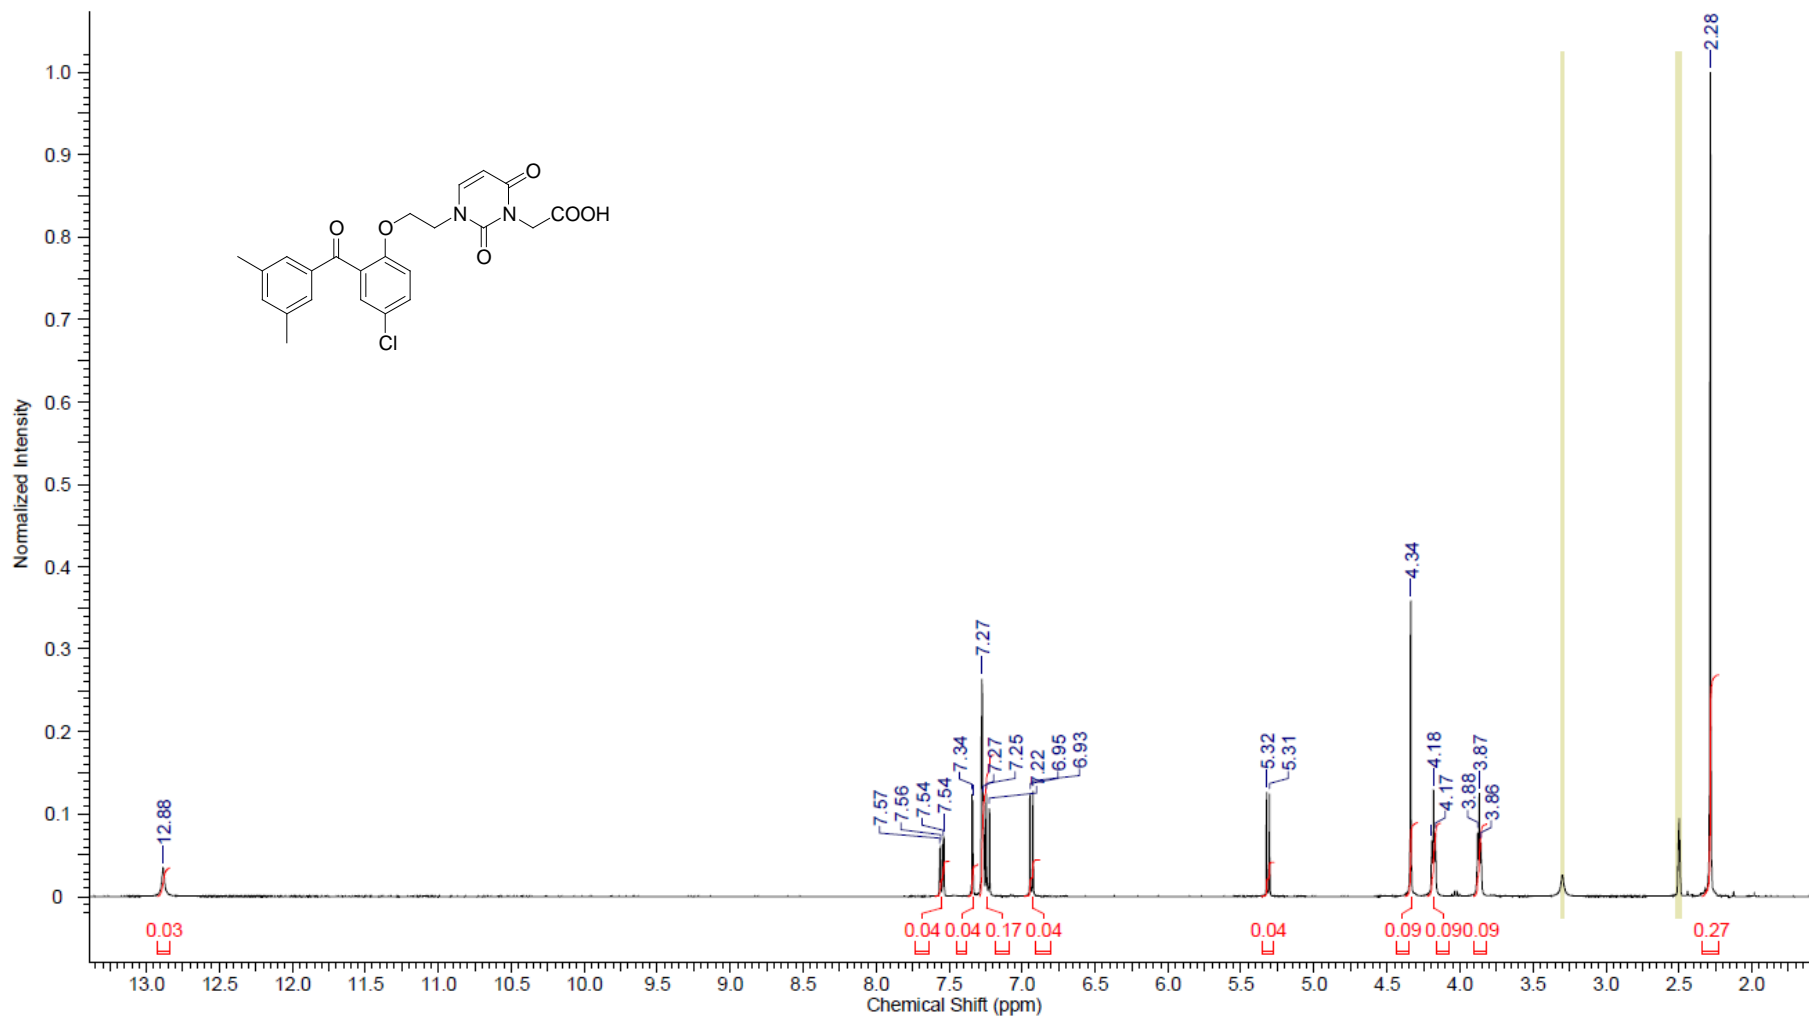

**Figure S17.**  $^1\text{H}$  NMR spectrum of compound **5c** in DMSO- $d_6$  at 400 MHz.



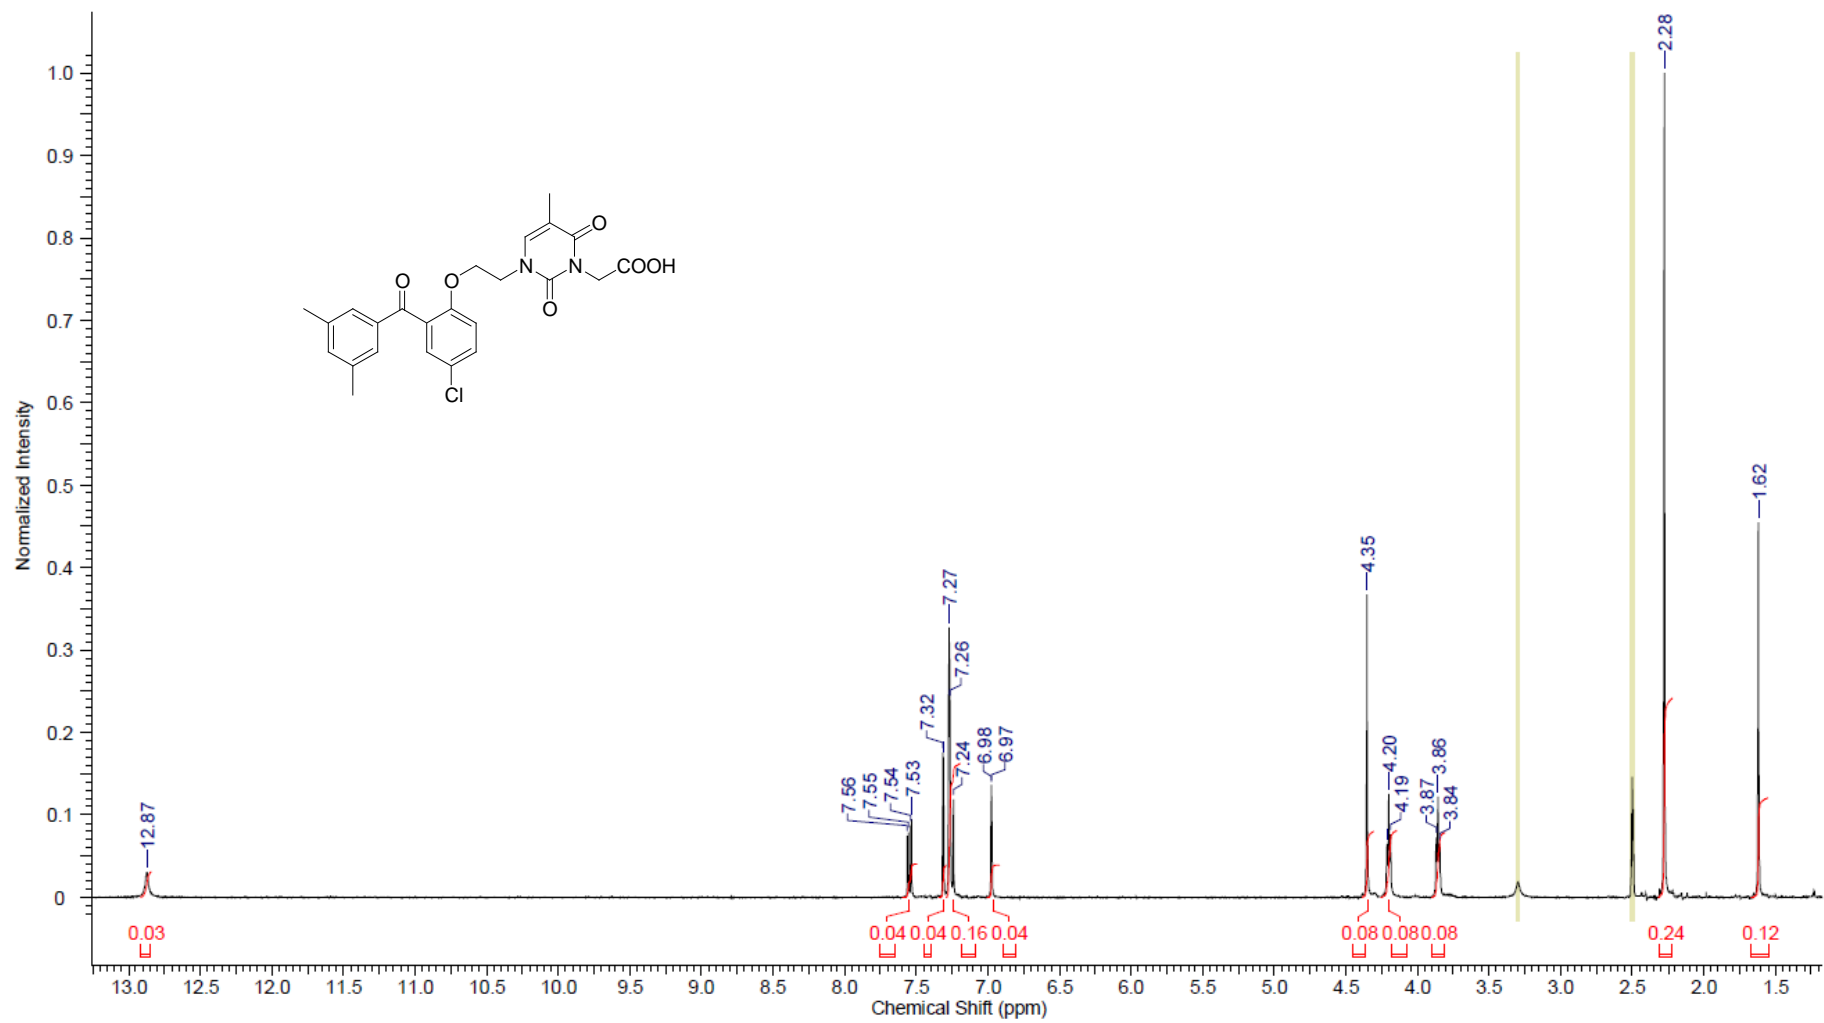

Figure S19.  $^1\text{H}$  NMR spectrum of compound **5d** in DMSO- $d_6$  at 400 MHz.

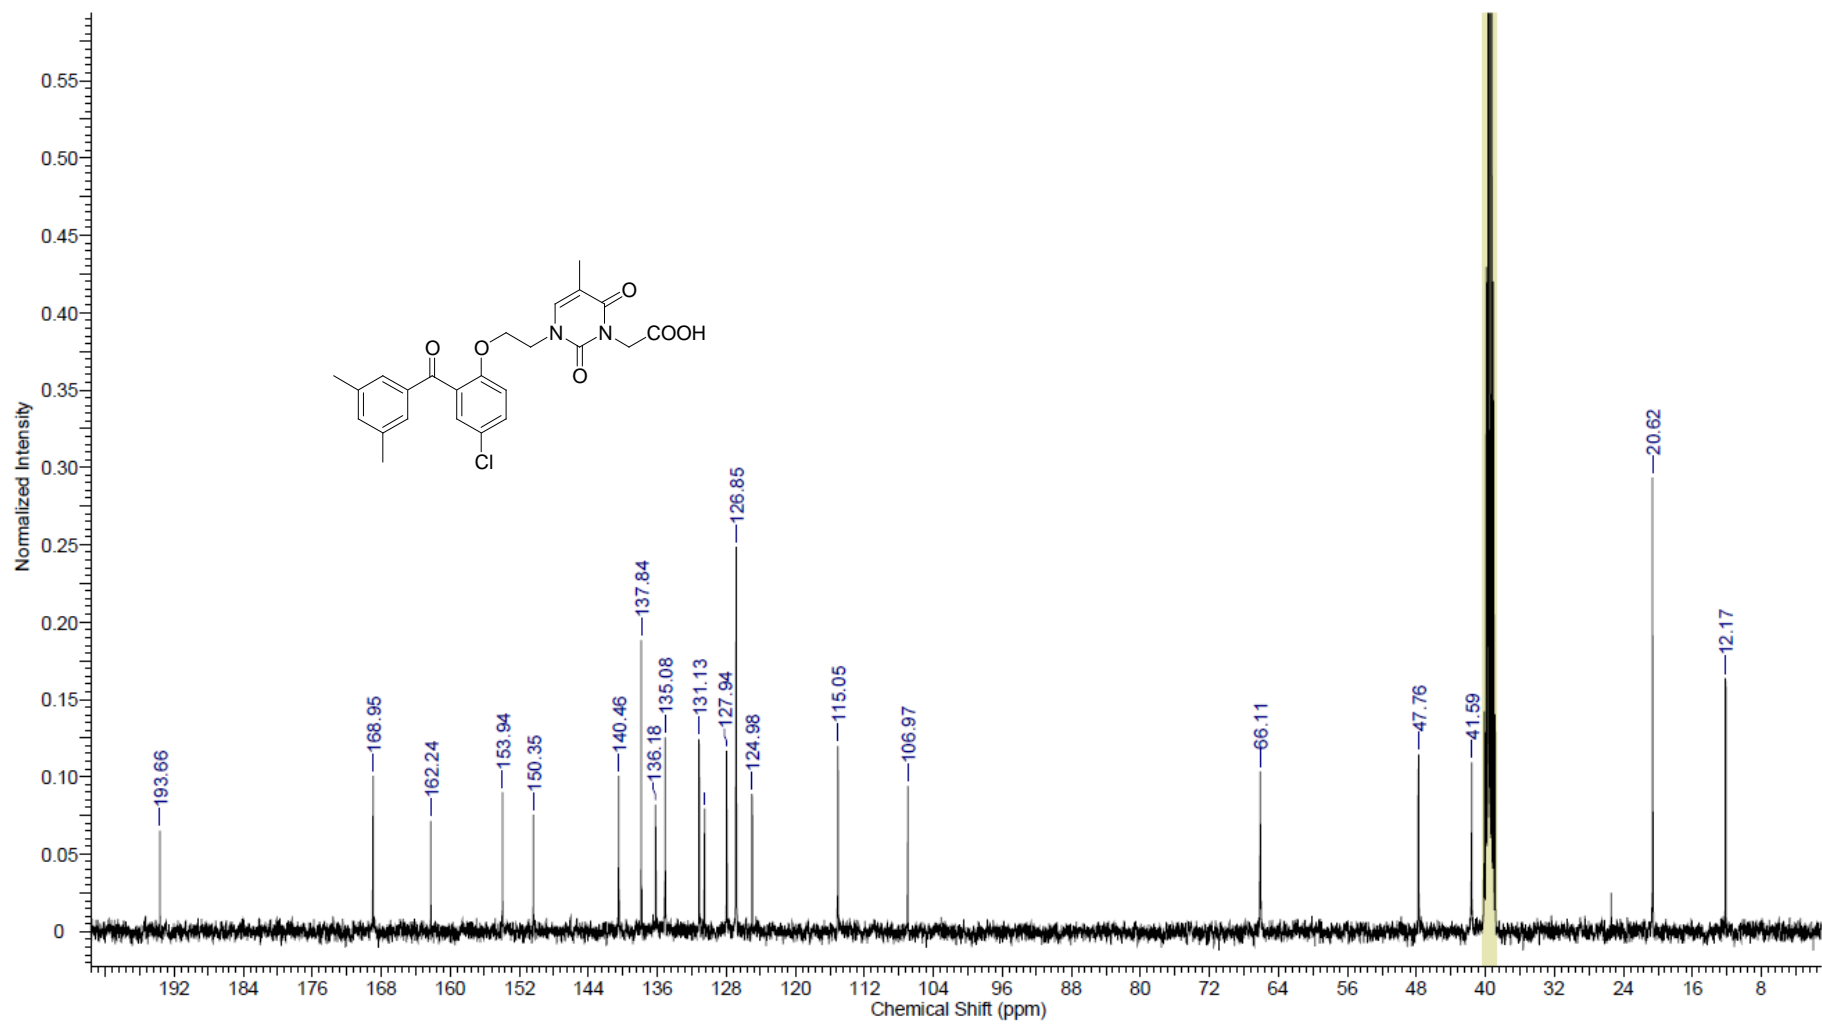

**Figure S20.**  $^{13}\text{C}$  NMR spectrum of compound **5d** in  $\text{DMSO-}d_6$  at 100 MHz.

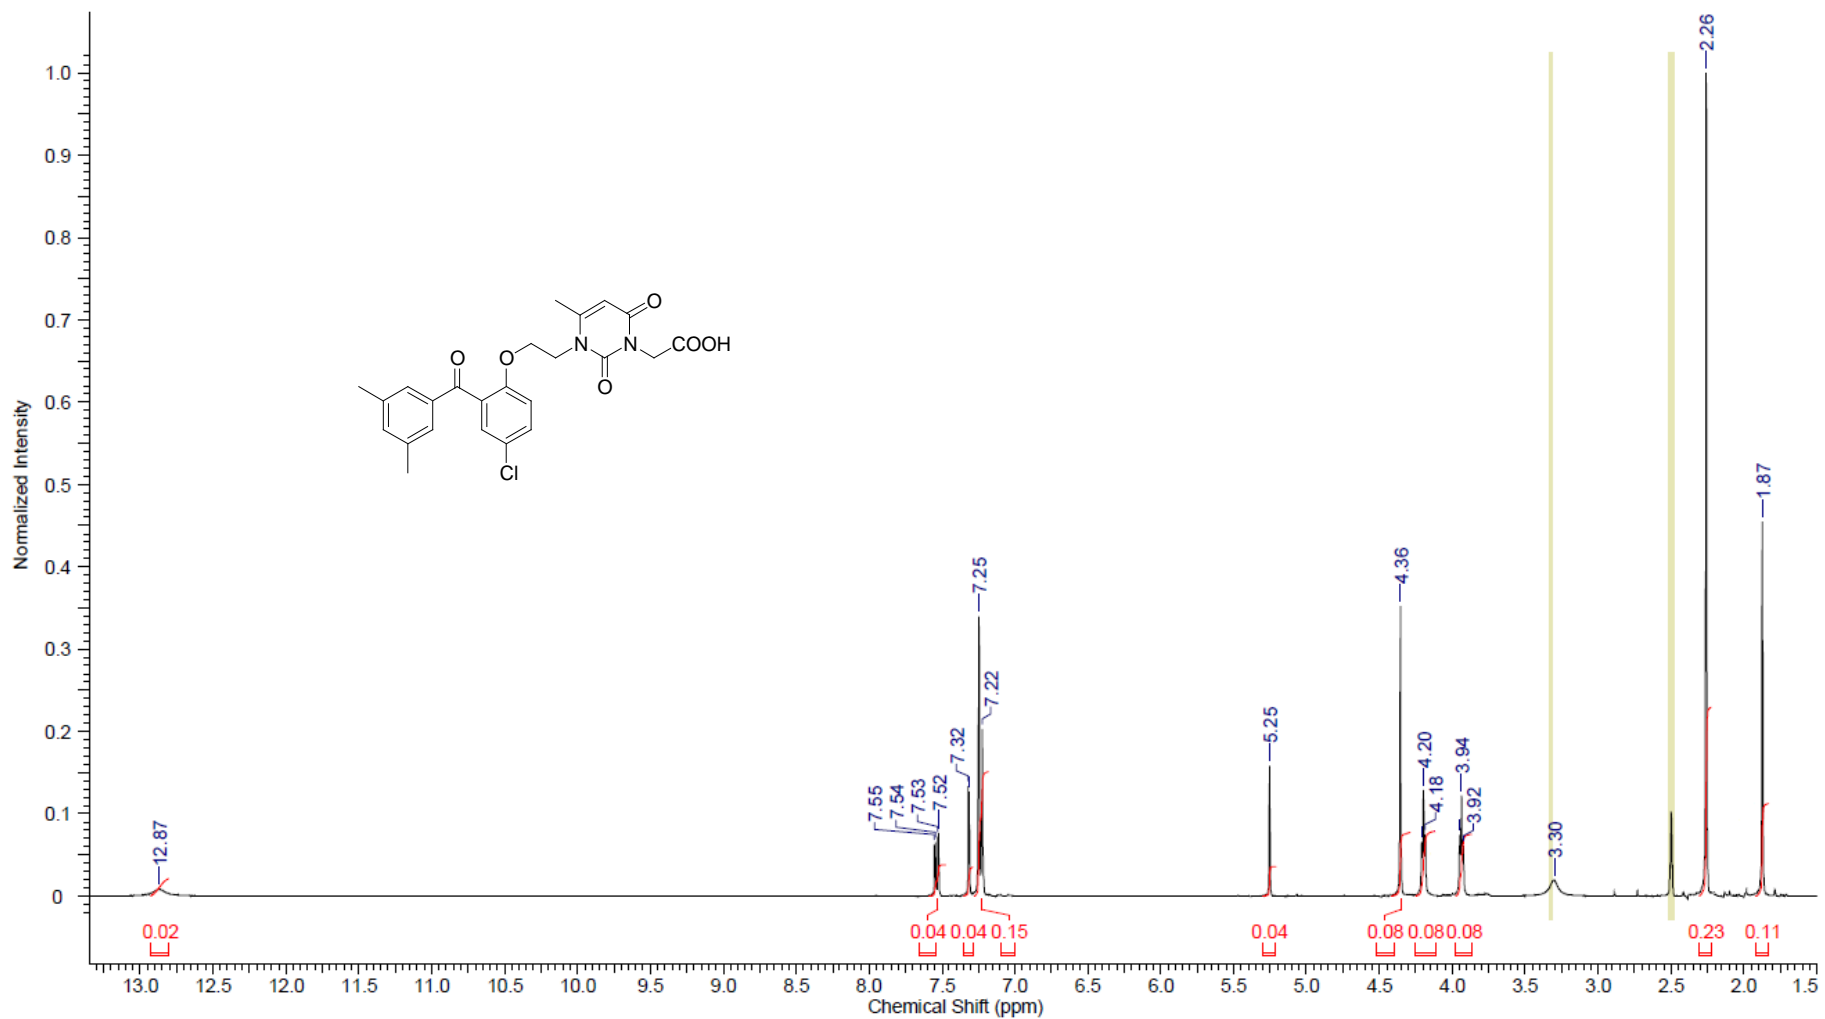

**Figure S21.**  $^1\text{H}$  NMR spectrum of compound **5e** in  $\text{DMSO-}d_6$  at 400 MHz.

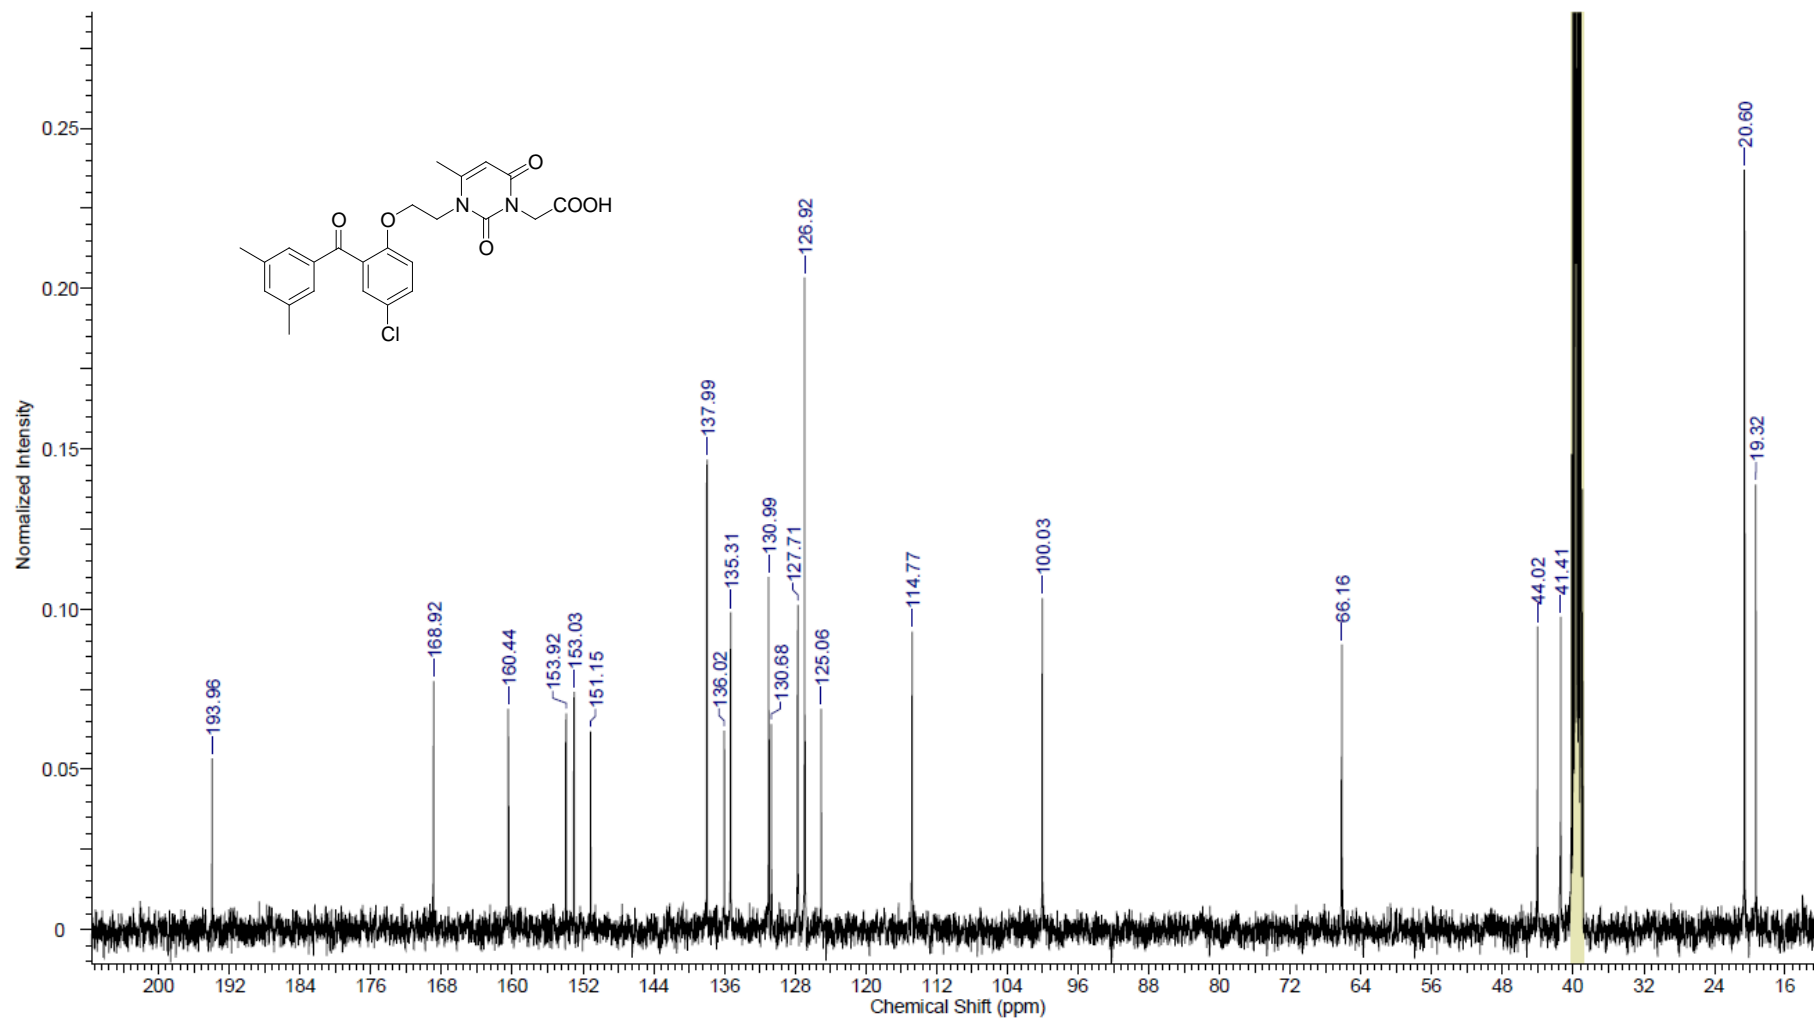

**Figure S22.** <sup>13</sup>C NMR spectrum of compound **5e** in DMSO-*d*<sub>6</sub> at 100 MHz.



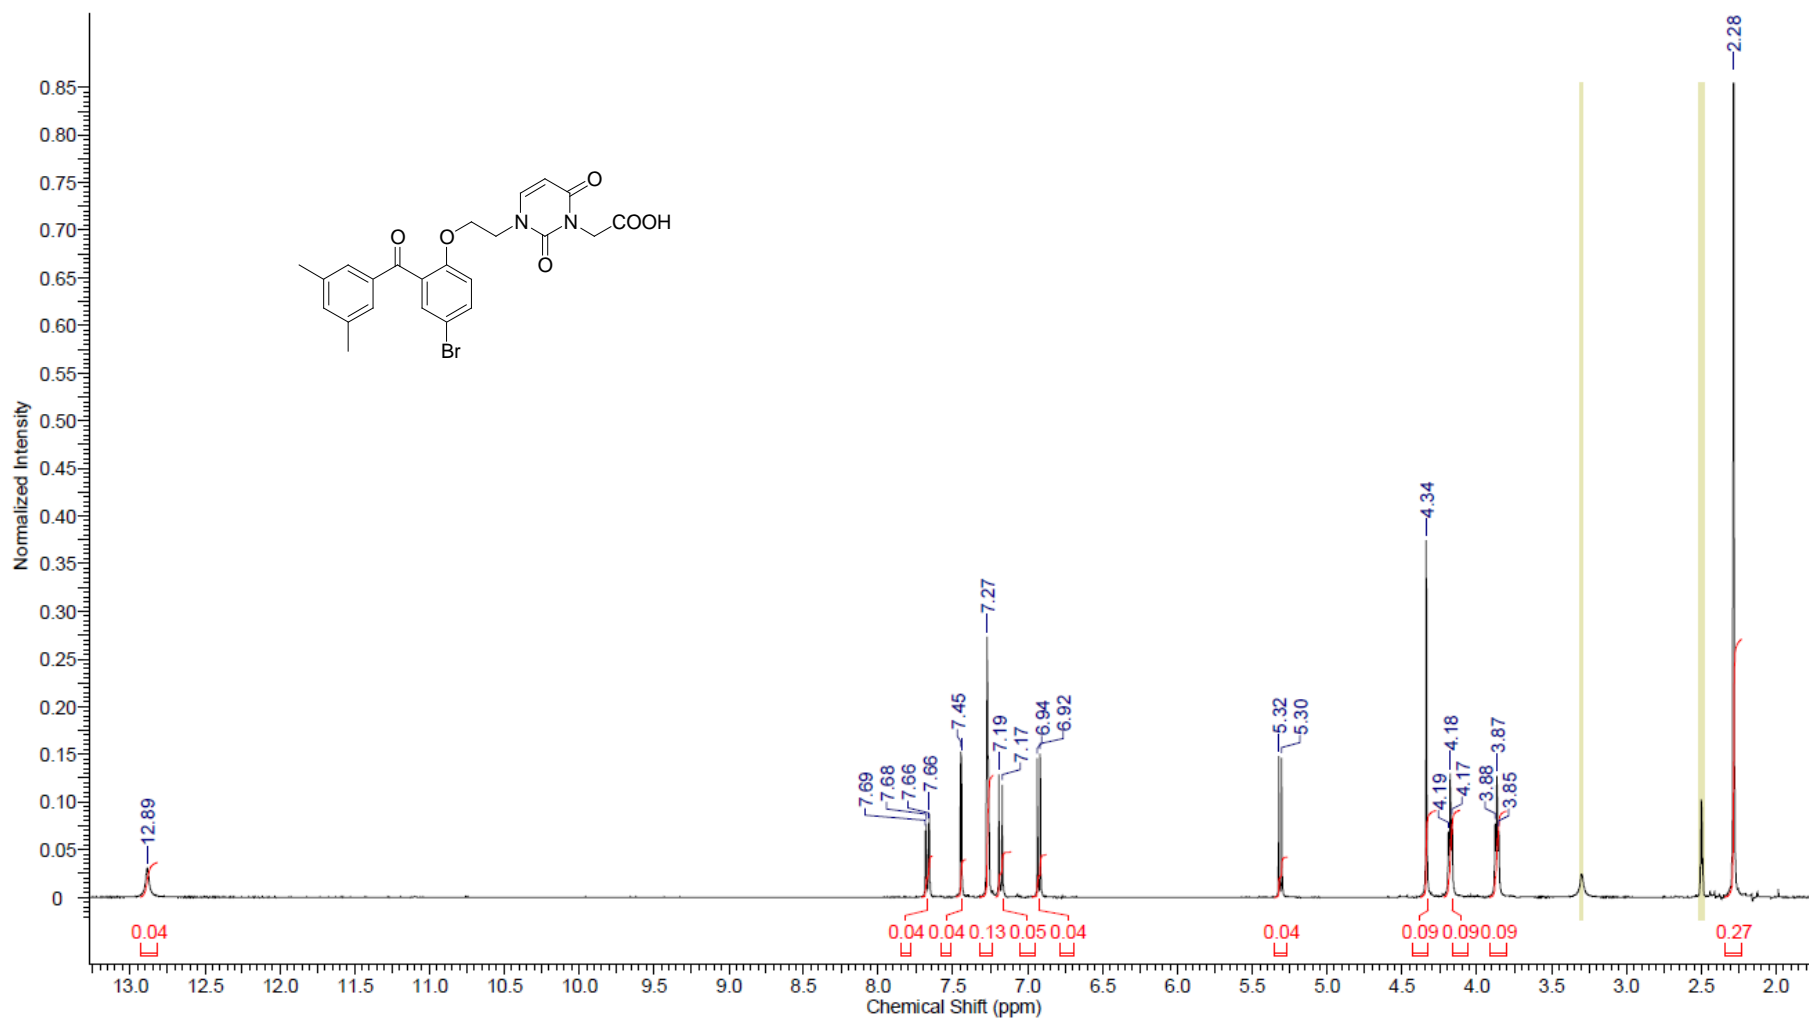

**Figure S23.**  $^1\text{H}$  NMR spectrum of compound **5f** in  $\text{DMSO-}d_6$  at 400 MHz.

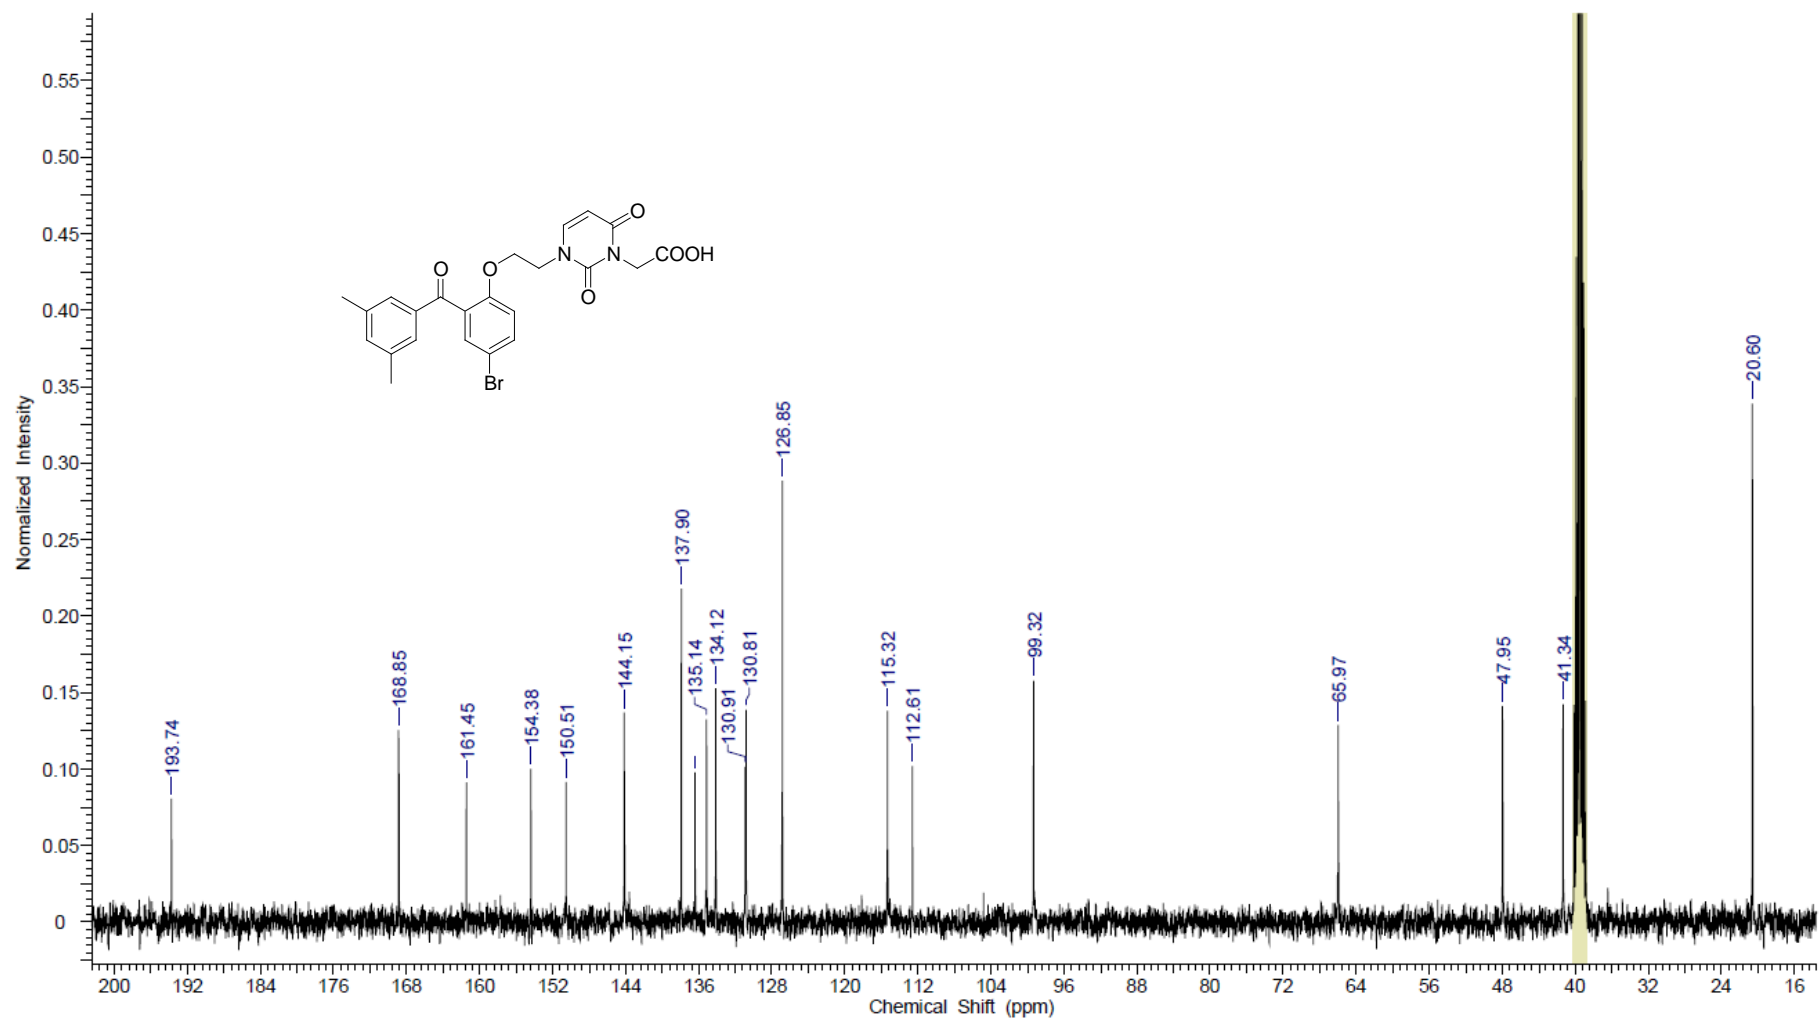

**Figure S24.** <sup>13</sup>C NMR spectrum of compound **5f** in DMSO-*d*<sub>6</sub> at 100 MHz.

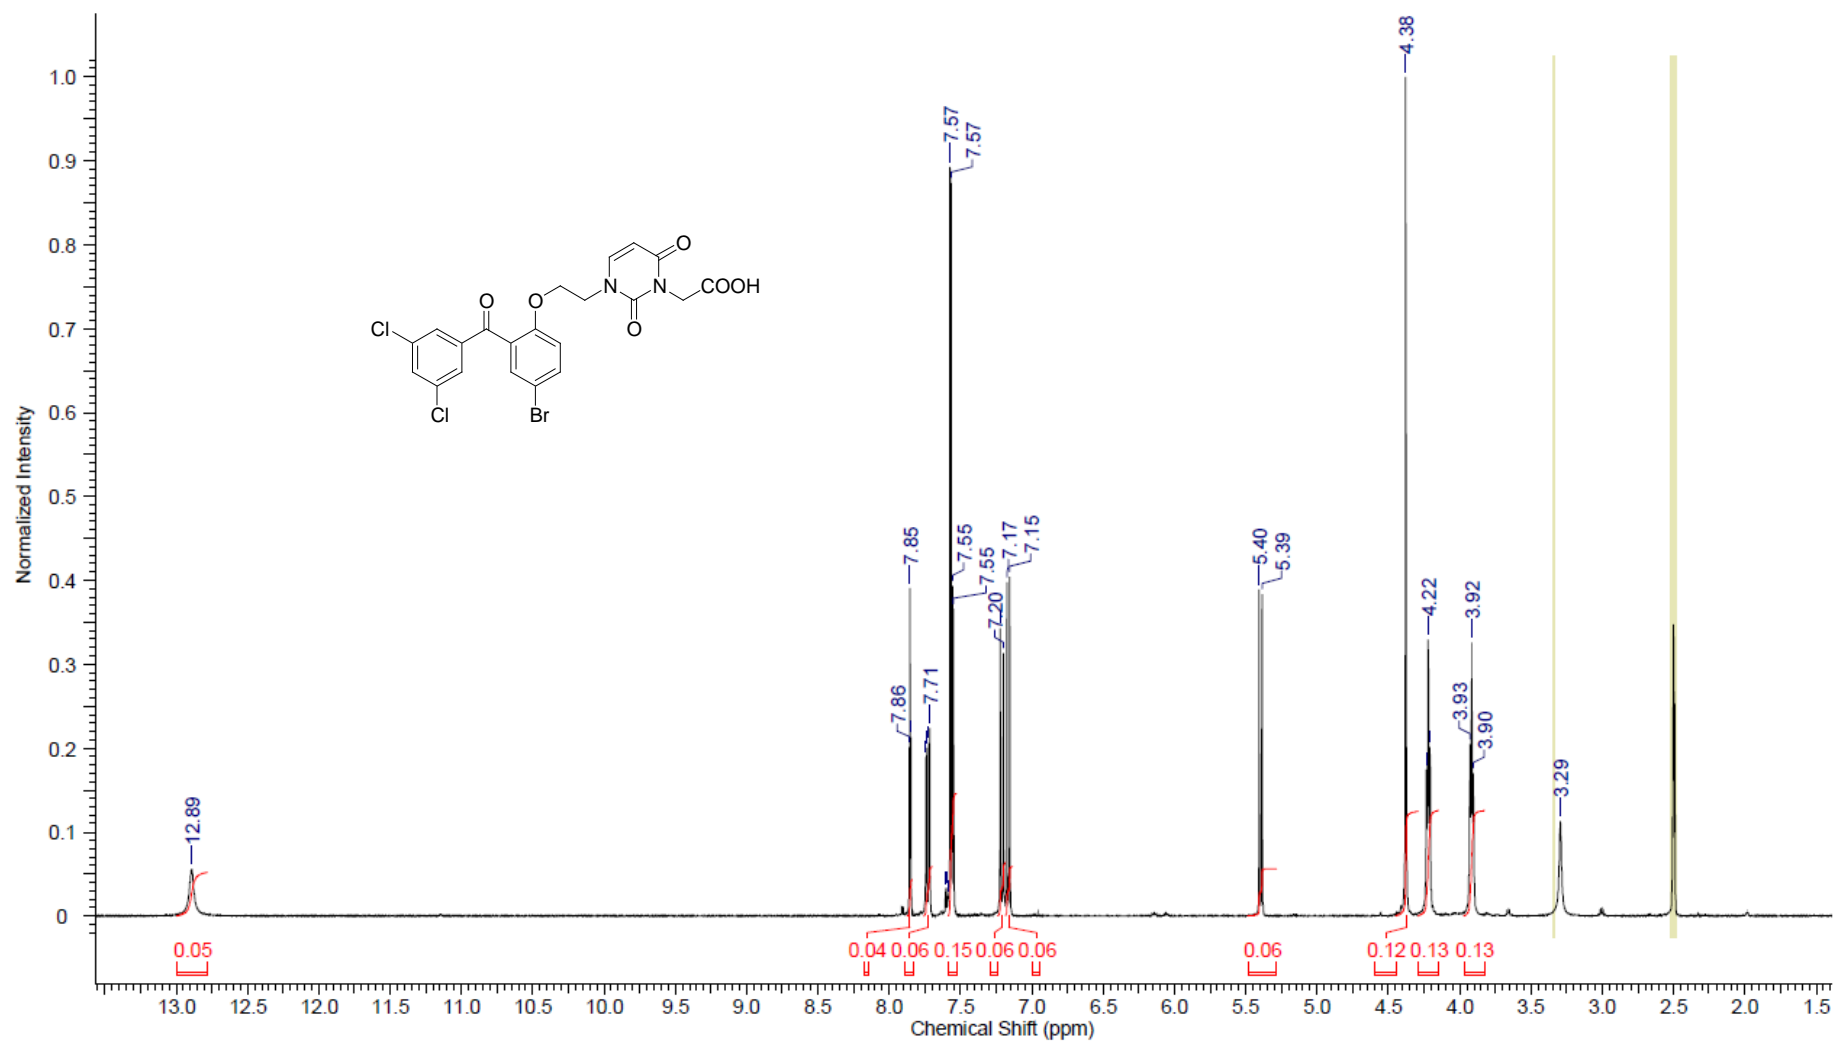

**Figure S25.** <sup>1</sup>H NMR spectrum of compound **5g** in DMSO-*d*<sub>6</sub> at 400 MHz.

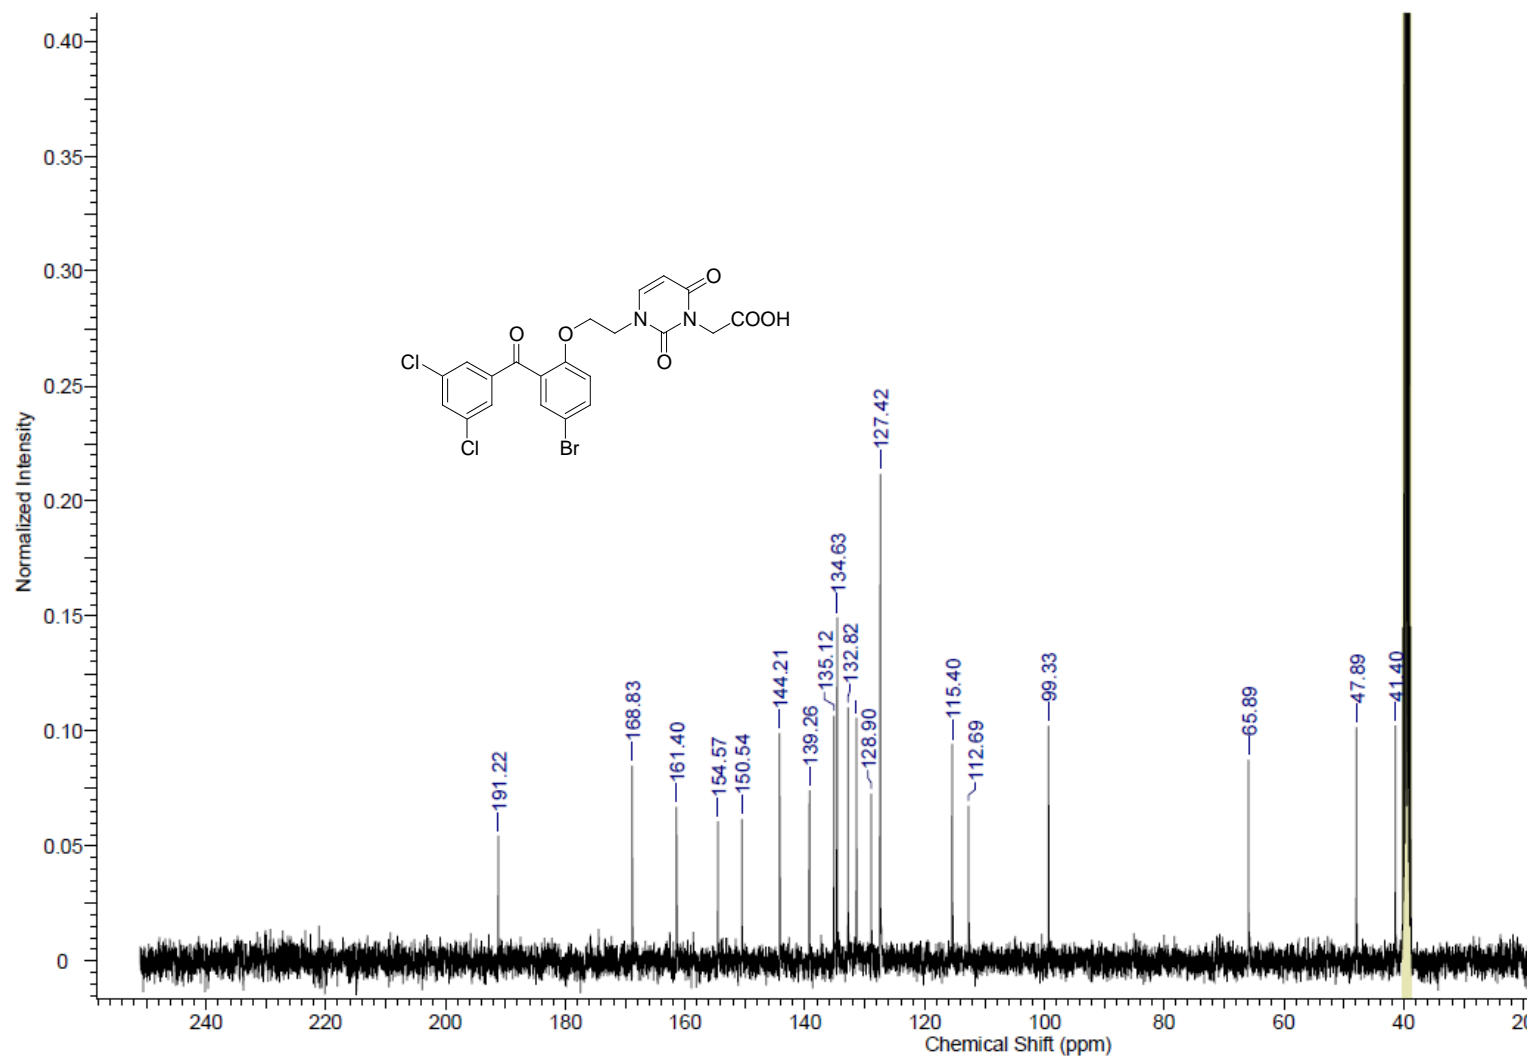

**Figure S26.** <sup>13</sup>C NMR spectrum of compound **5g** in DMSO-*d*<sub>6</sub> at 100 MHz.

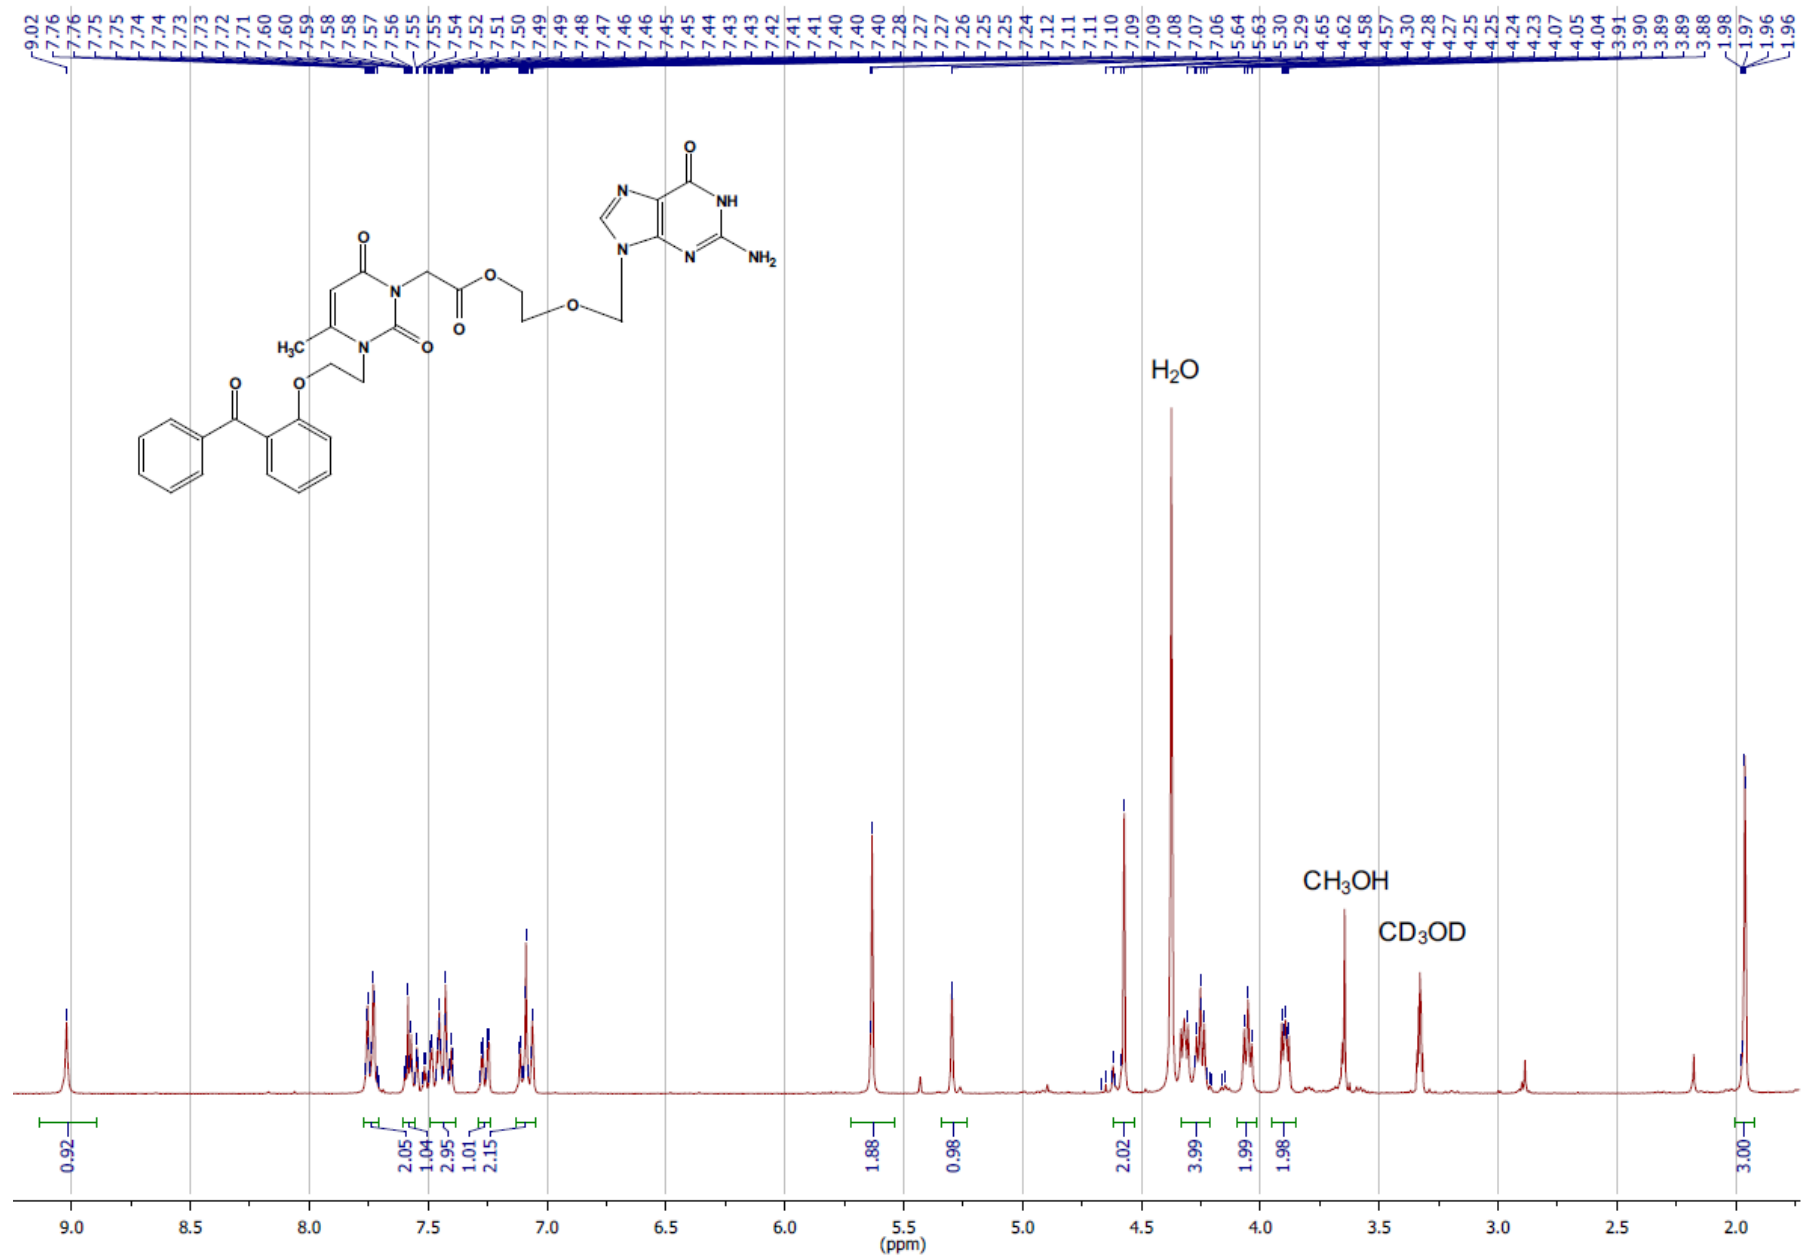

Figure S27.  $^1\text{H}$  NMR spectrum of compound **2a** in  $\text{CD}_3\text{OD}$  at 400 MHz.

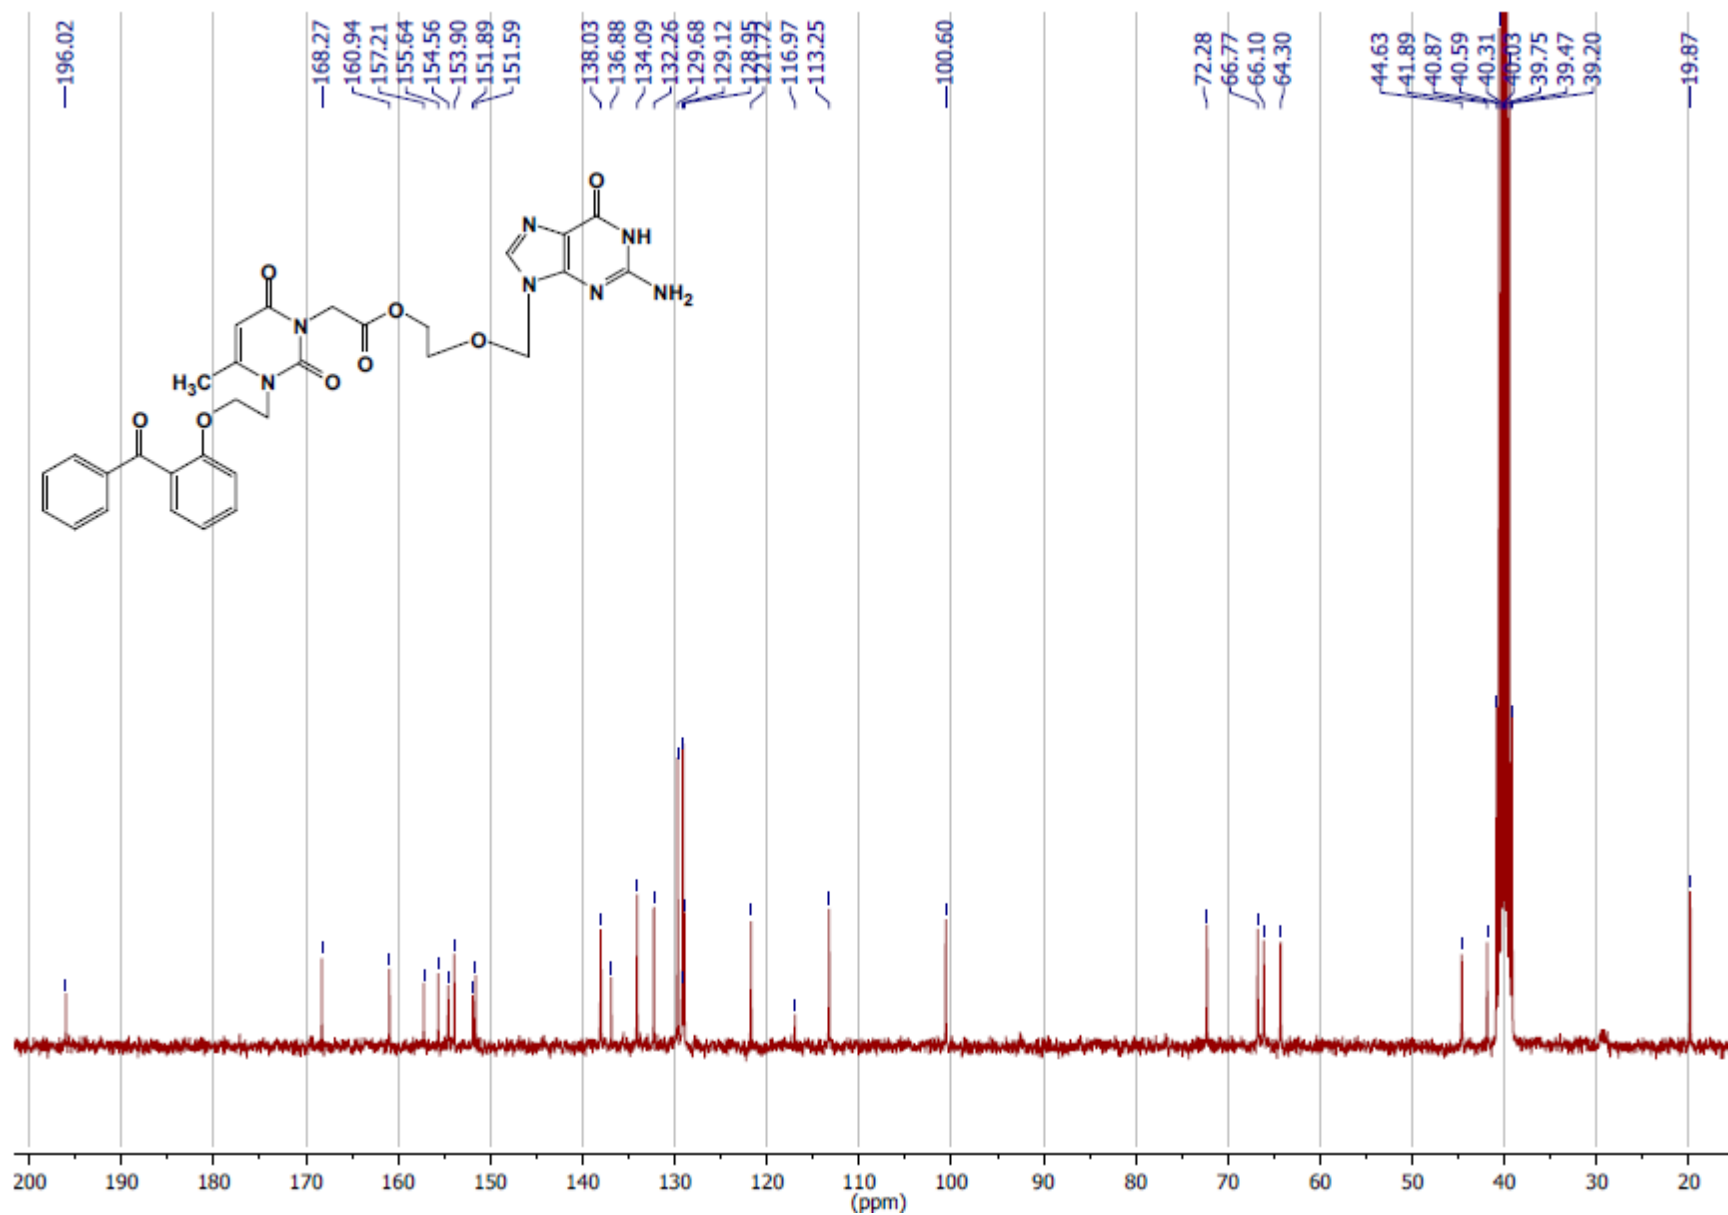

**Figure S28.**  $^{13}\text{C}$  NMR spectrum of compound **2a** in  $\text{DMSO-d}_6$  at 100 MHz.

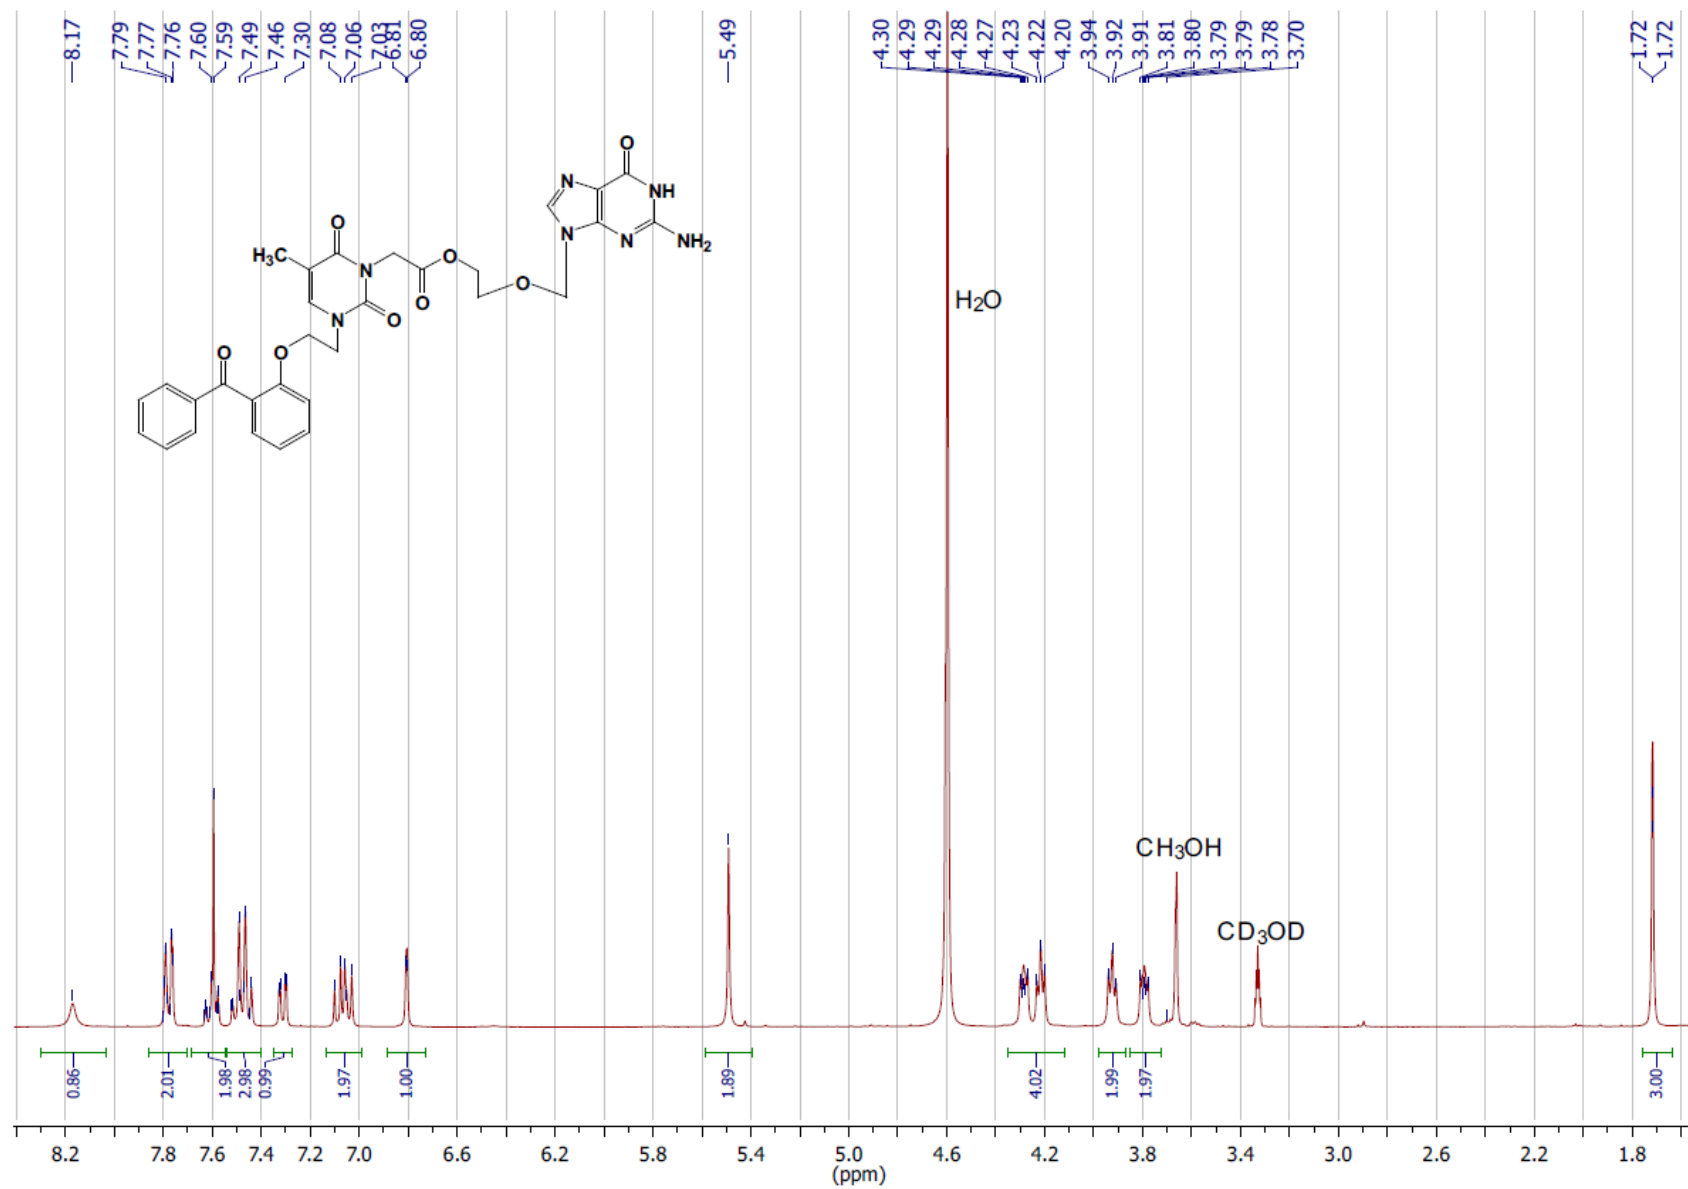

**Figure S29.** <sup>1</sup>H NMR spectrum of compound **2b** in CD<sub>3</sub>OD at 400 MHz.

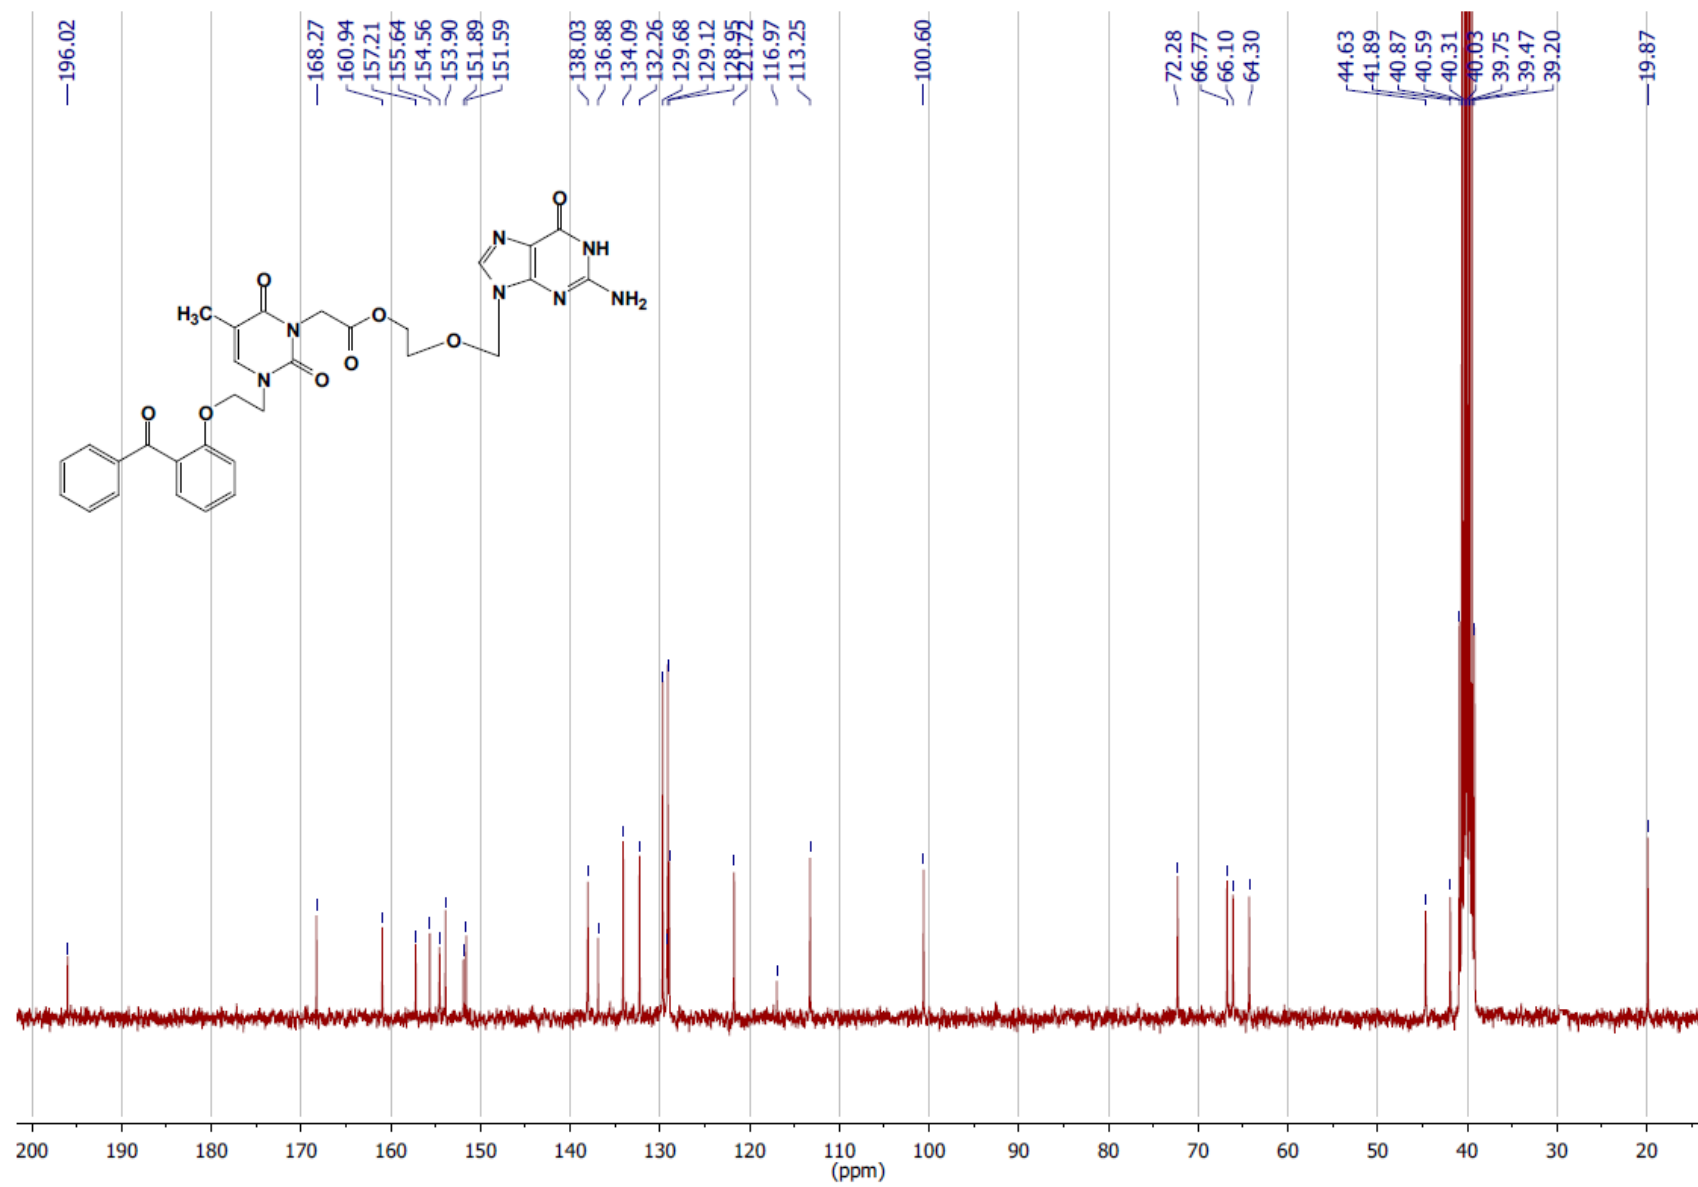

**Figure S30.** <sup>13</sup>C NMR spectrum of compound **2b** in DMSO-d<sub>6</sub> at 100 MHz.



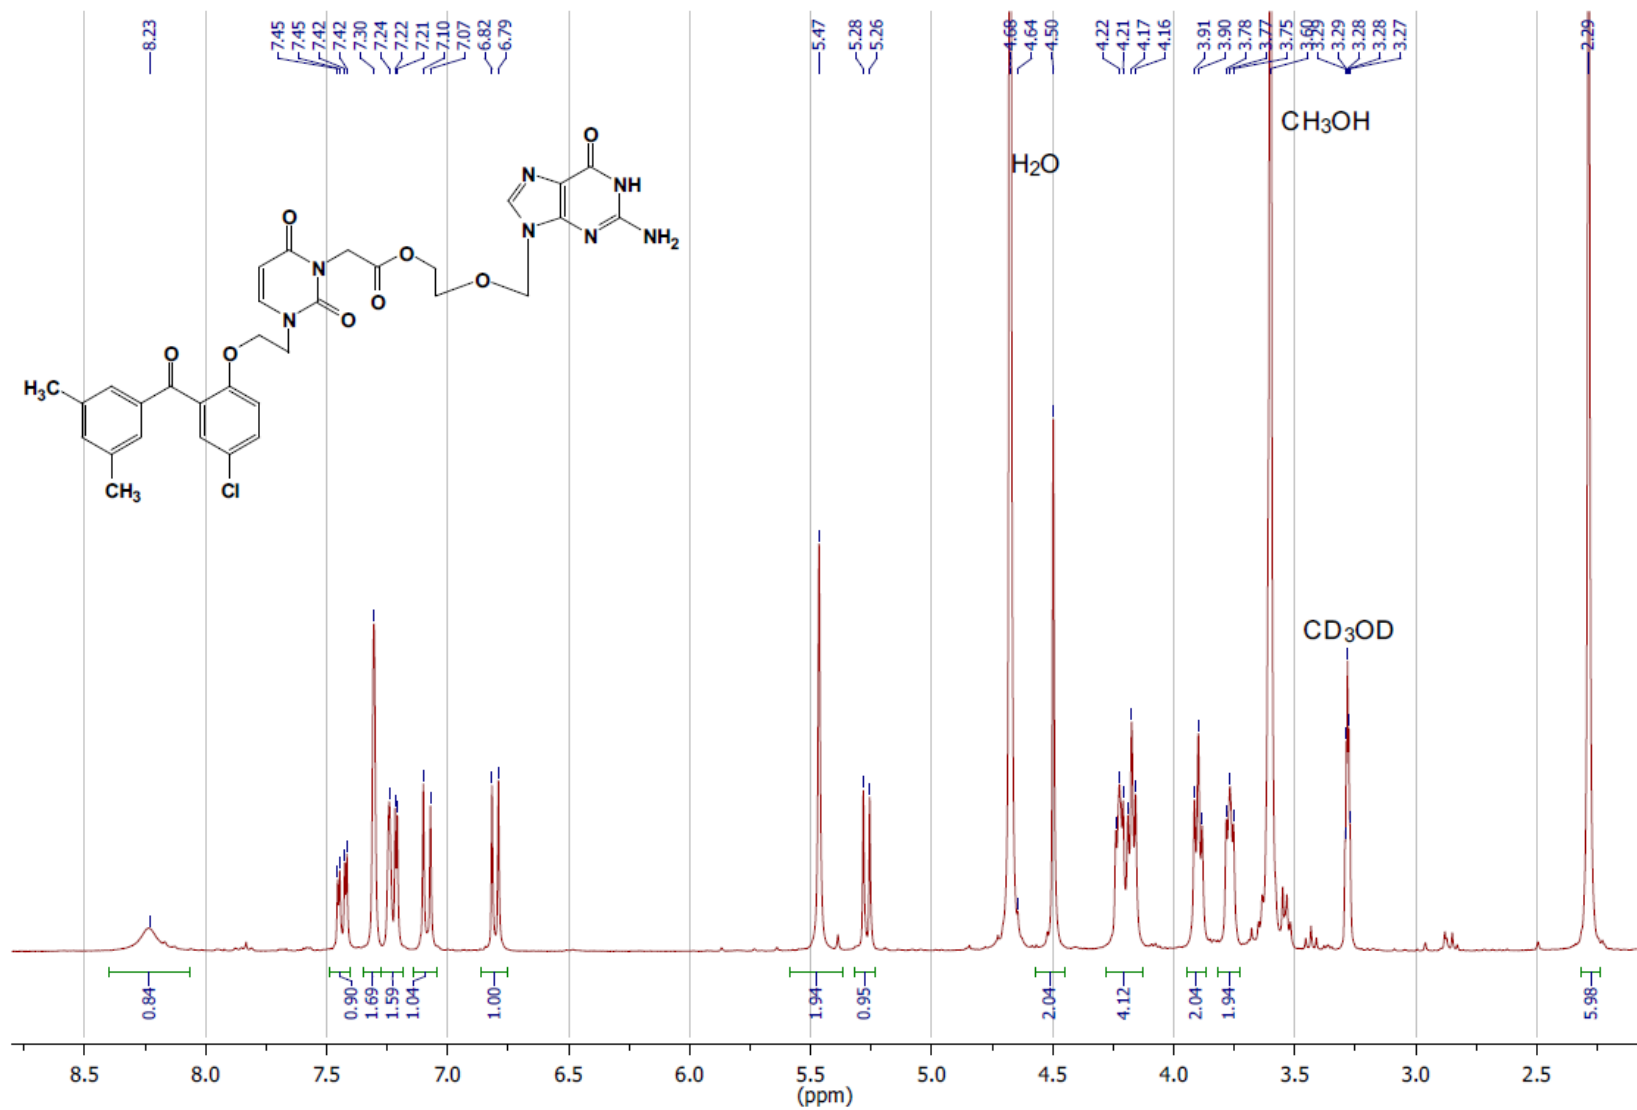

**Figure S31.**  $^1\text{H}$  NMR spectrum of compound **2c** in  $\text{CD}_3\text{OD}$  at 400 MHz.

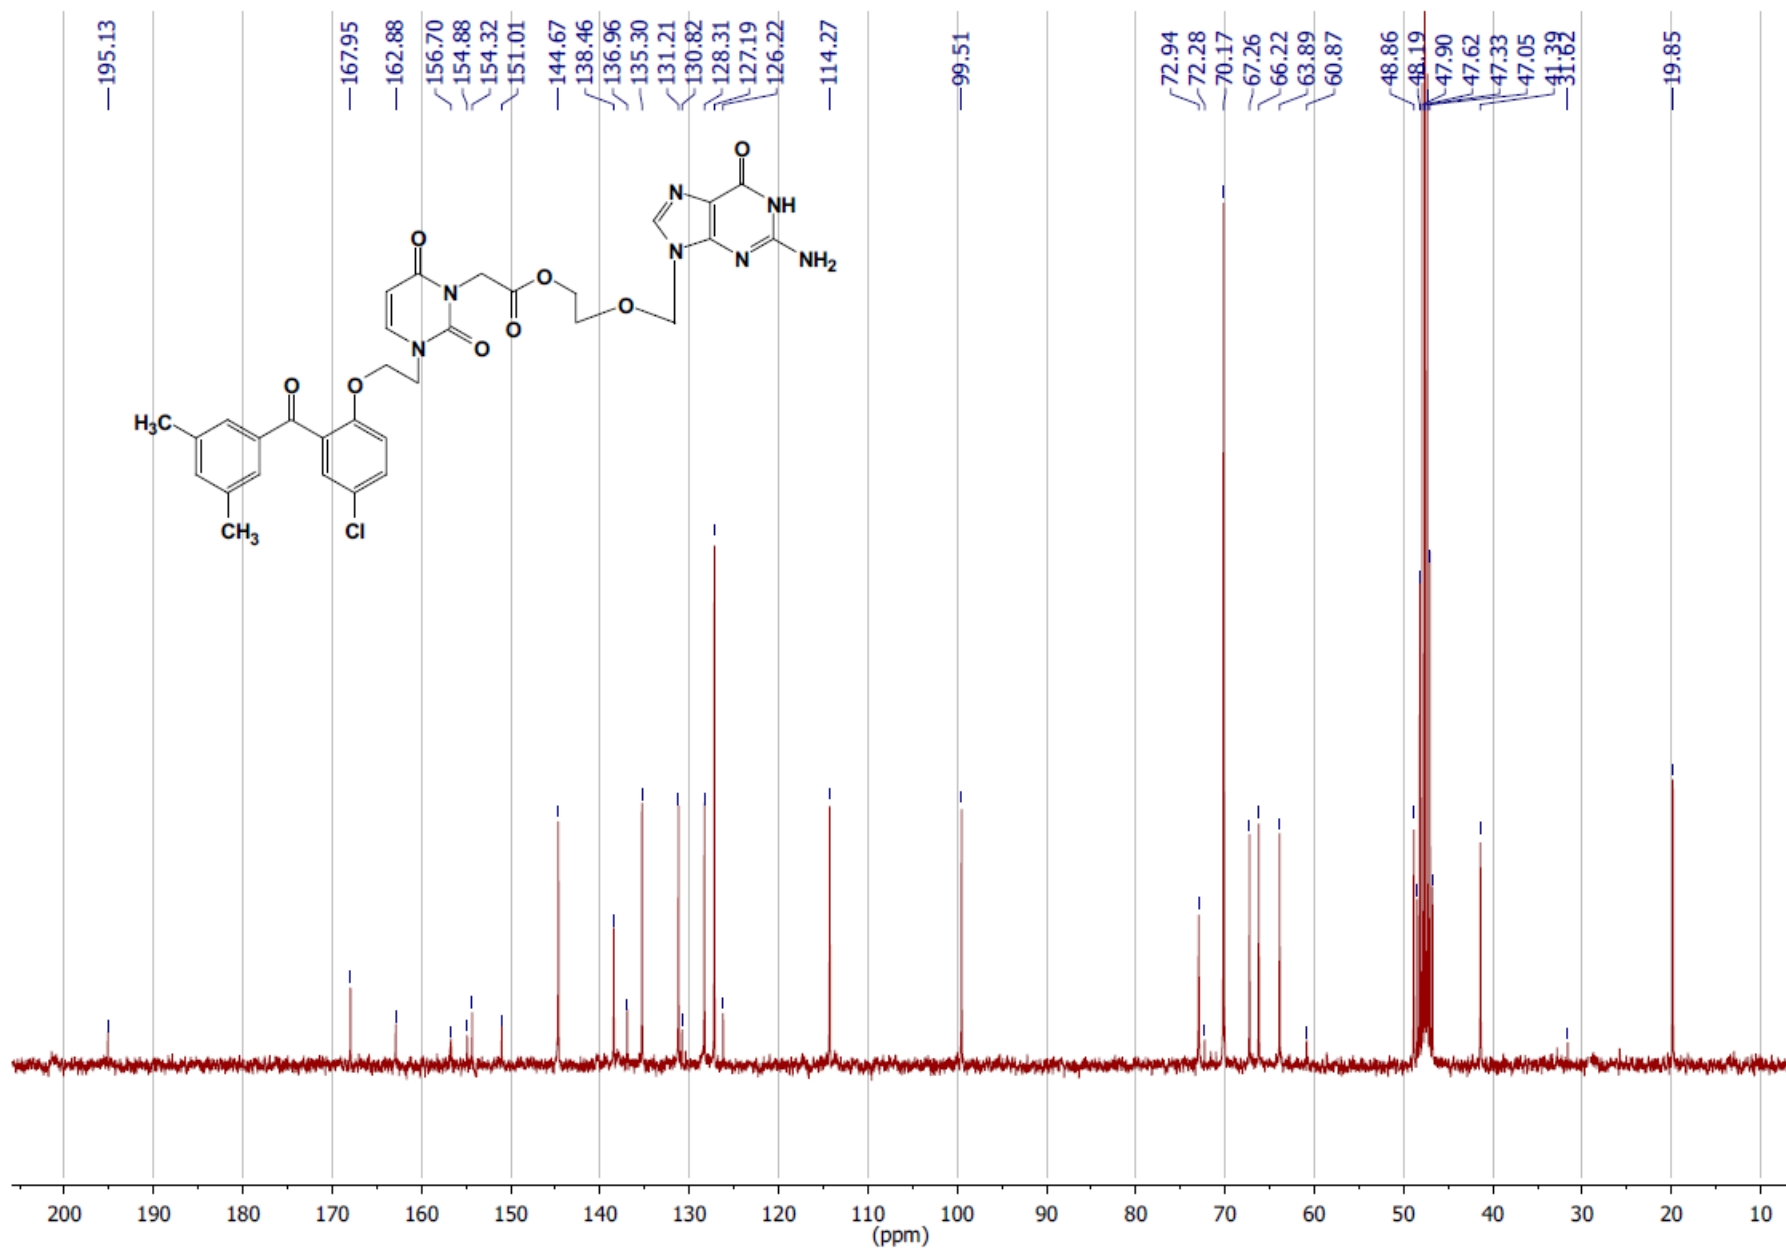

**Figure S32.** <sup>13</sup>C NMR spectrum of compound **2c** in CD<sub>3</sub>OD at 100 MHz.

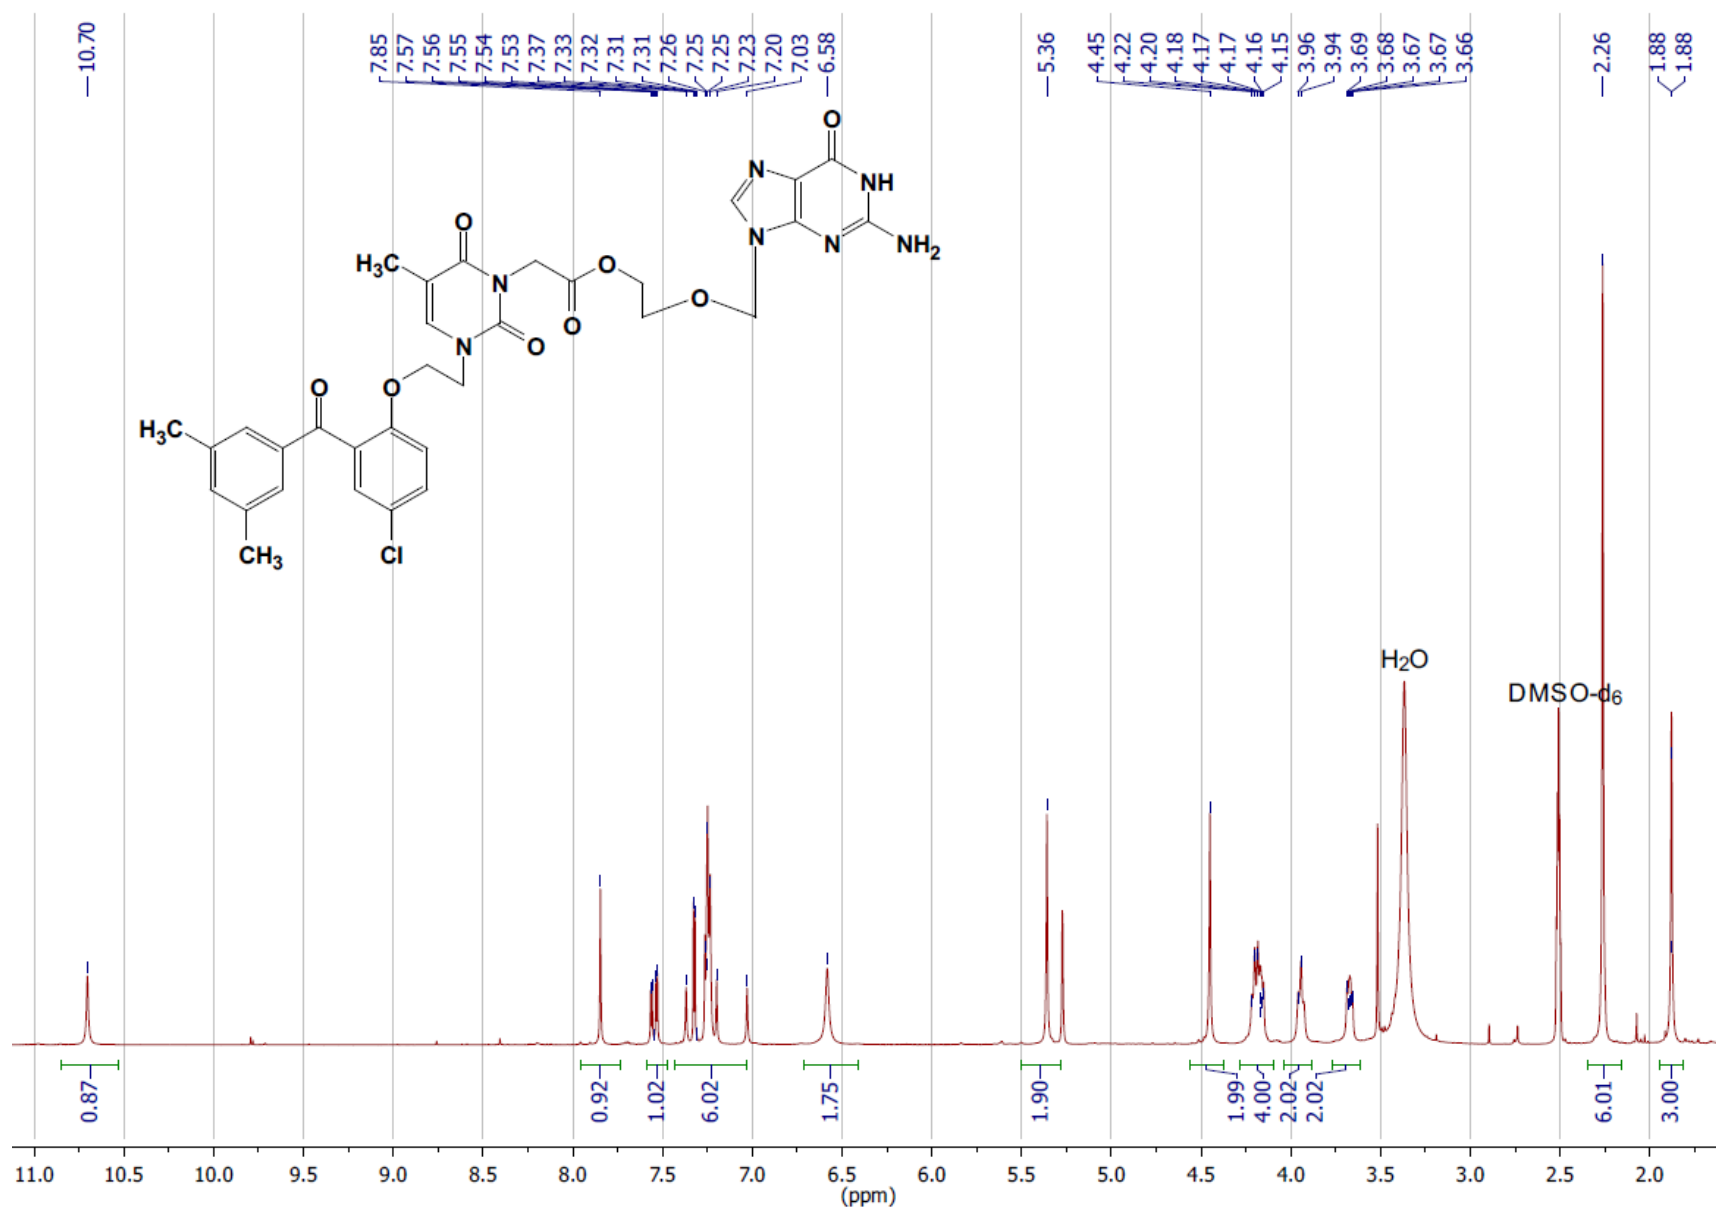

**Figure S33.** <sup>1</sup>H NMR spectrum of compound **2d** in DMSO-d<sub>6</sub> at 400 MHz.

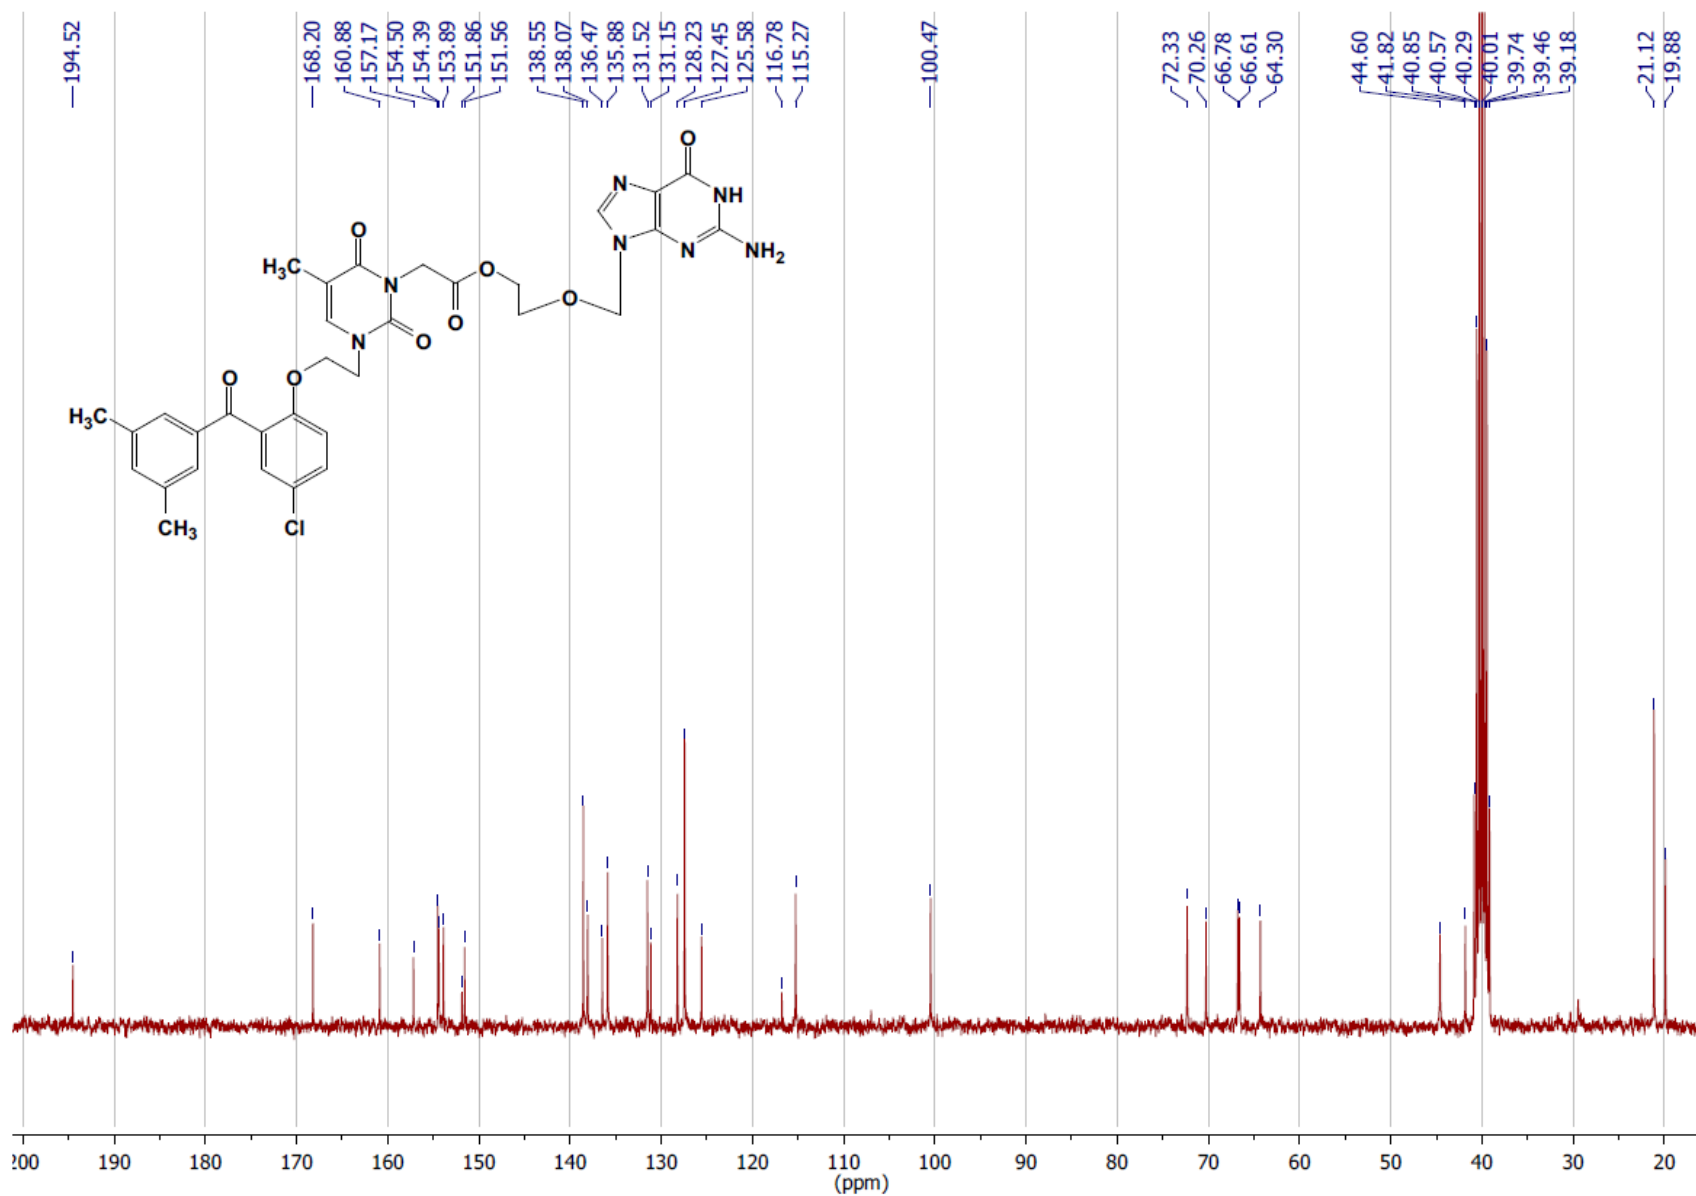

**Figure S34.**  $^{13}\text{C}$  NMR spectrum of compound **2d** in  $\text{DMSO-d}_6$  at 100 MHz.

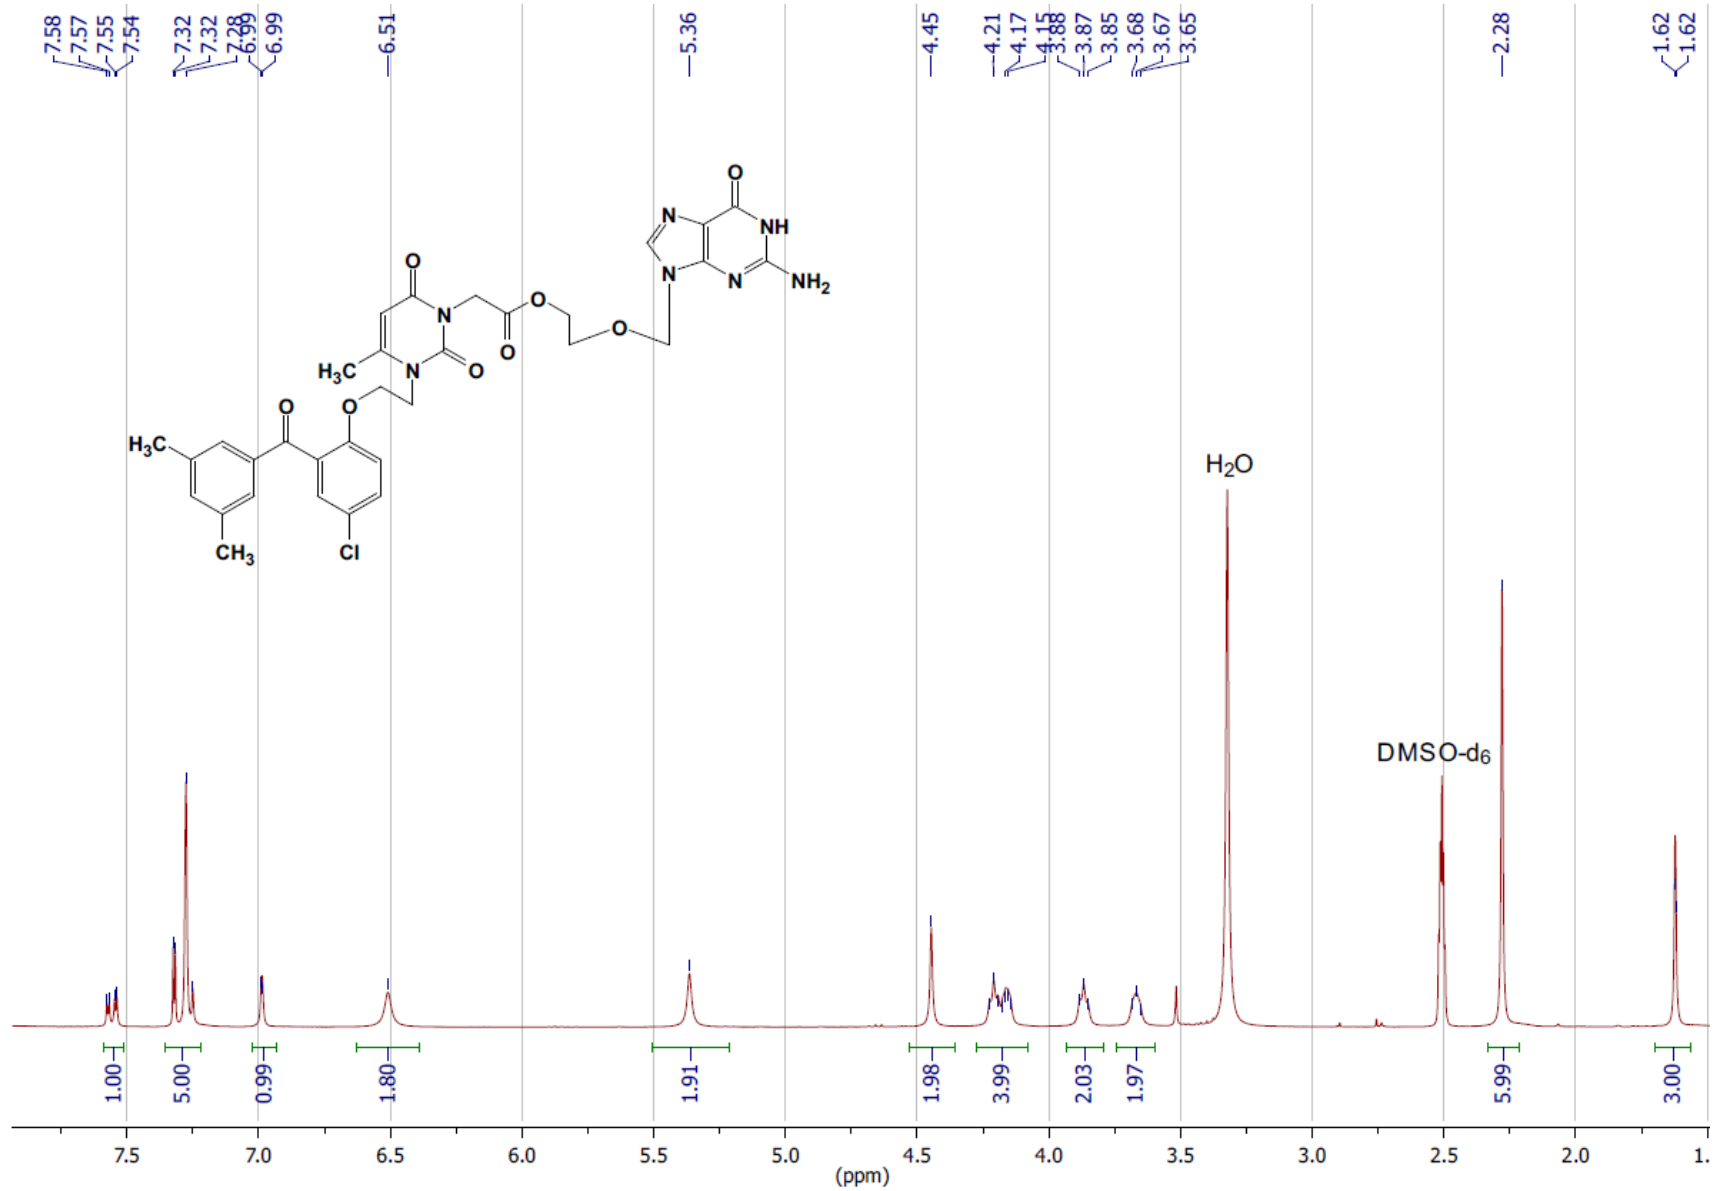

Figure S35.  $^1\text{H}$  NMR spectrum of compound **2e** in DMSO- $d_6$  at 400 MHz.

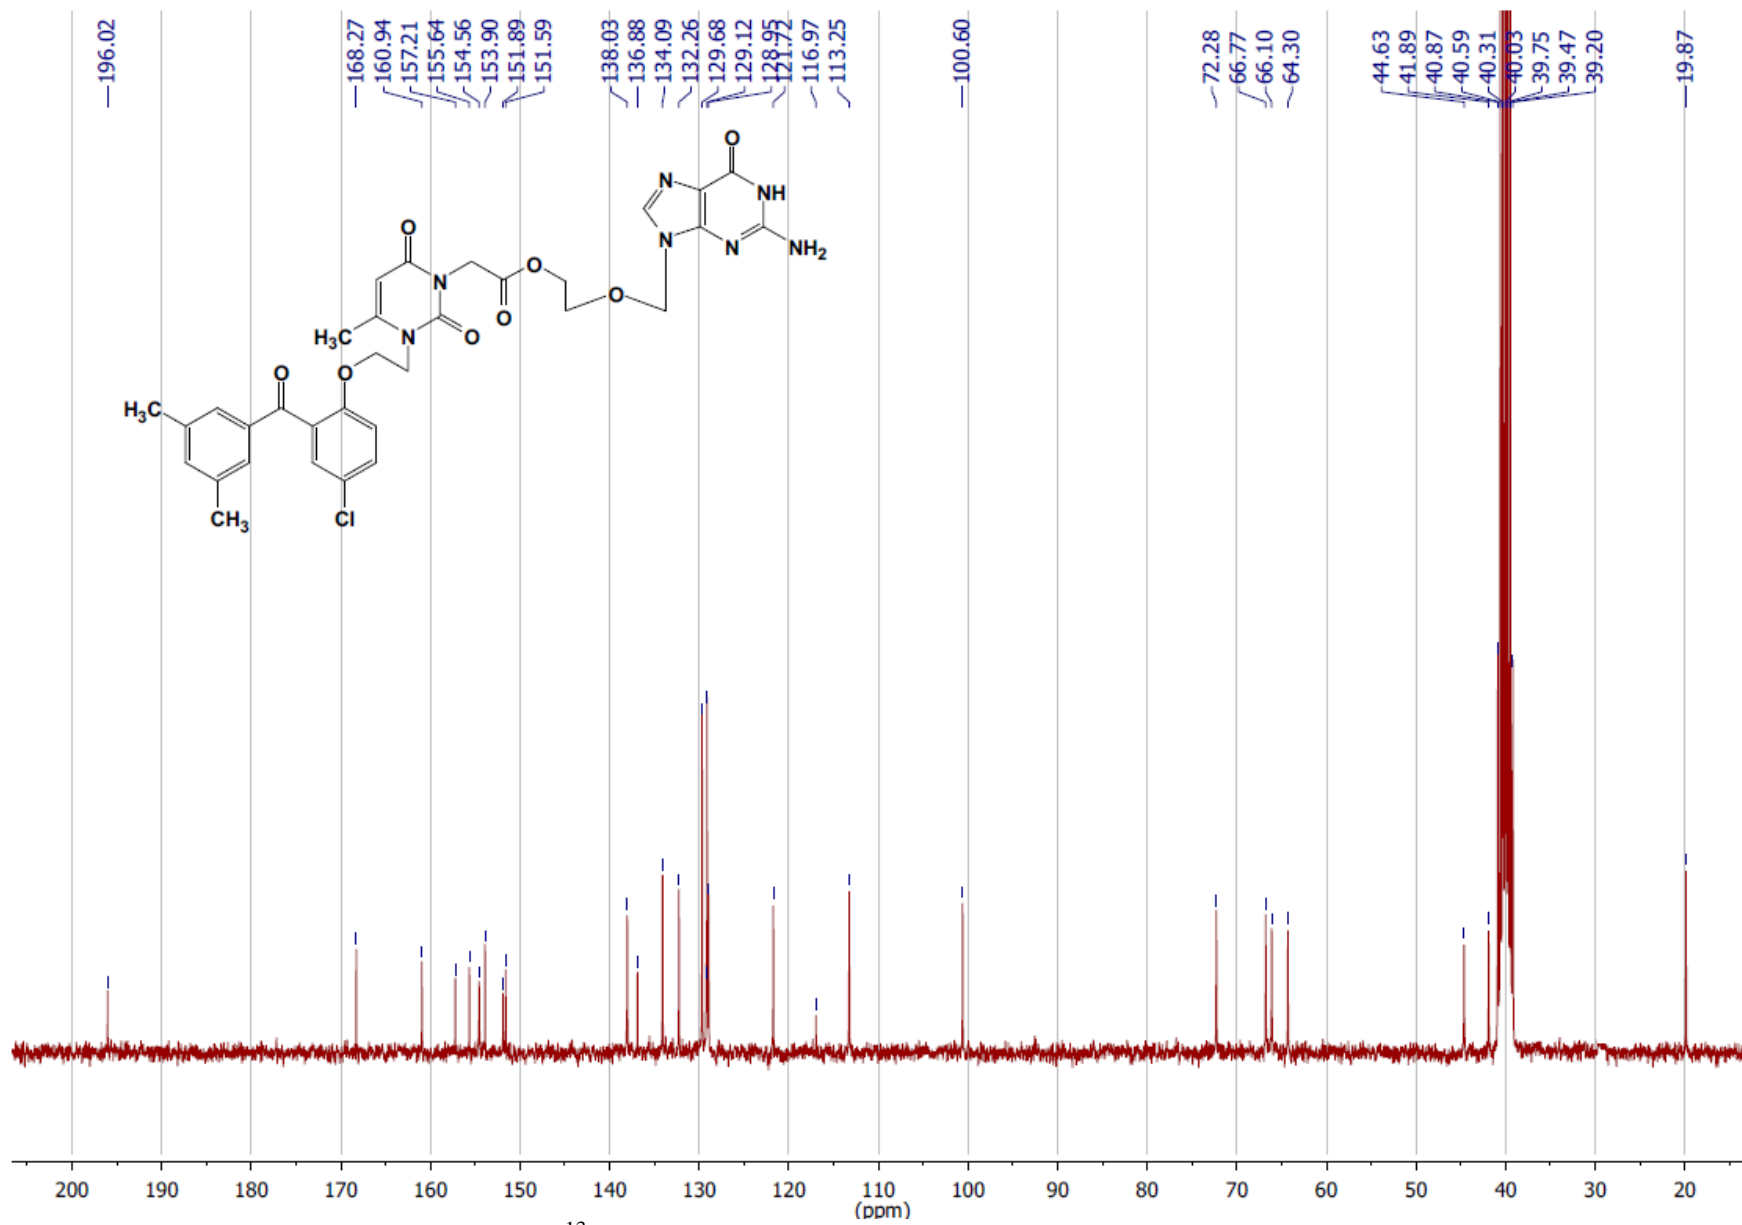

Figure S36.  $^{13}\text{C}$  NMR spectrum of compound **2e** in DMSO- $d_6$  at 100 MHz.

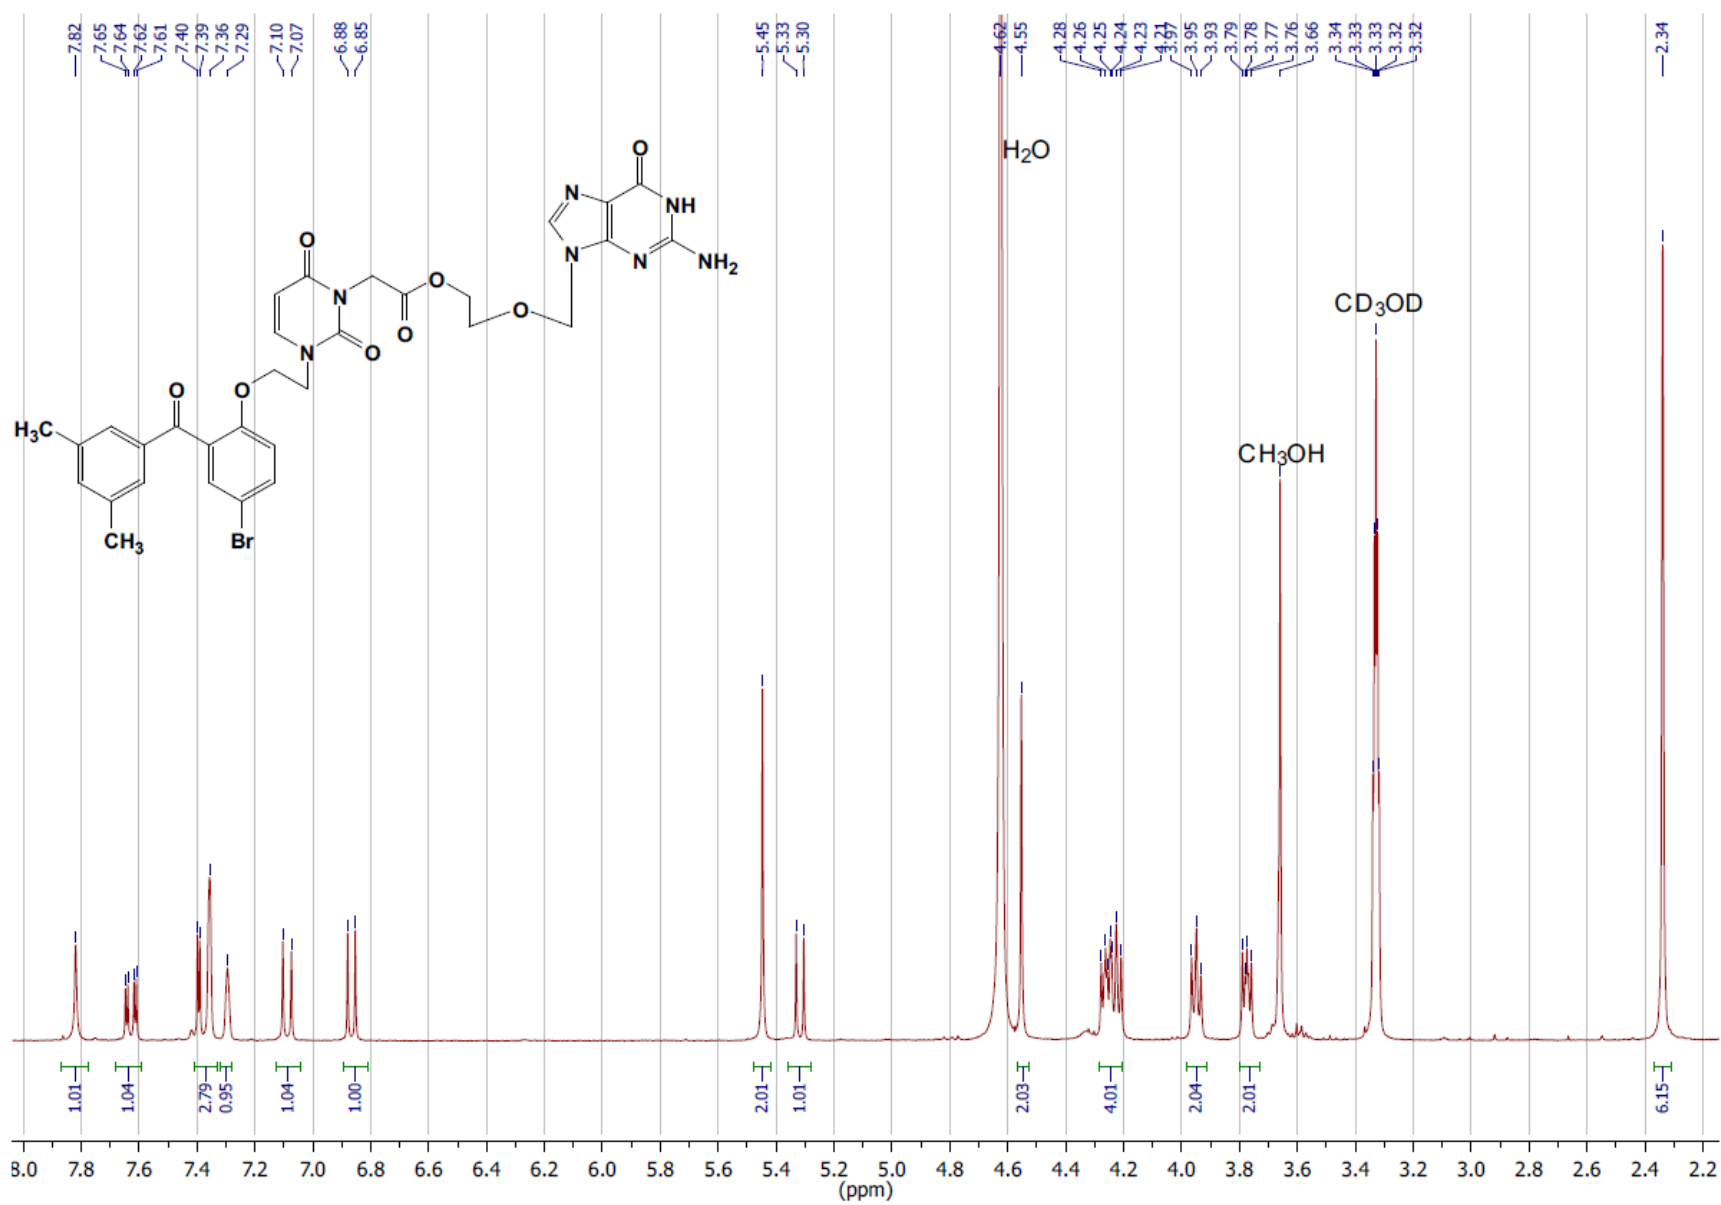

Figure S37. <sup>1</sup>H NMR spectrum of compound **2f** in CD<sub>3</sub>OD at 400 MHz.

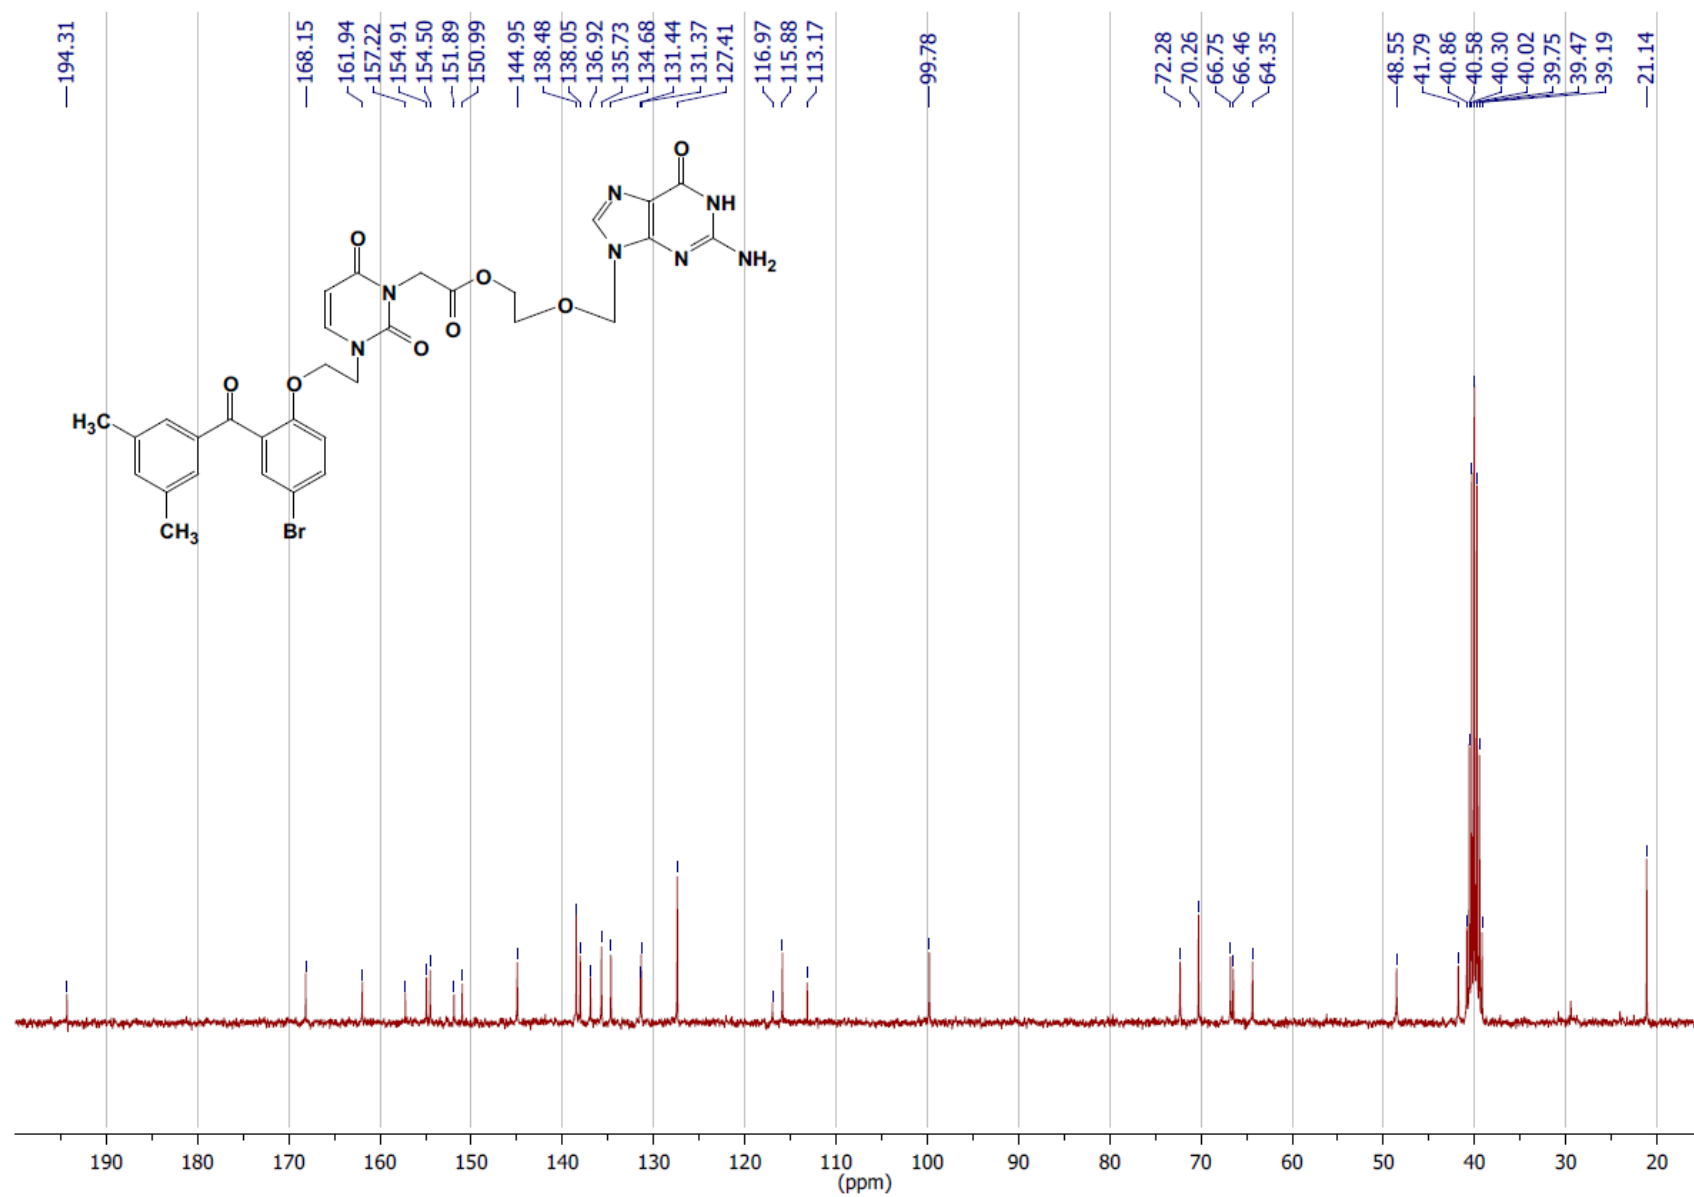

**Figure S38.** <sup>13</sup>C NMR spectrum of compound **2f** in DMSO-d<sub>6</sub> at 100 MHz.



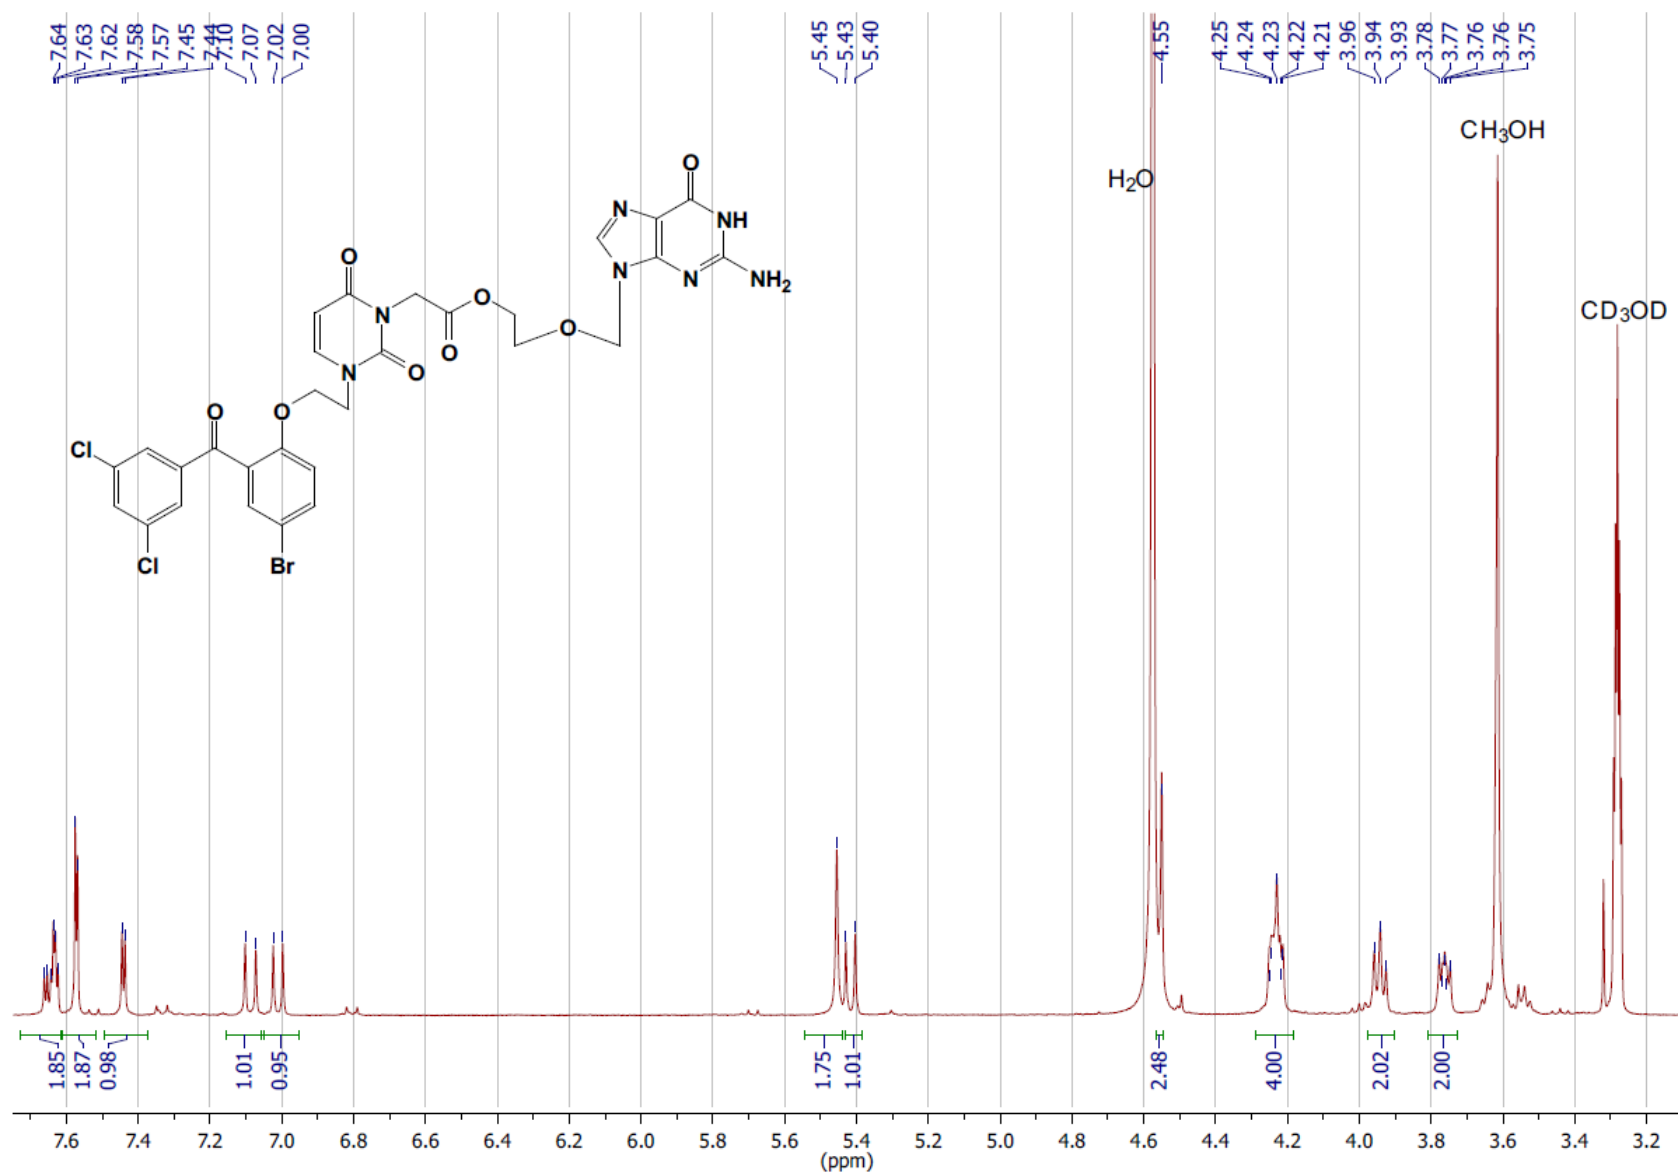

**Figure S39.** <sup>1</sup>H NMR spectrum of compound **2g** in CD<sub>3</sub>OD at 400 MHz.

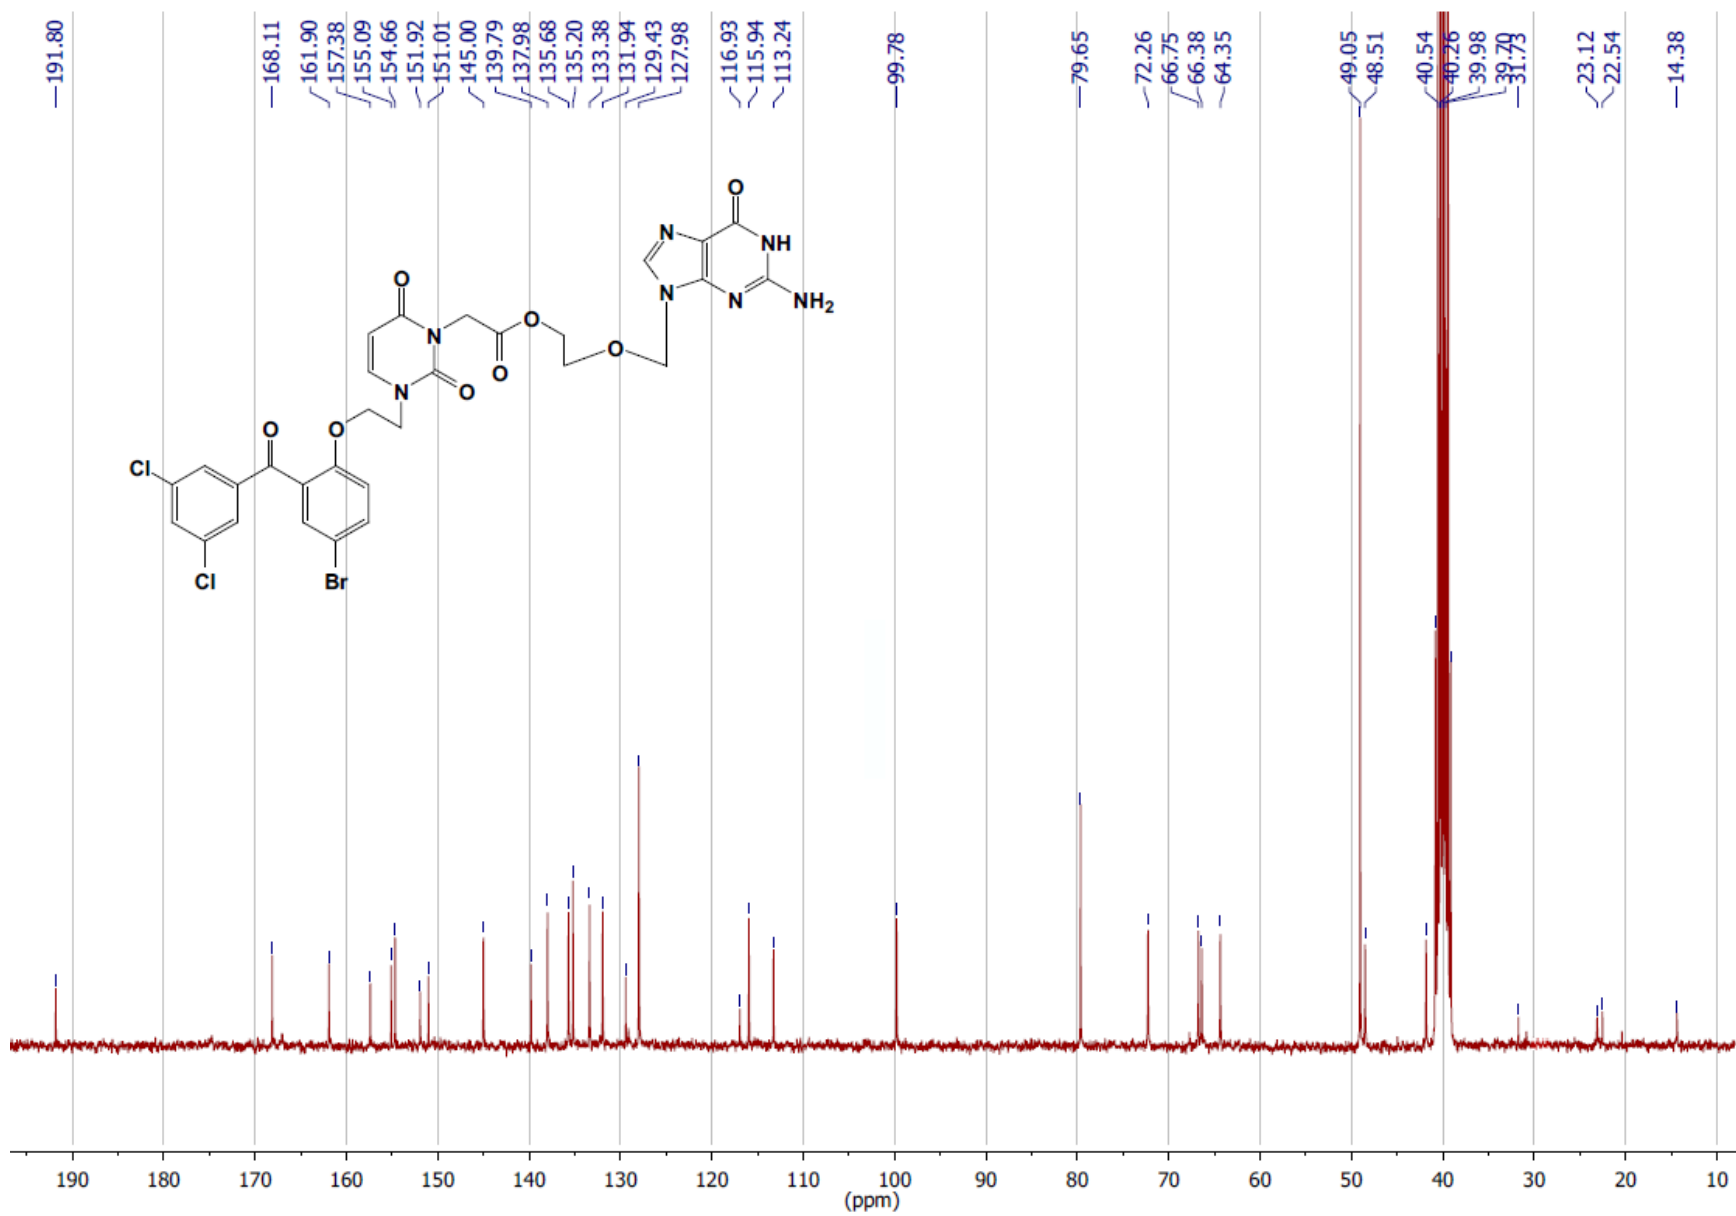

Figure S40. <sup>13</sup>C NMR spectrum of compound 2g in DMSO-d<sub>6</sub> at 100 MHz.

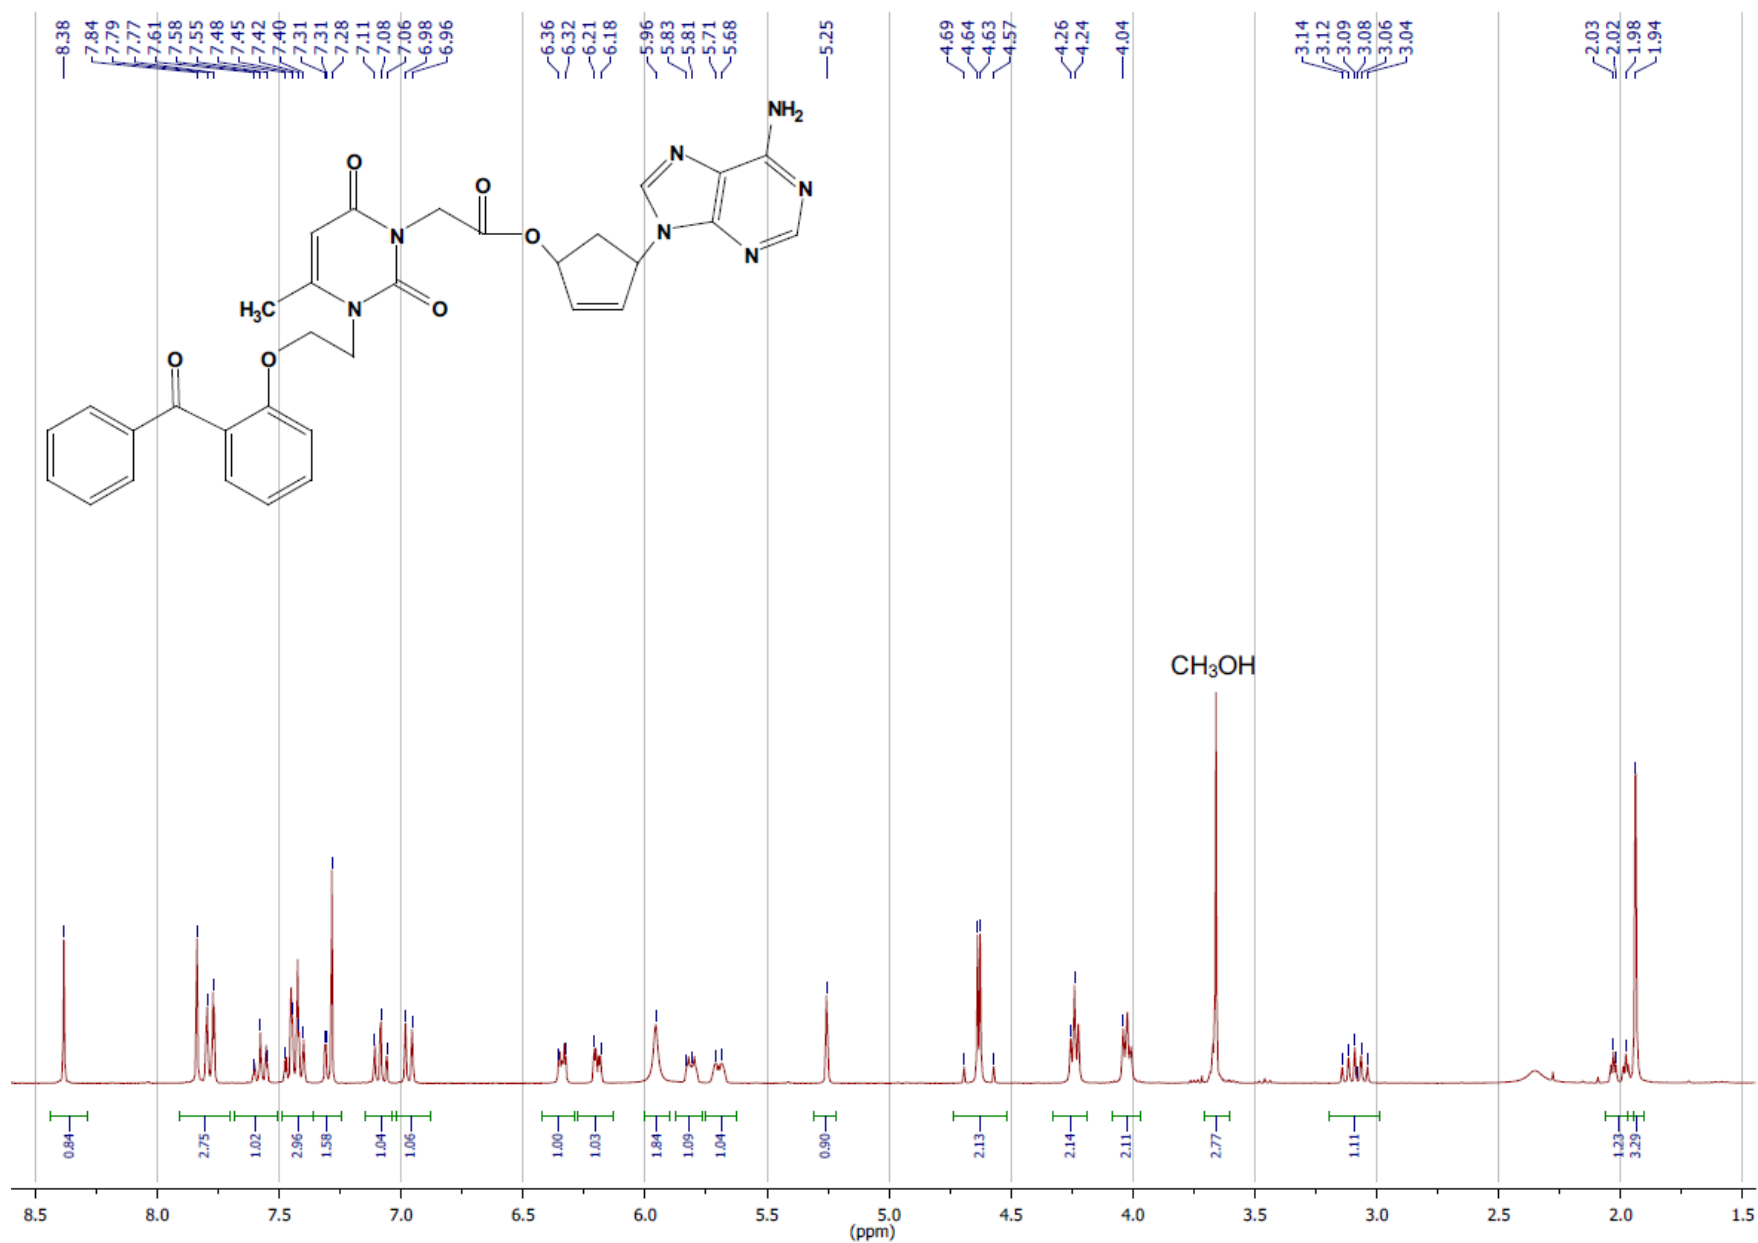

**Figure S41.** <sup>1</sup>H NMR spectrum of compound **6a** (in CDCl<sub>3</sub> at 400 MHz)

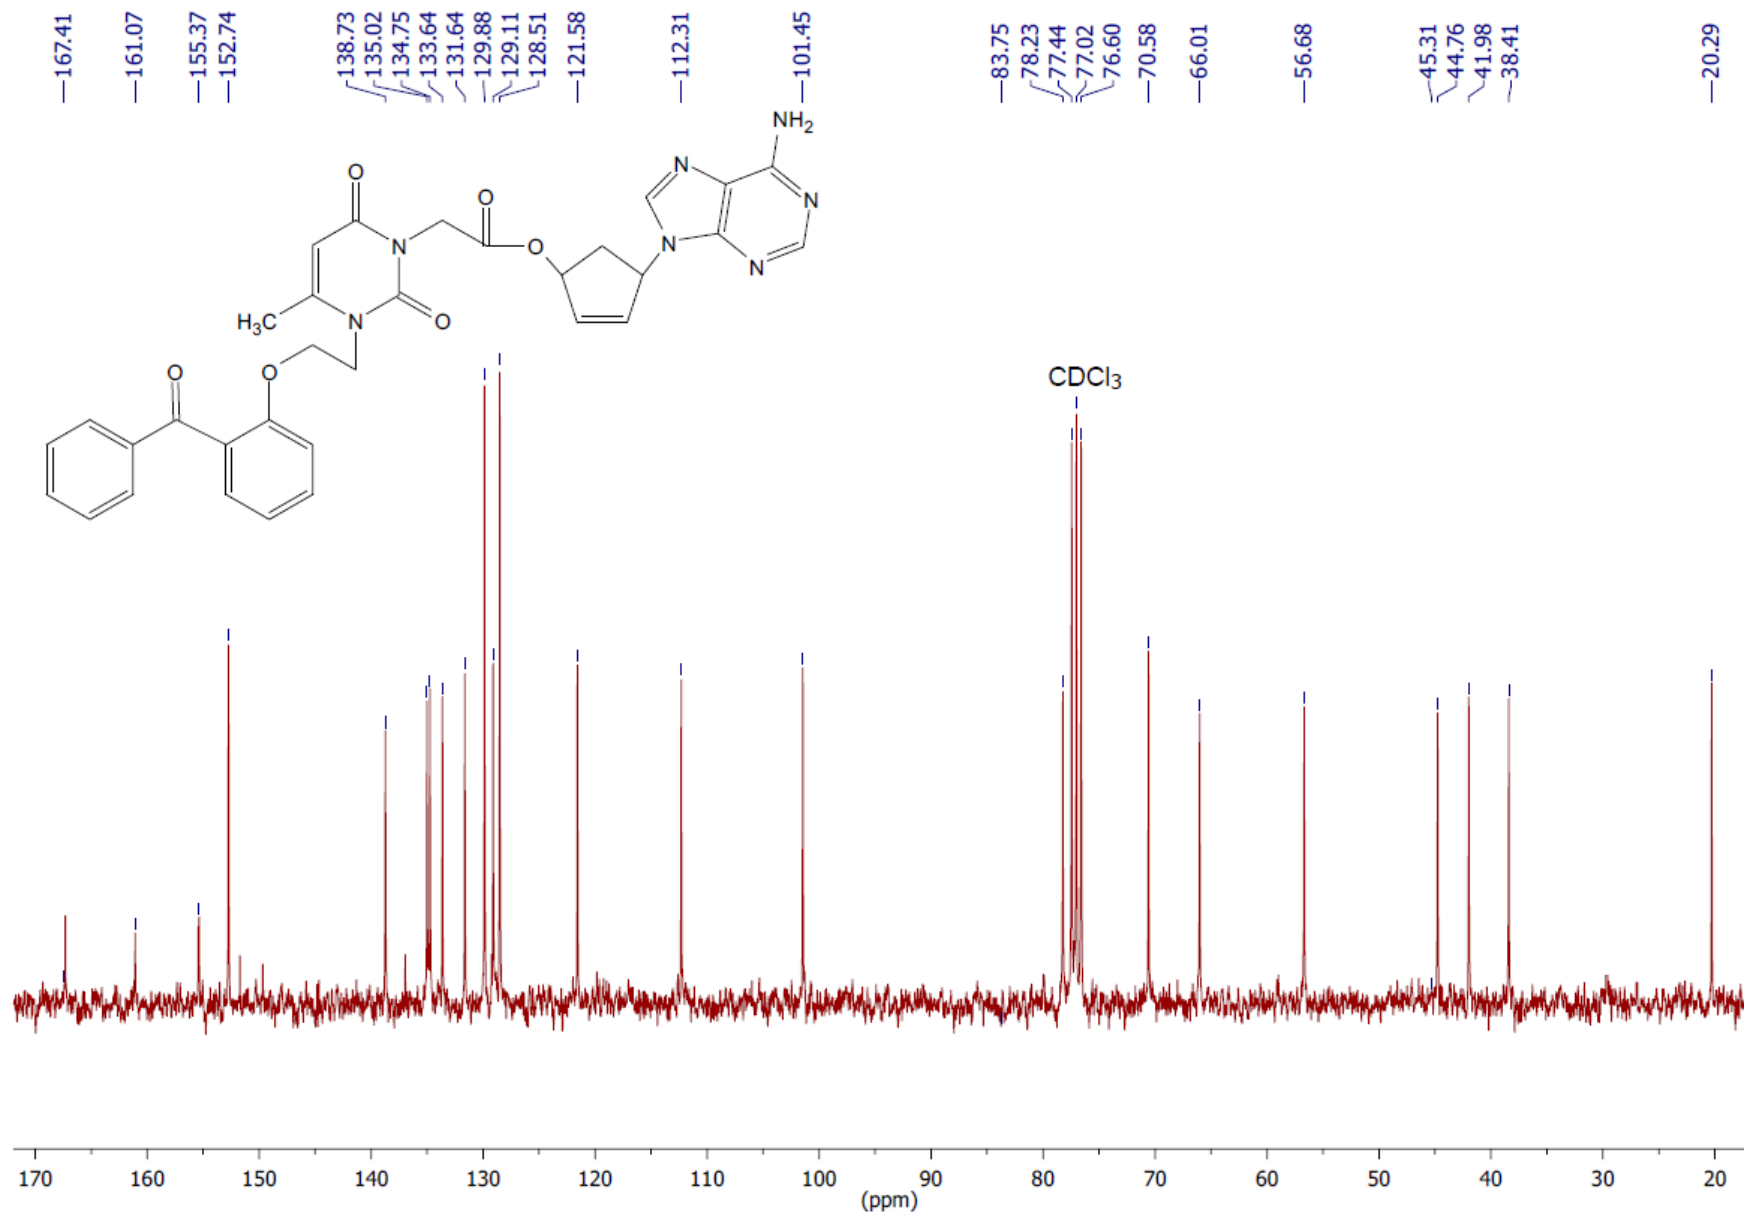

**Figure S42.** <sup>13</sup>C NMR spectrum of compound **6a** (in CDCl<sub>3</sub> at 100 MHz)

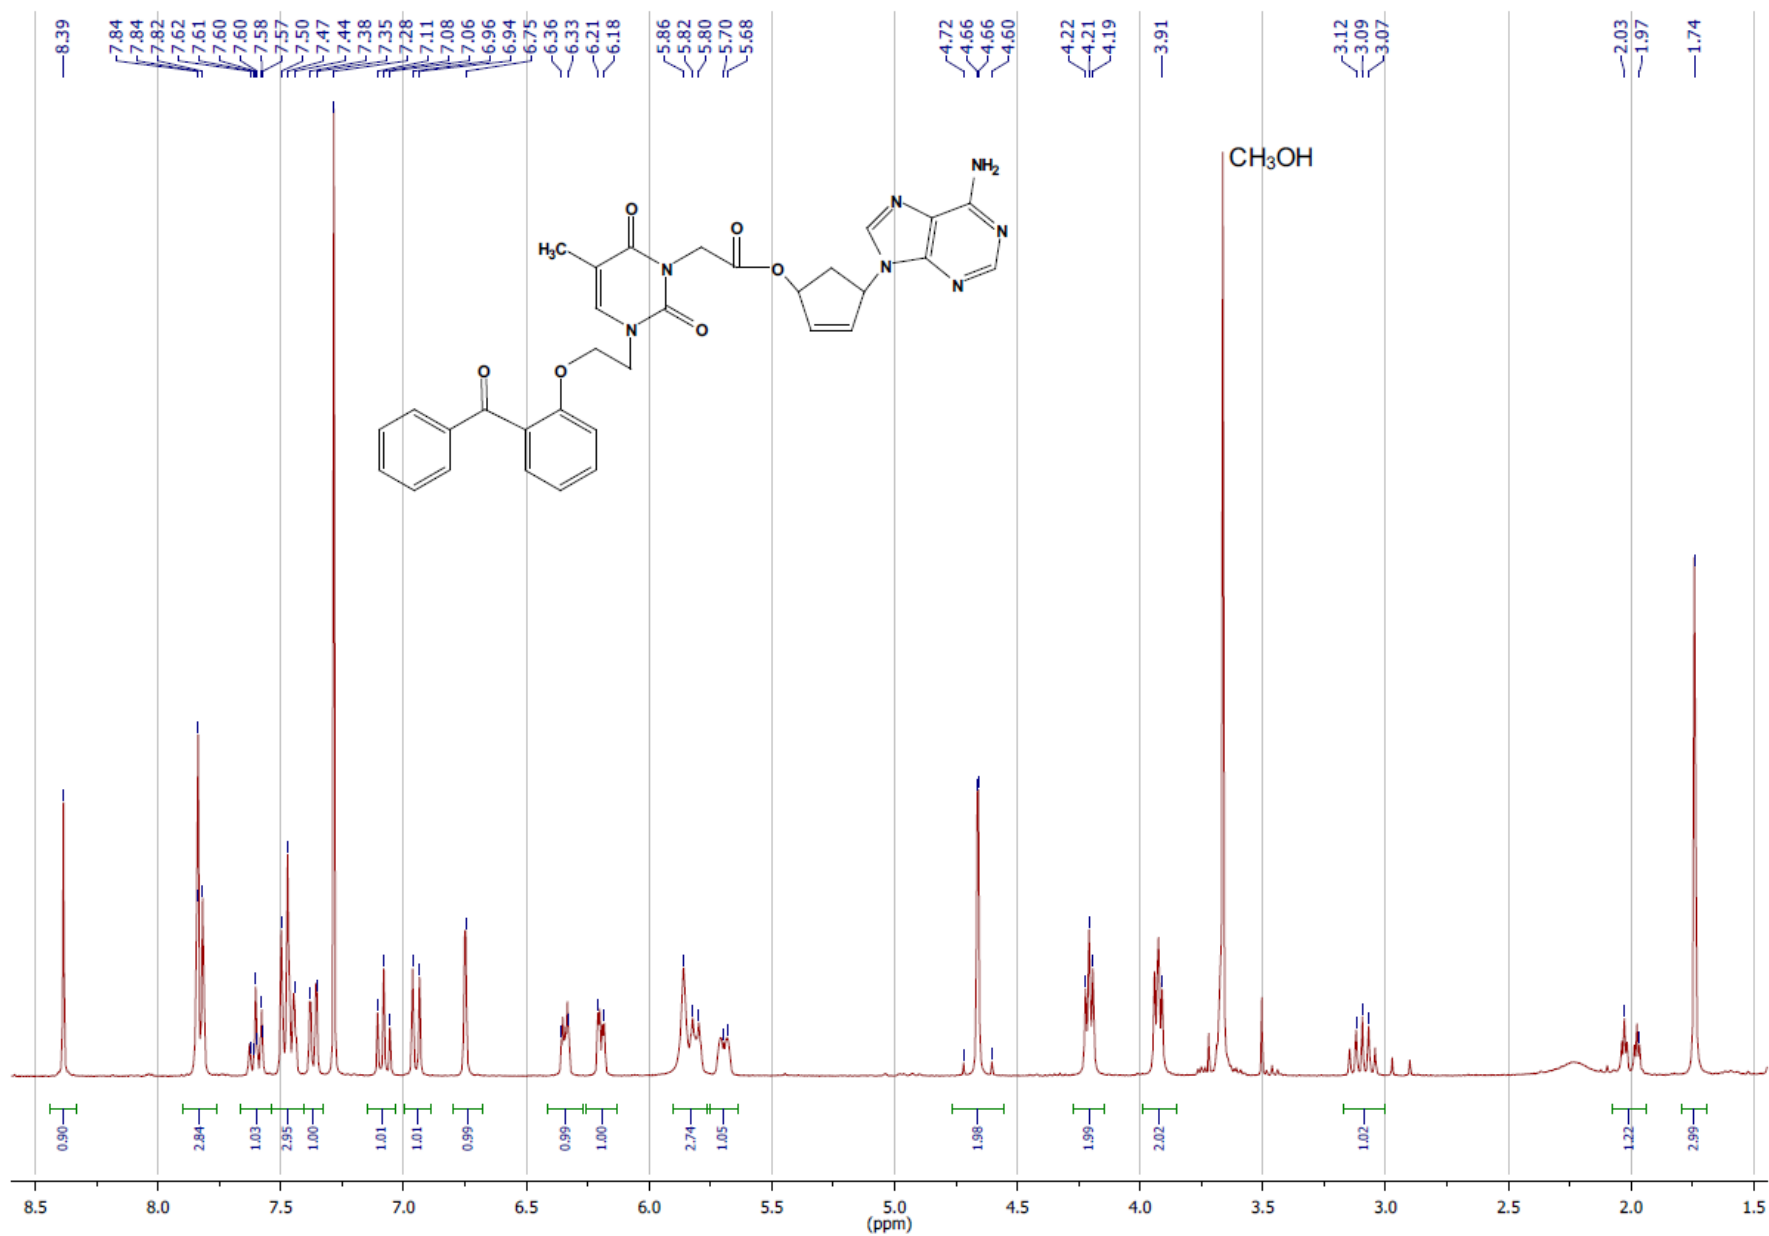

Figure S43. <sup>1</sup>H NMR spectrum of compound **6b** (in CDCl<sub>3</sub> at 400 MHz)

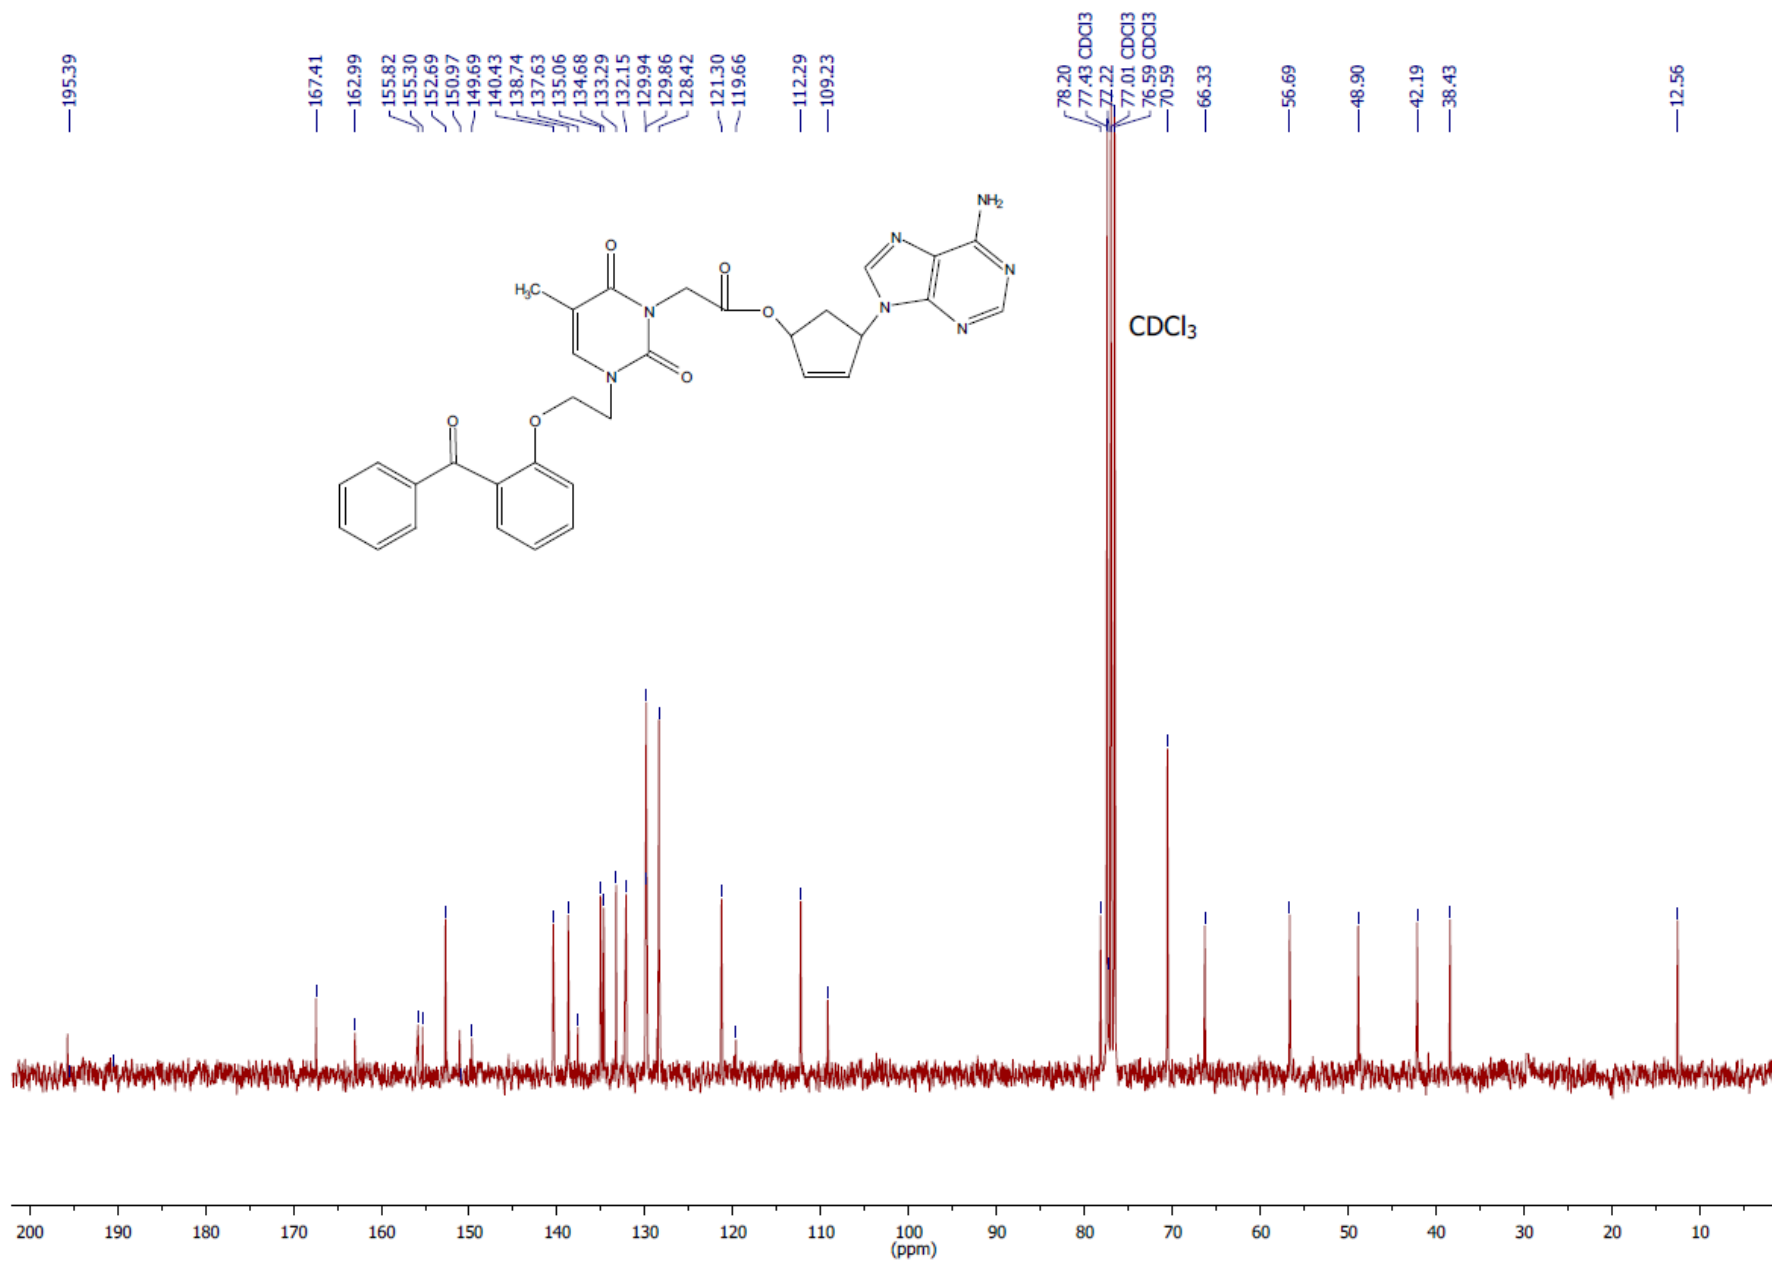

**Figure S44.** <sup>13</sup>C NMR spectrum of compound **6b** (in CDCl<sub>3</sub> at 100 MHz)

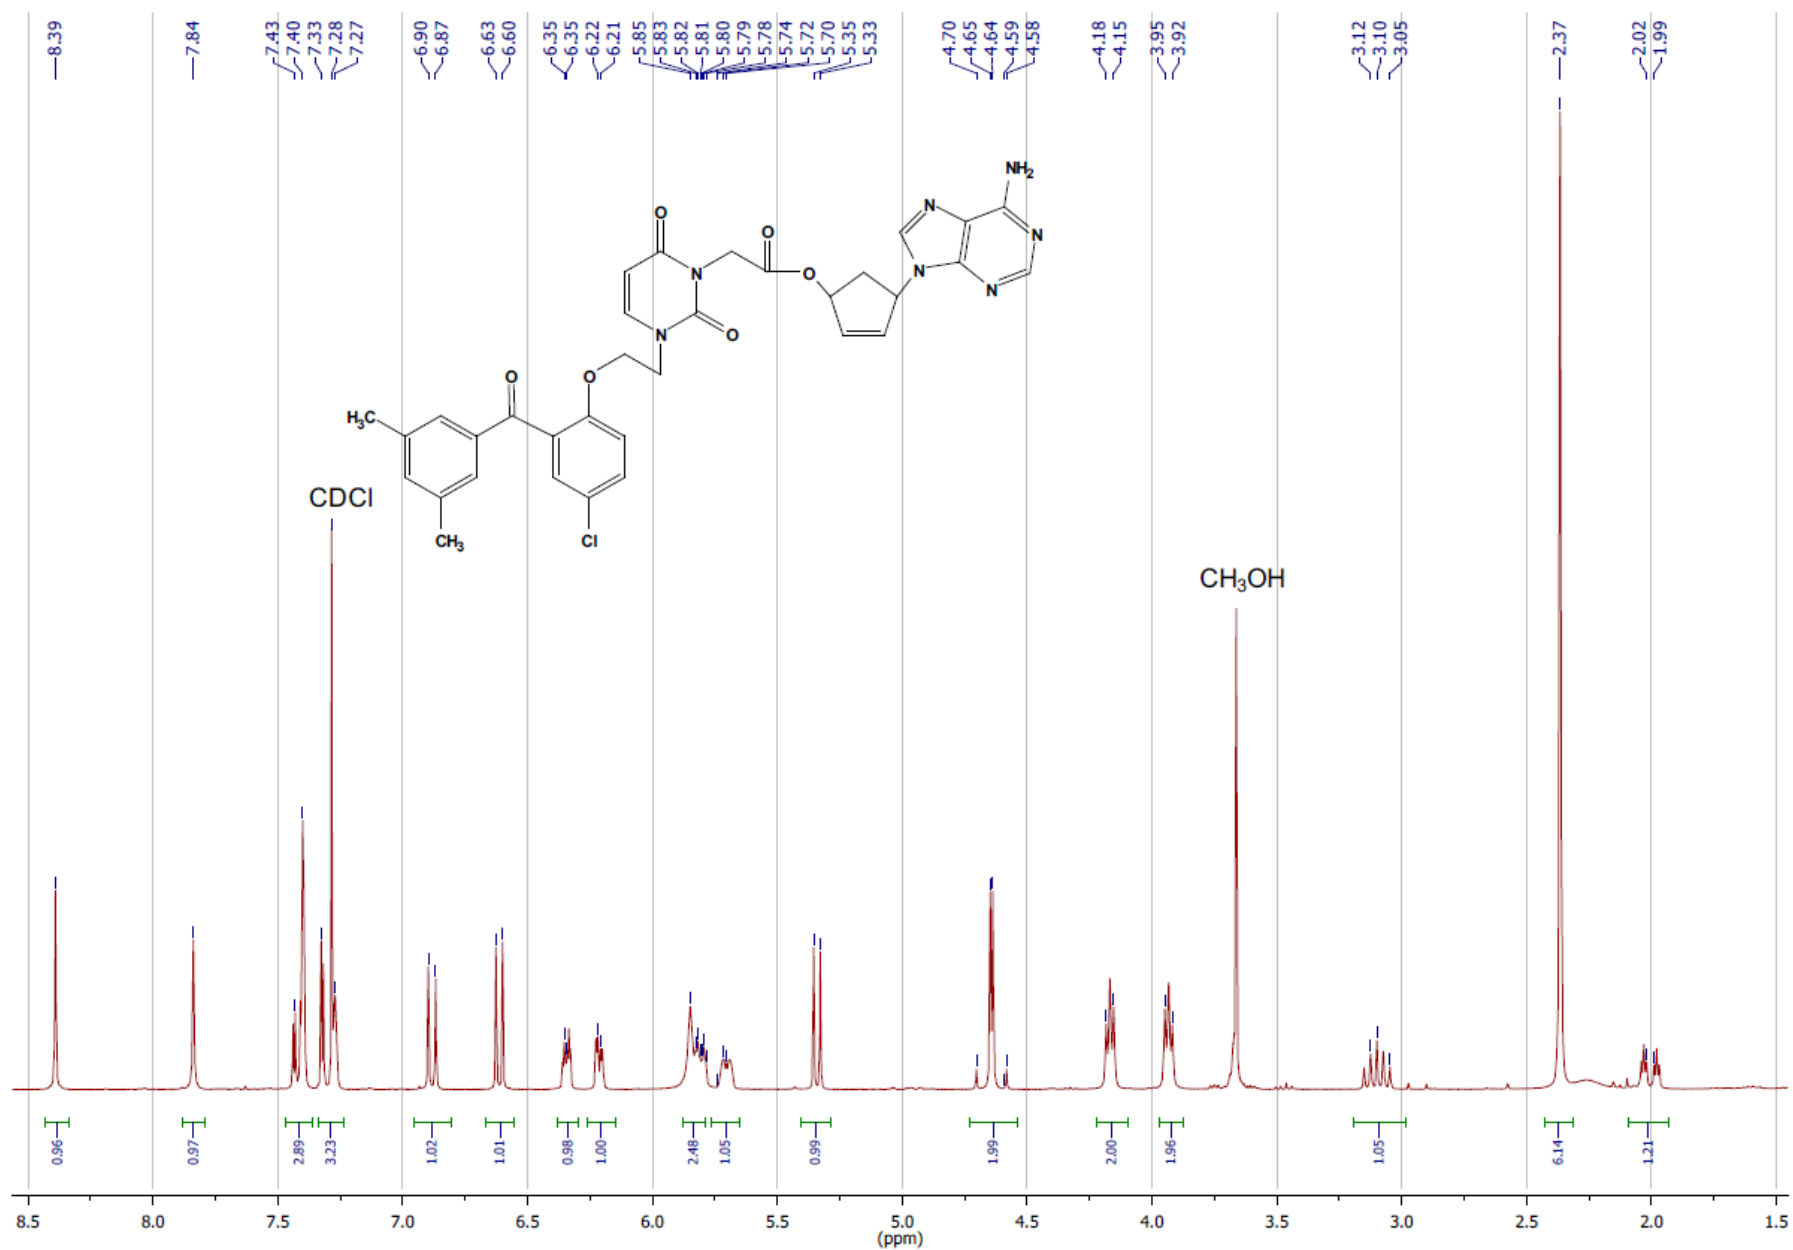

Figure S45.  $^1\text{H}$  NMR spectrum of compound **6c** (in  $\text{CDCl}_3$  at 400 MHz)

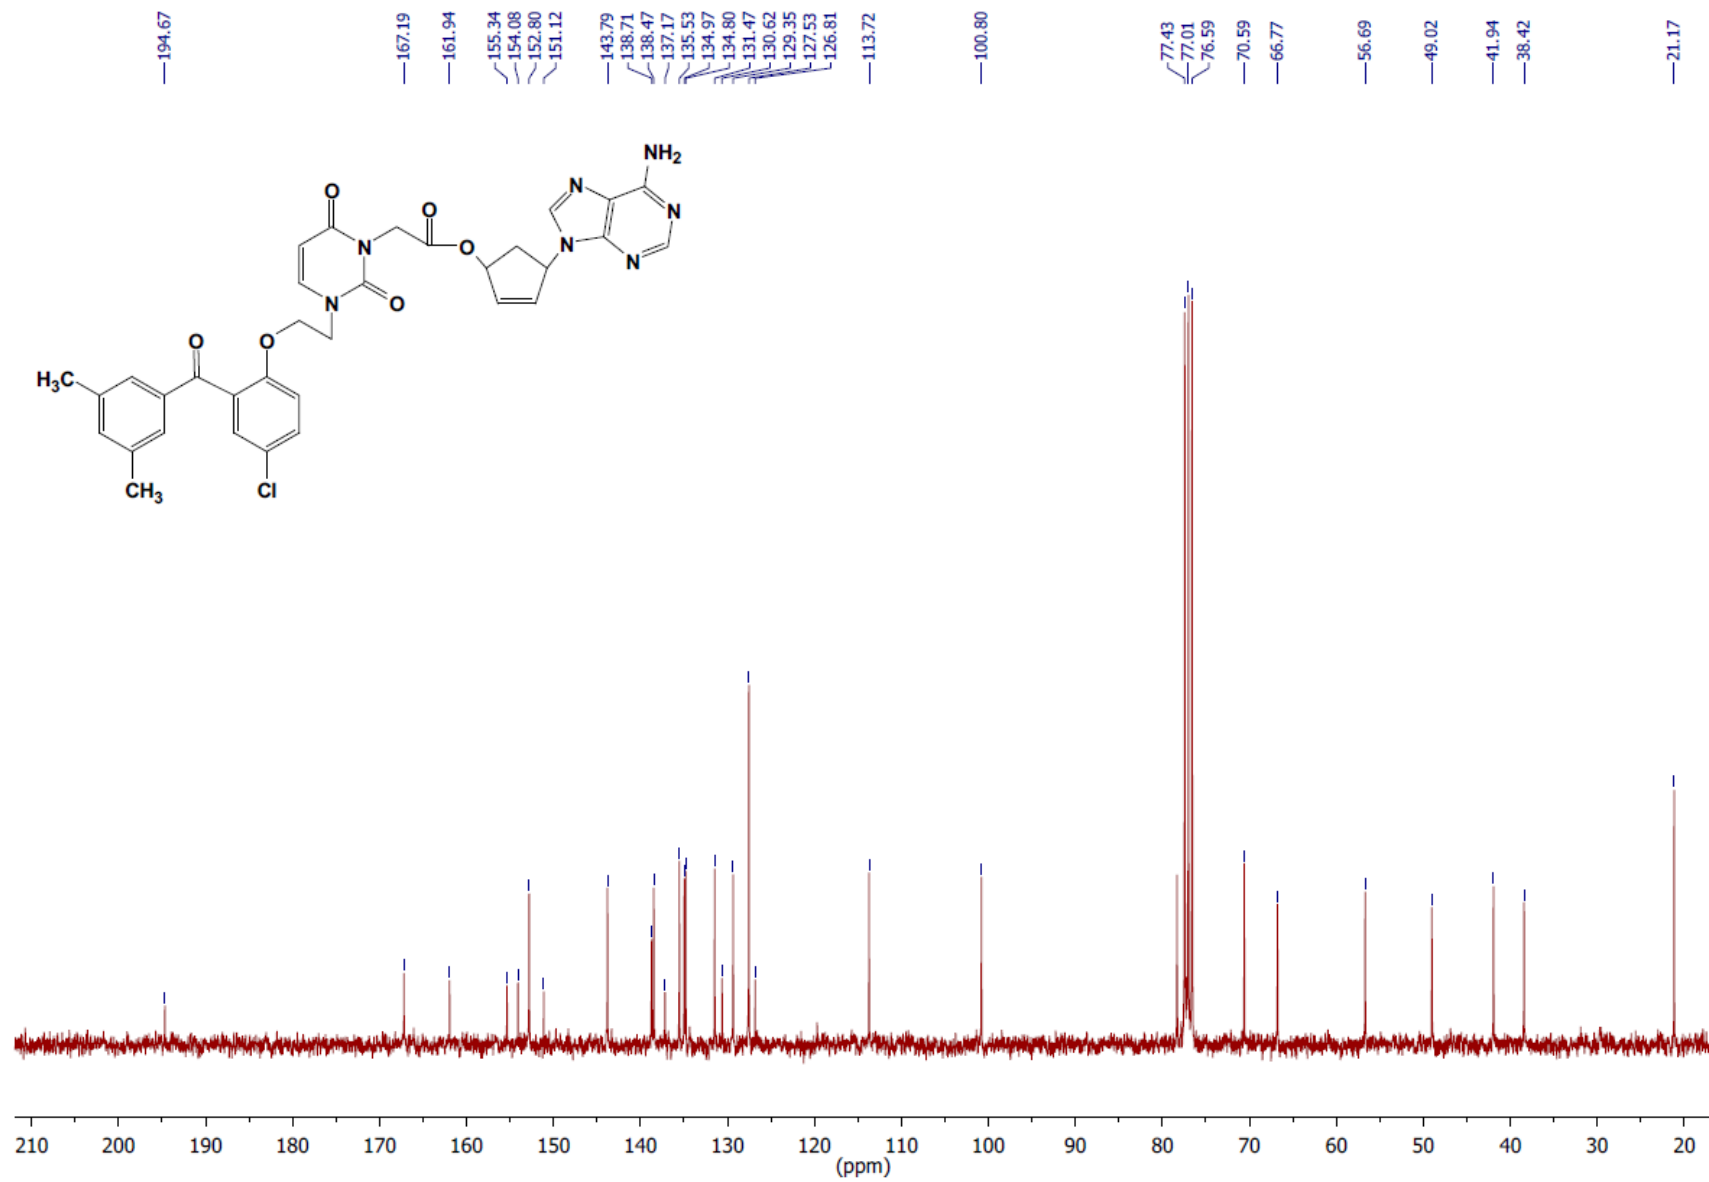

**Figure S46.** <sup>13</sup>C NMR spectrum of compound **6c** (in CDCl<sub>3</sub> at 100 MHz)



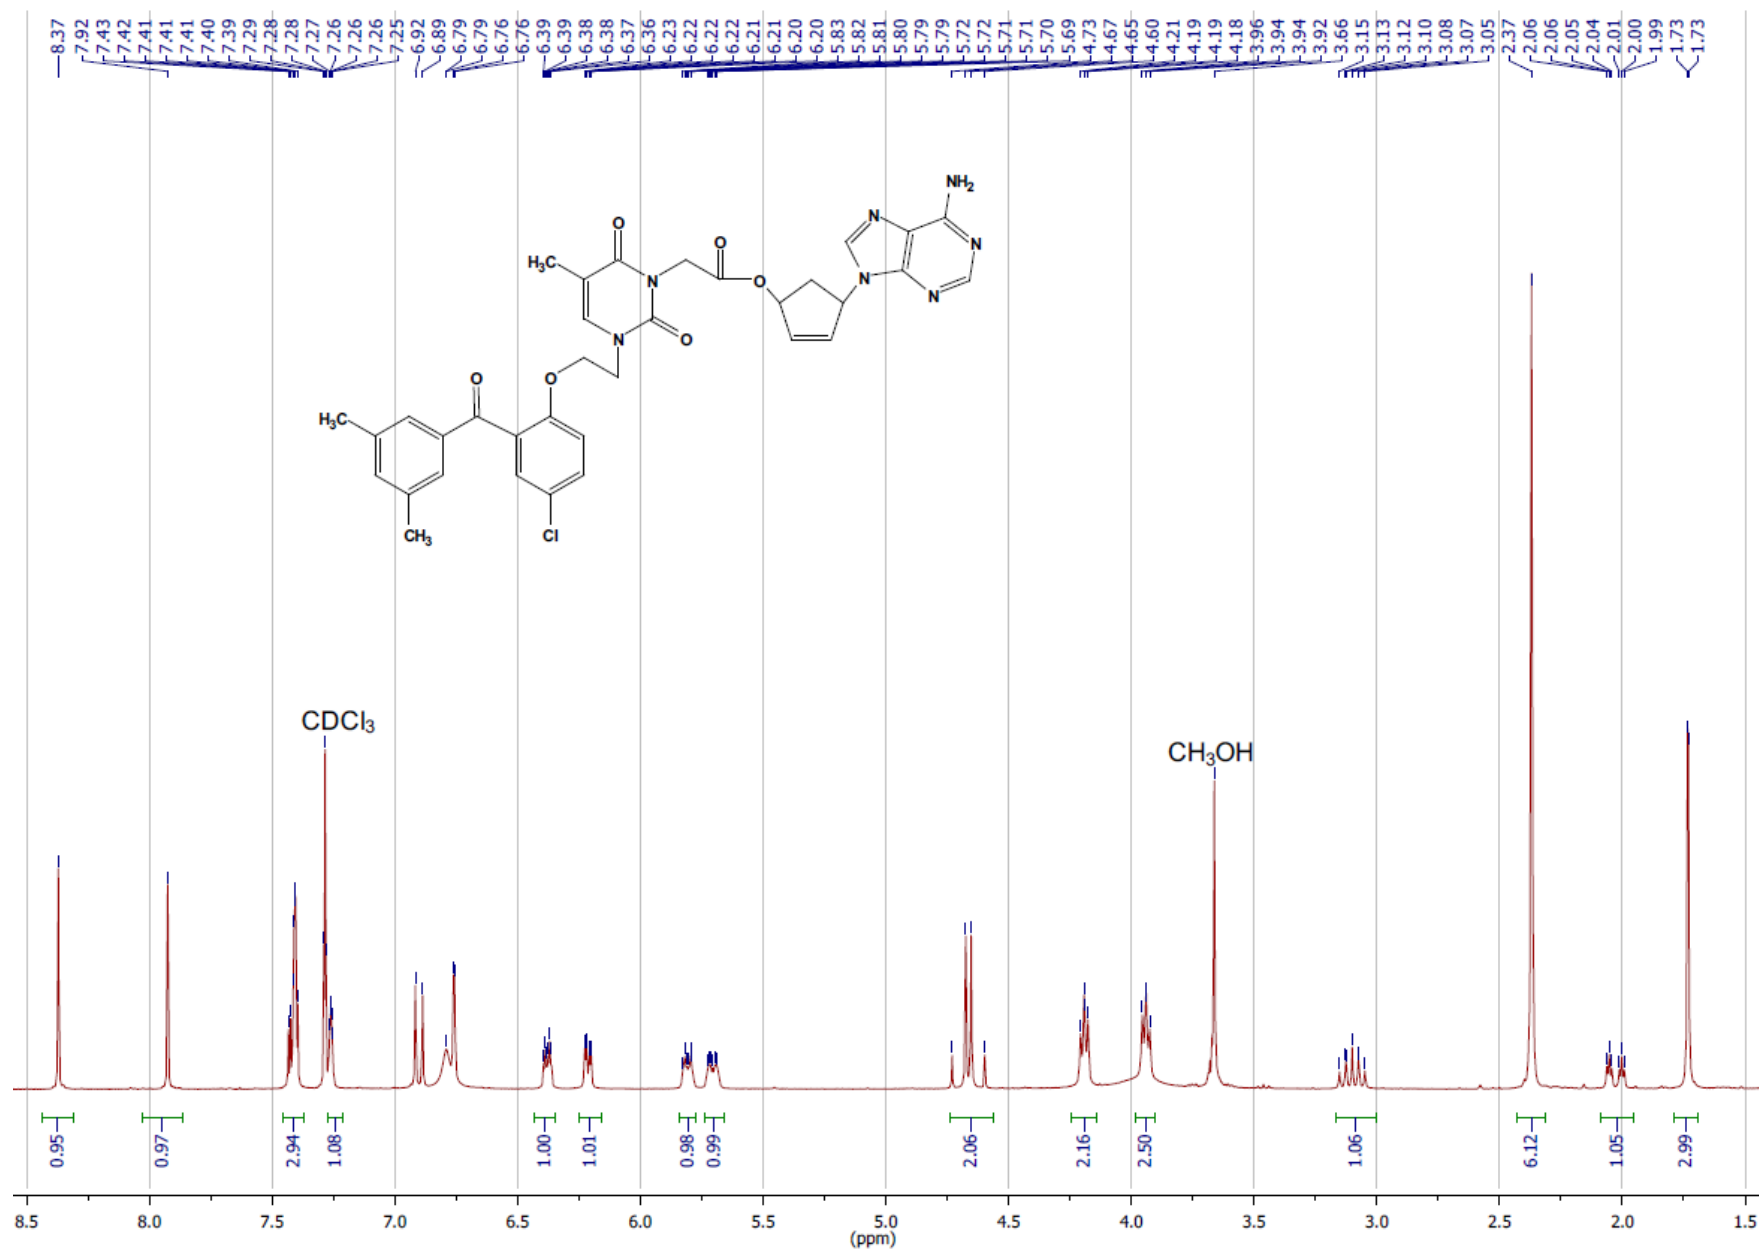

Figure S47. <sup>1</sup>H NMR spectrum of compound **6d** (in CDCl<sub>3</sub> at 400 MHz)

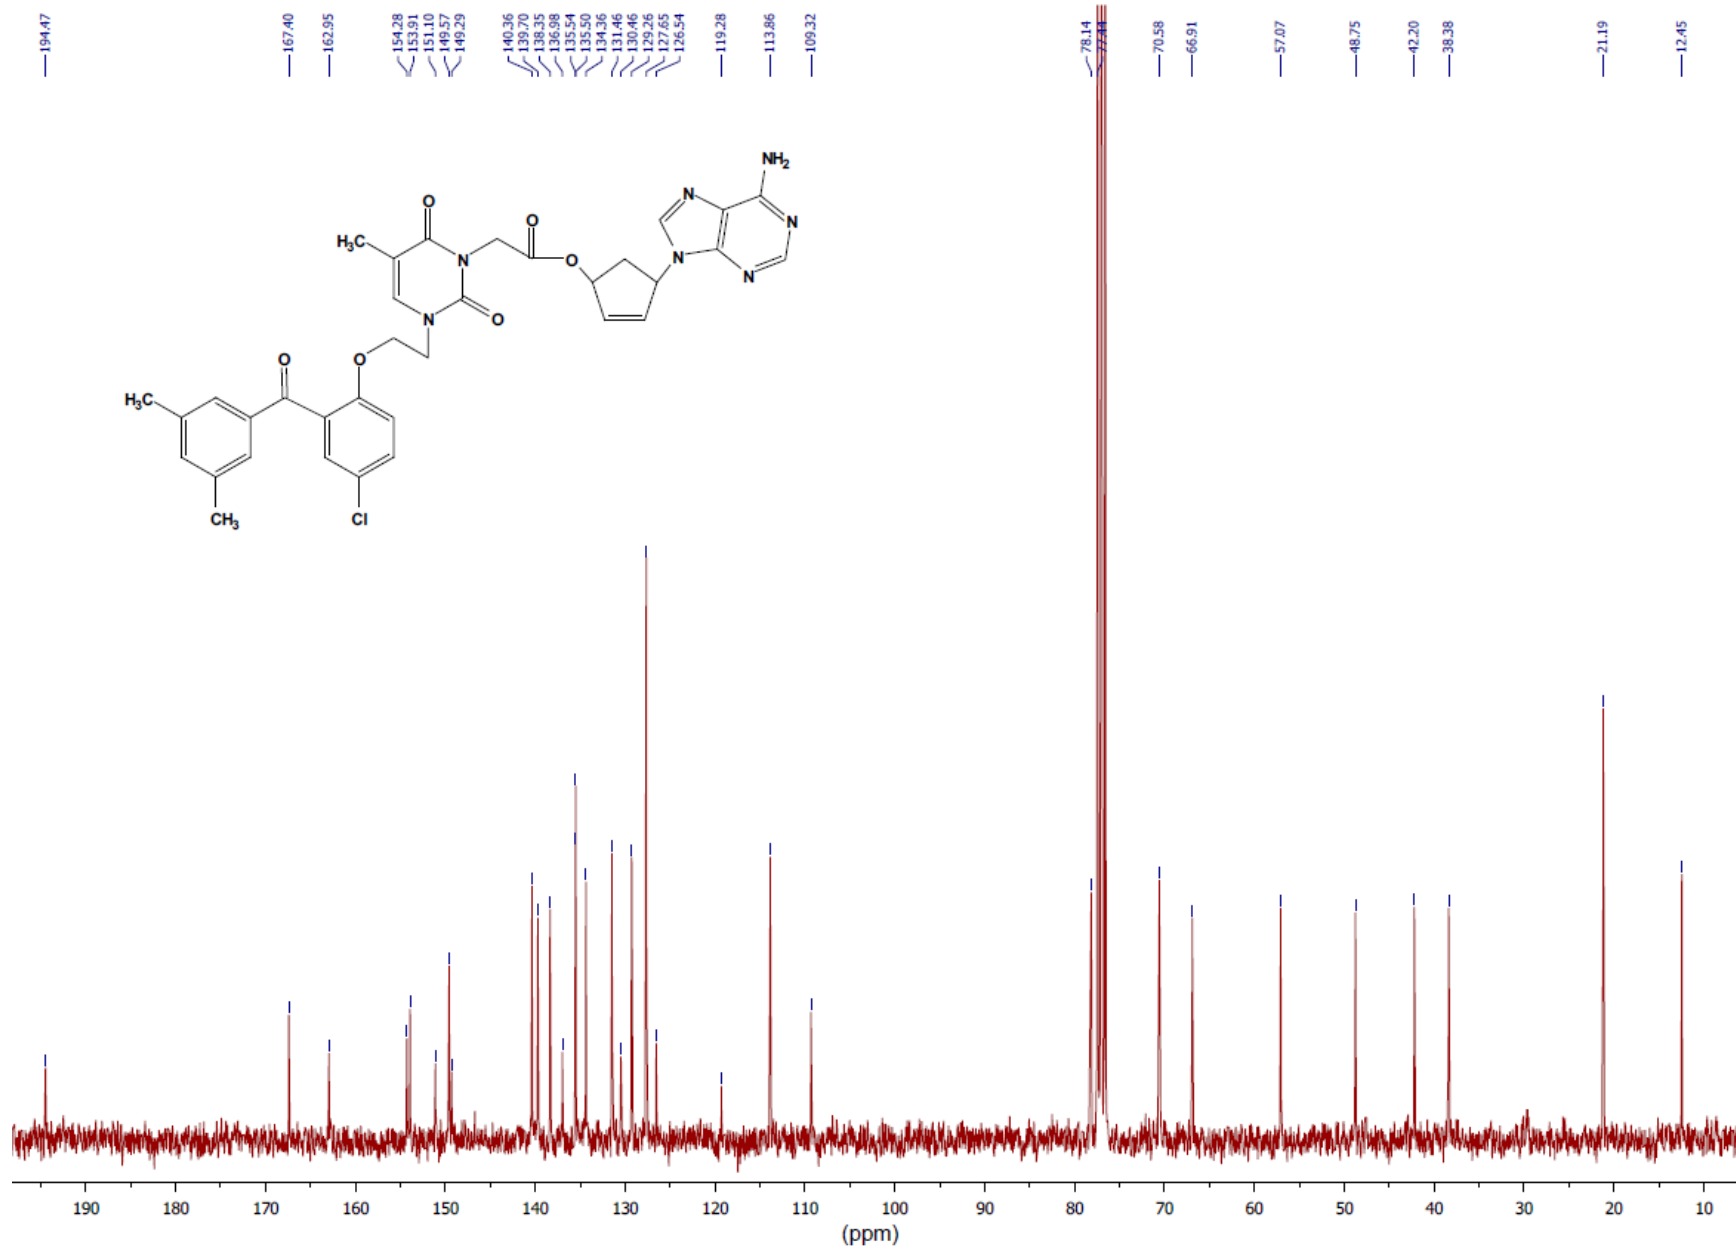

**Figure S48.** <sup>13</sup>C NMR spectrum of compound **6d** (in CDCl<sub>3</sub> at 100 MHz)

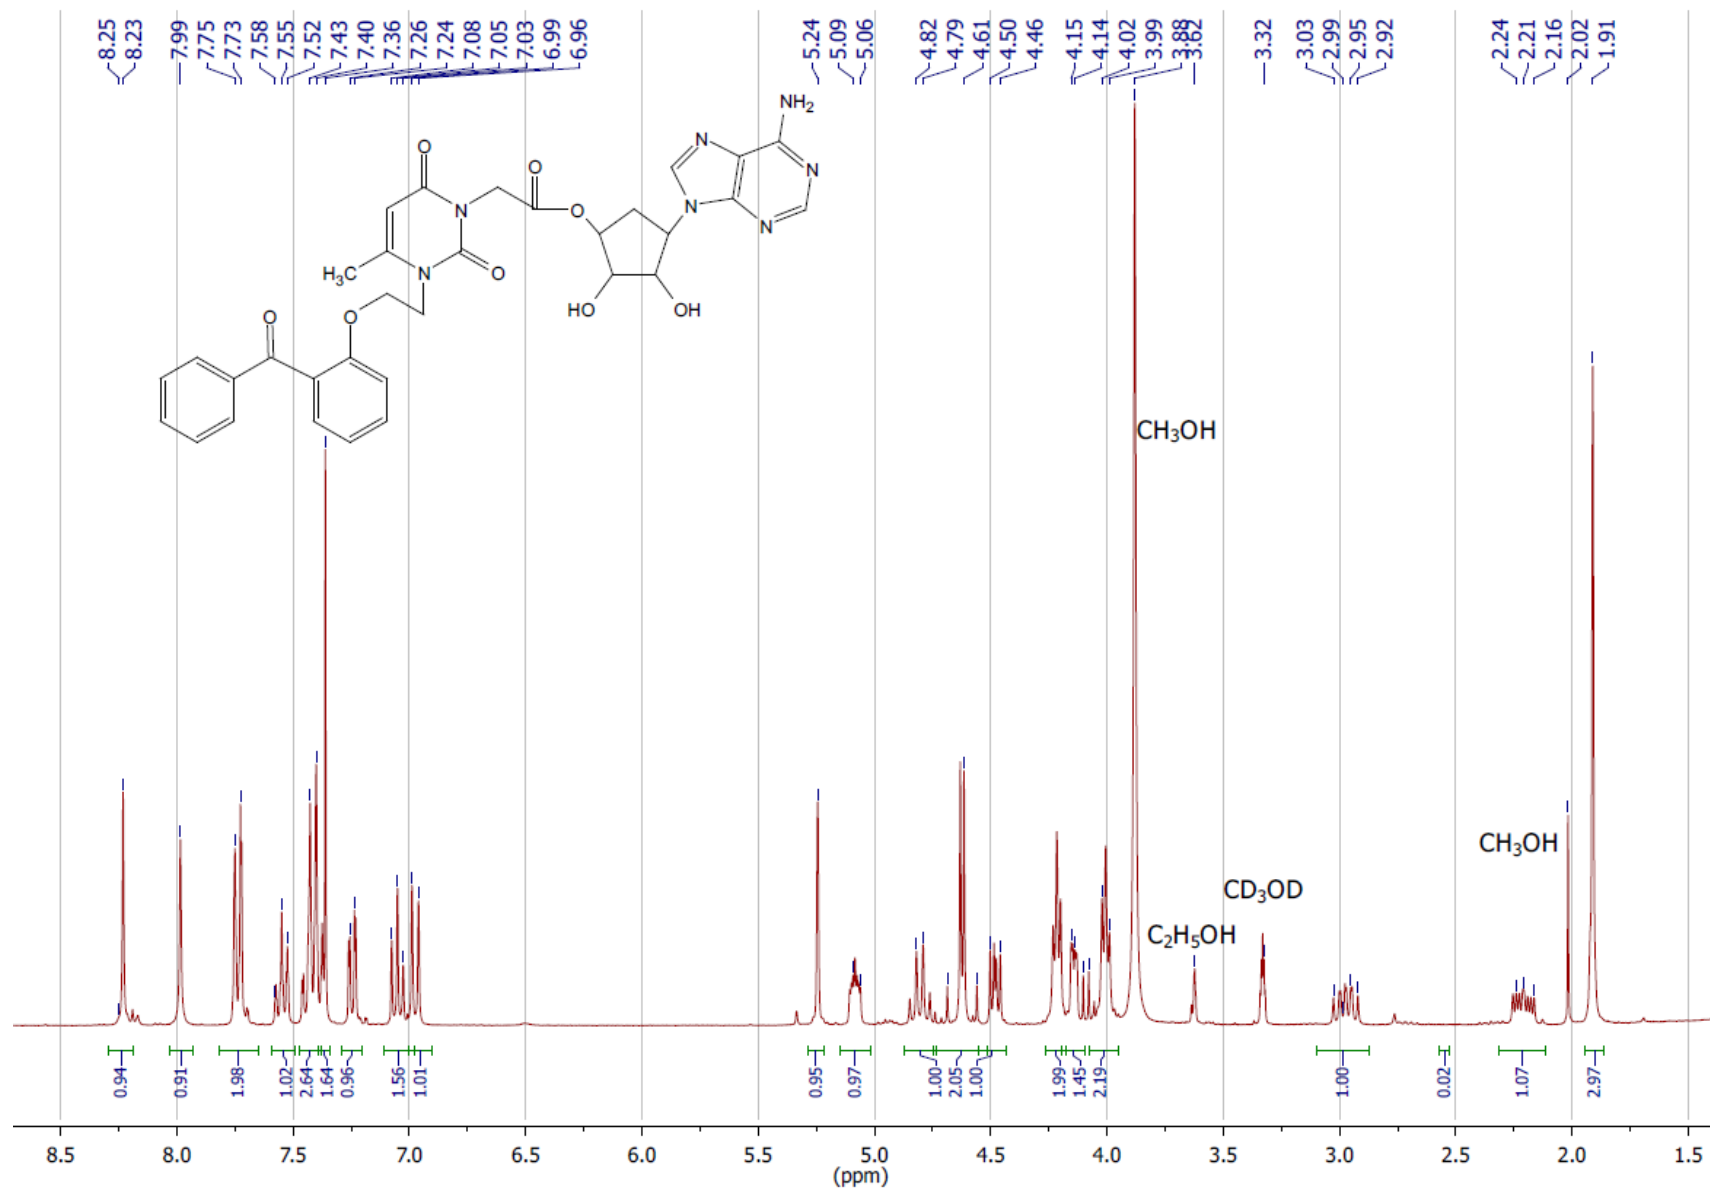

Figure S49. <sup>1</sup>H NMR spectrum of compound 3a (in CDCl<sub>3</sub>: CD<sub>3</sub>OD at 400 MHz)

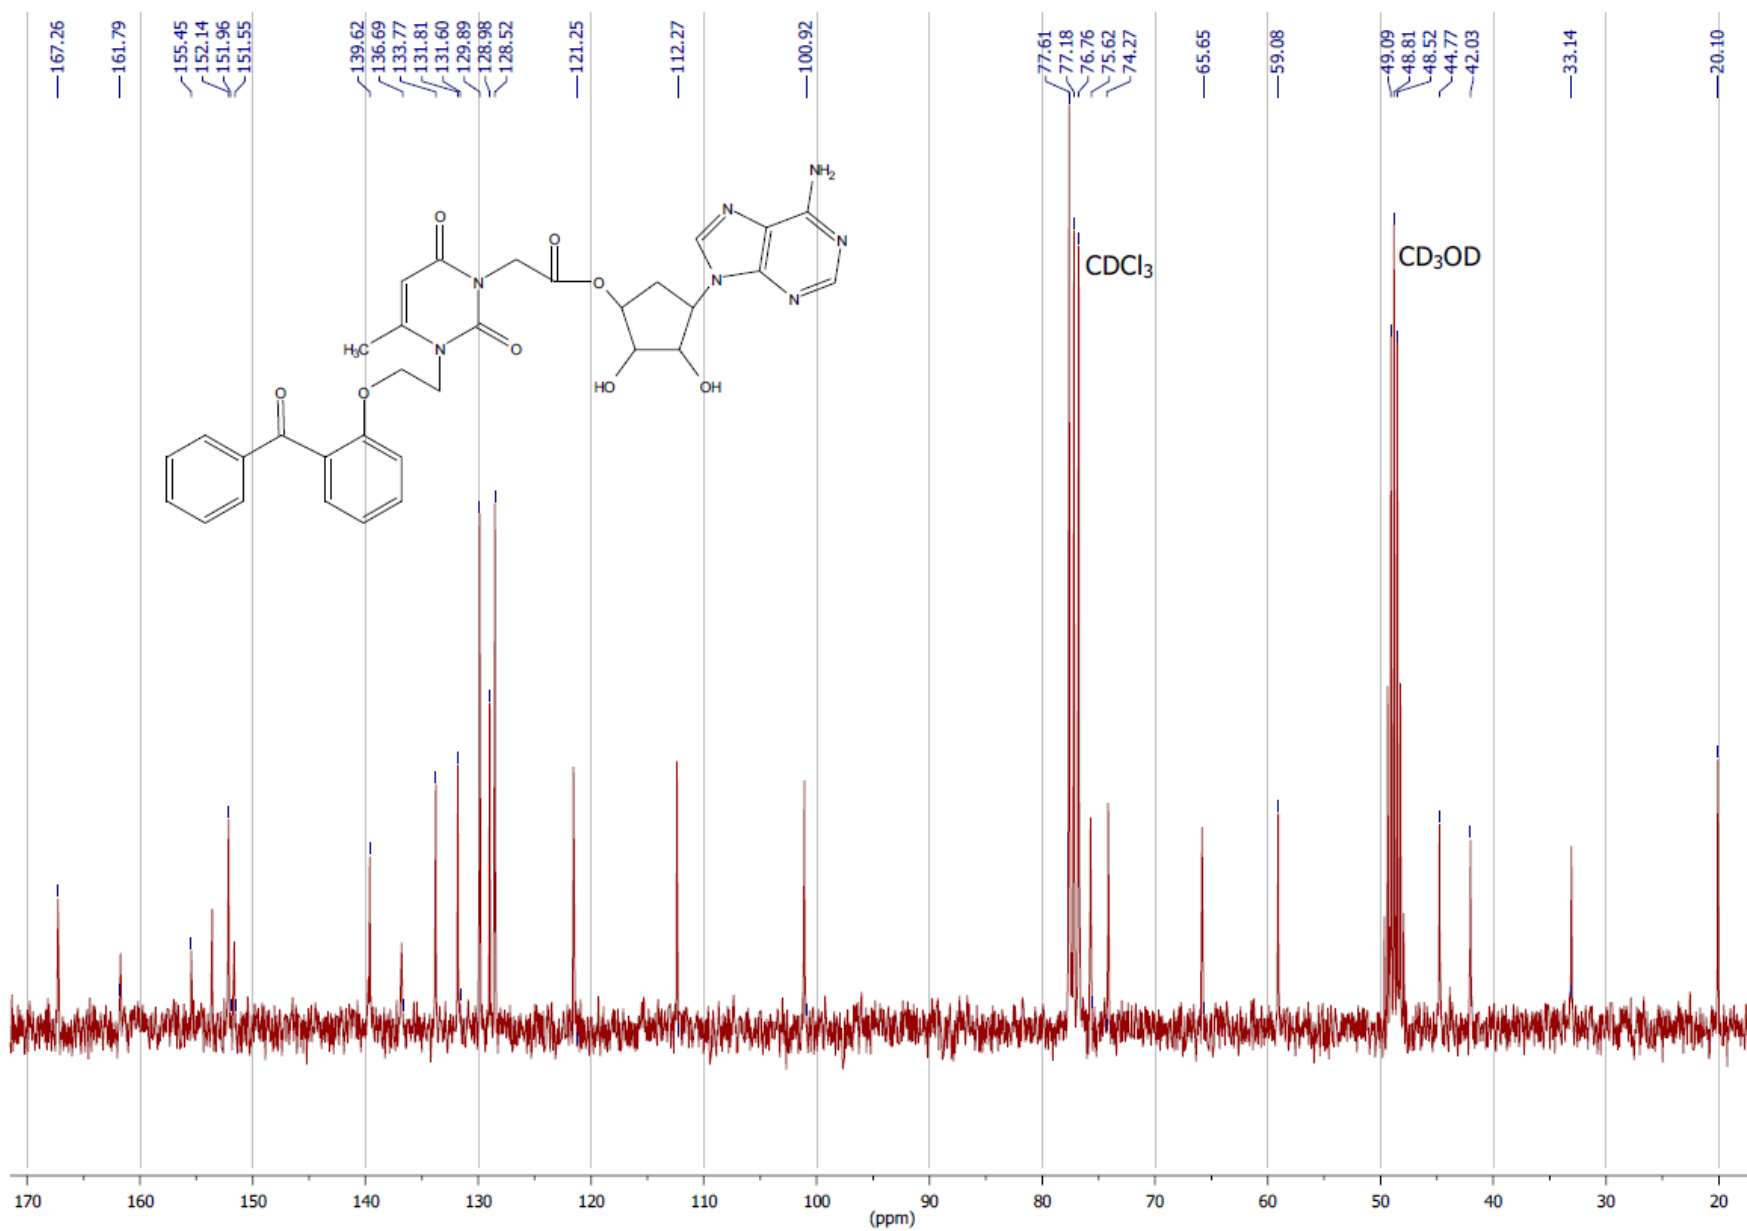

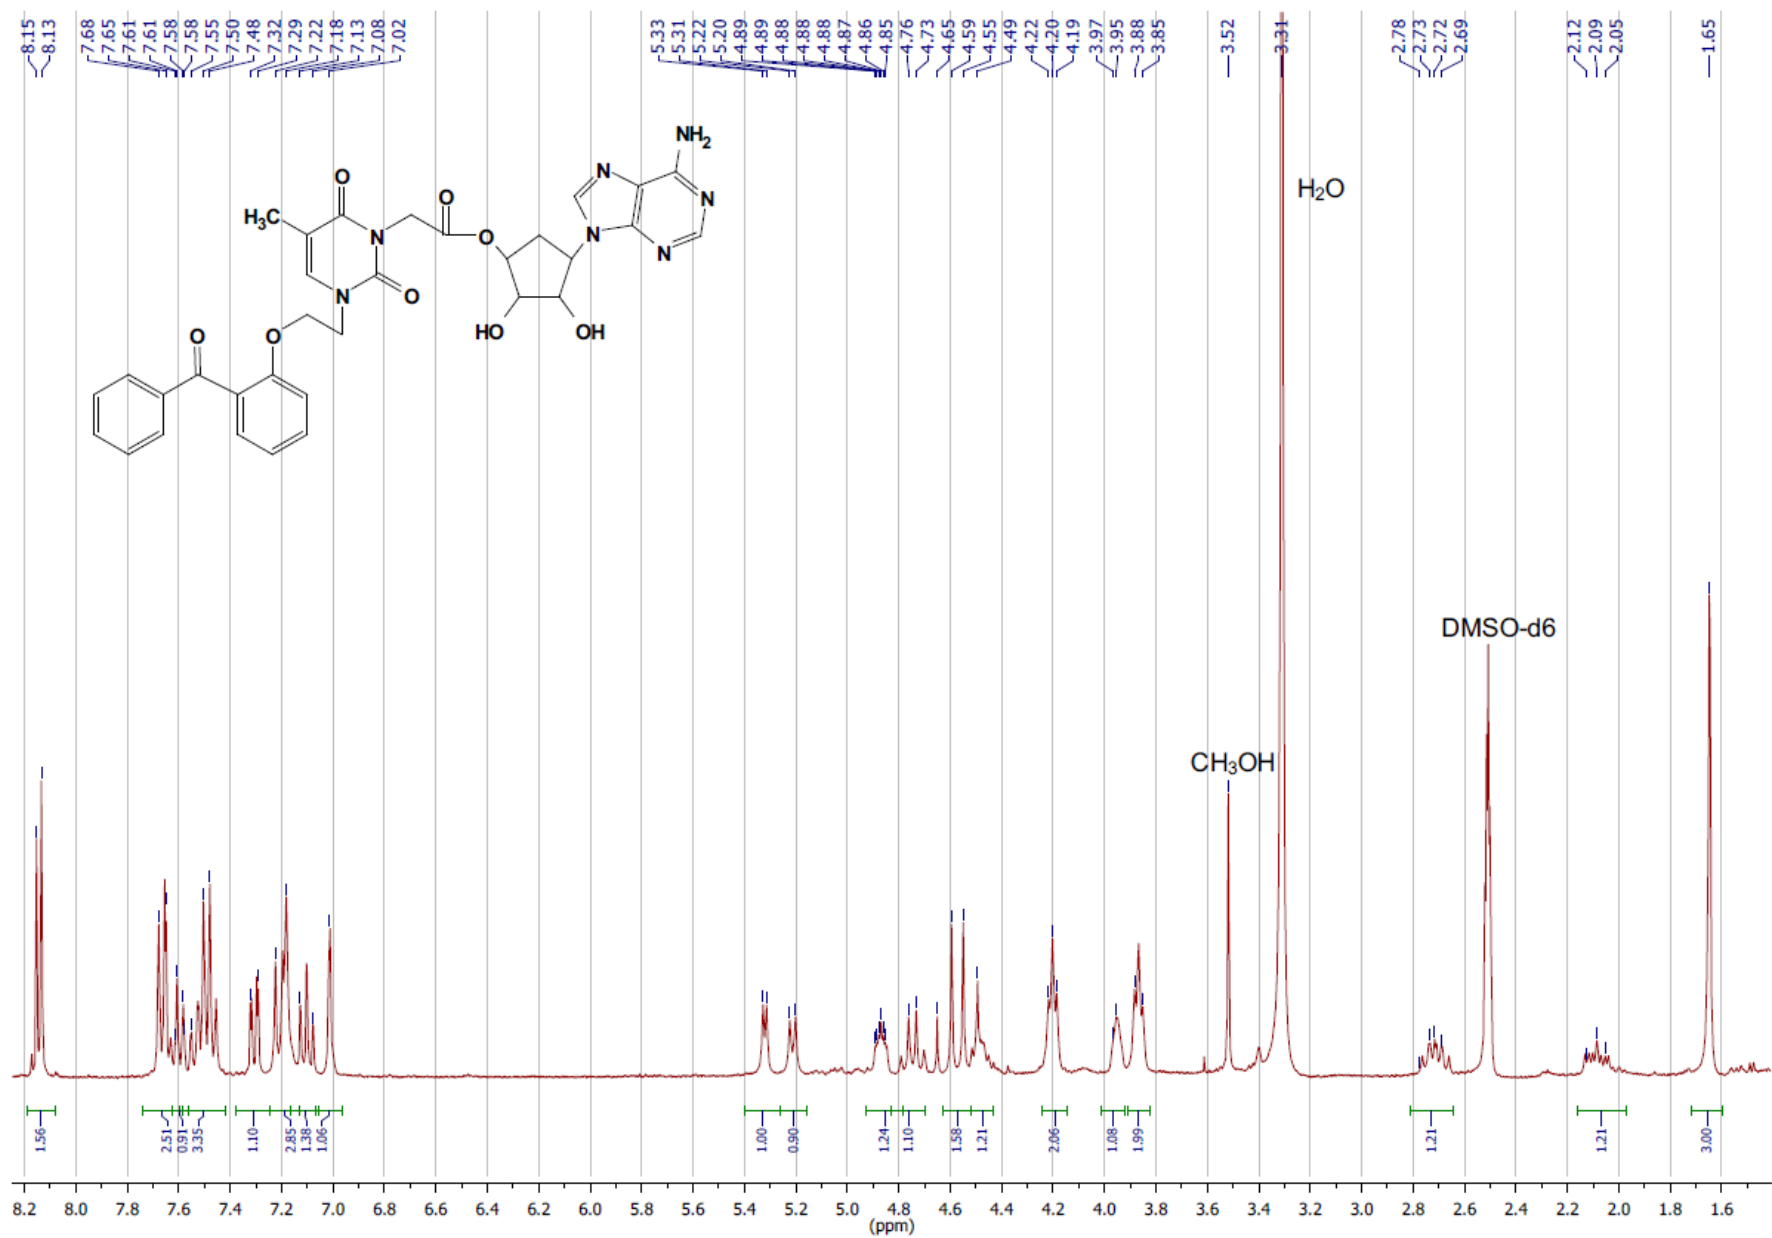

Figure S51. <sup>1</sup>H NMR spectrum of compound **3b** (in DMSO-*d*<sub>6</sub> at 400 MHz)

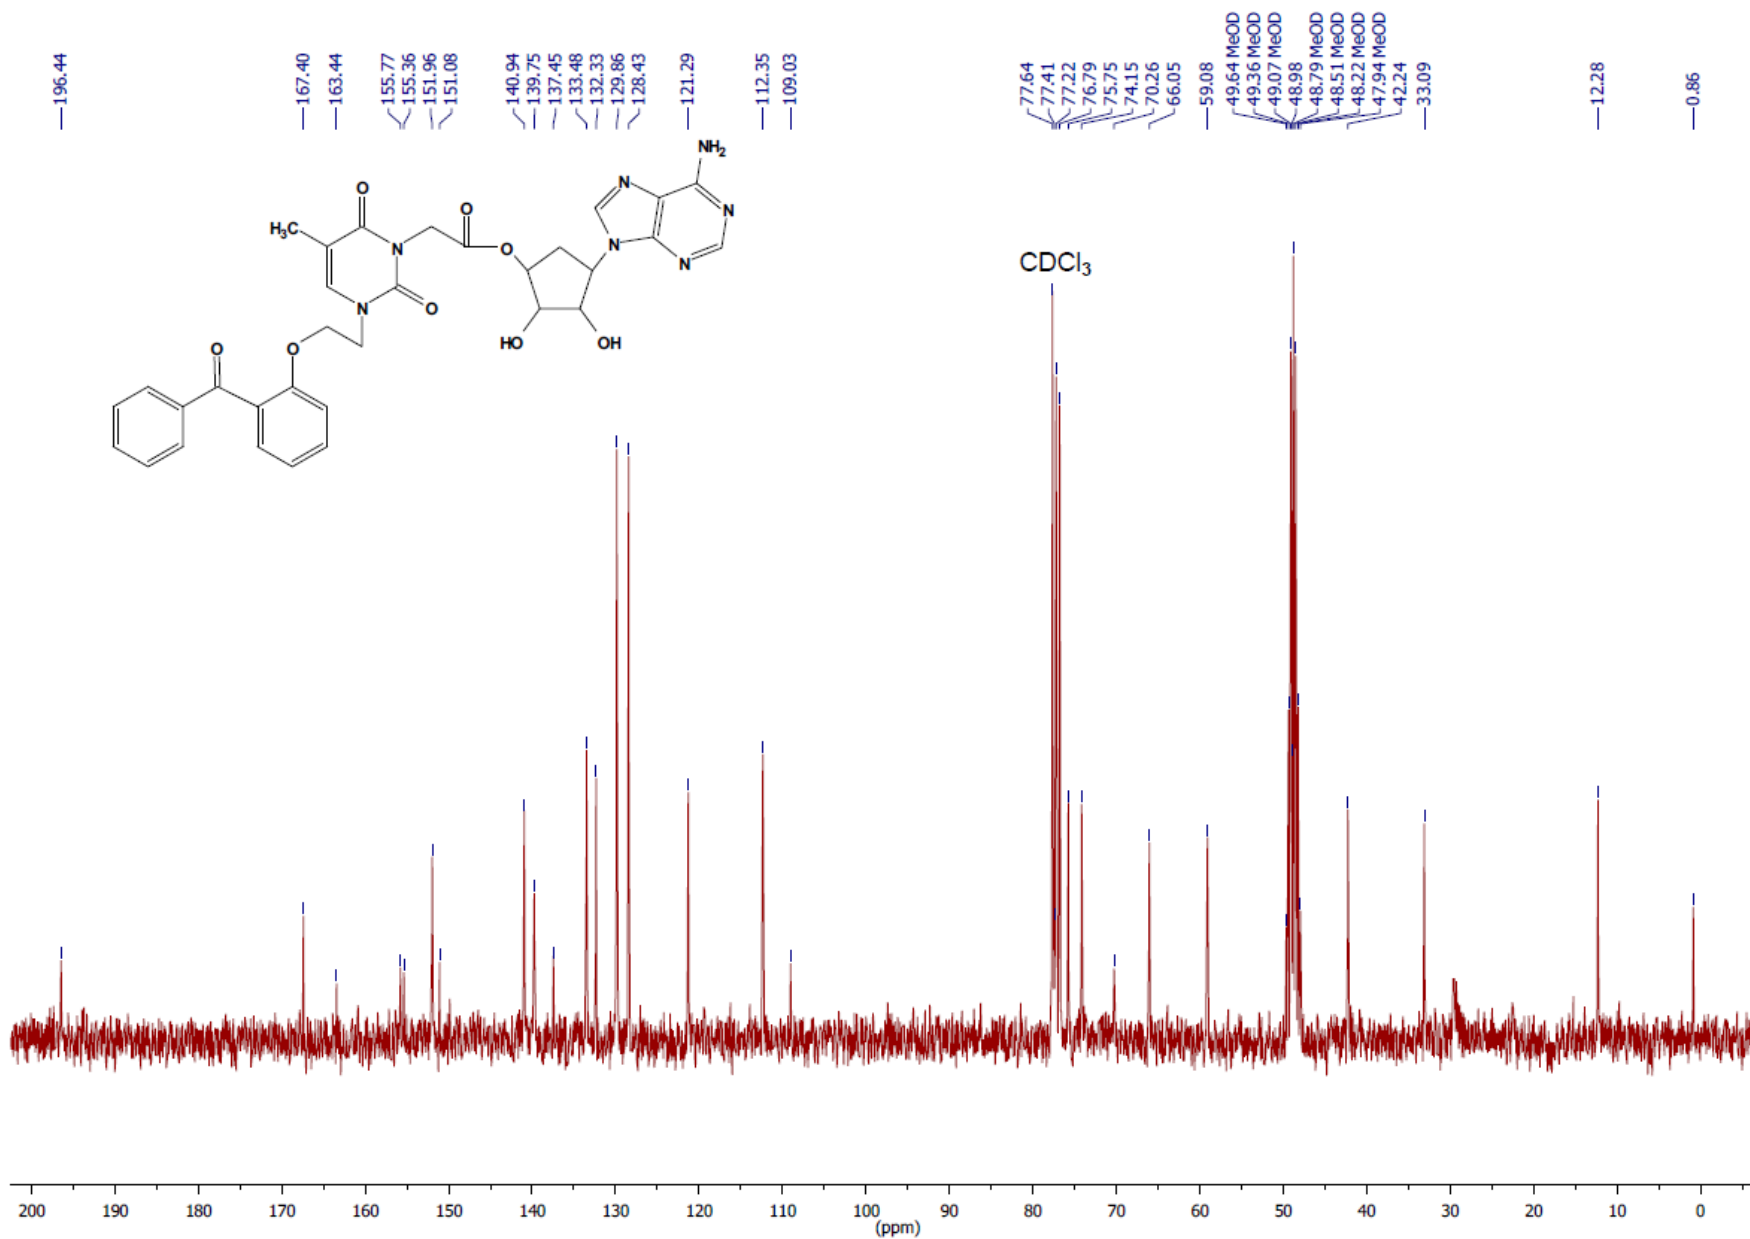

**Figure S52.**  $^{13}\text{C}$  NMR spectrum of compound **3b** (in  $\text{CDCl}_3:\text{CD}_3\text{OD}$  at 100 MHz)

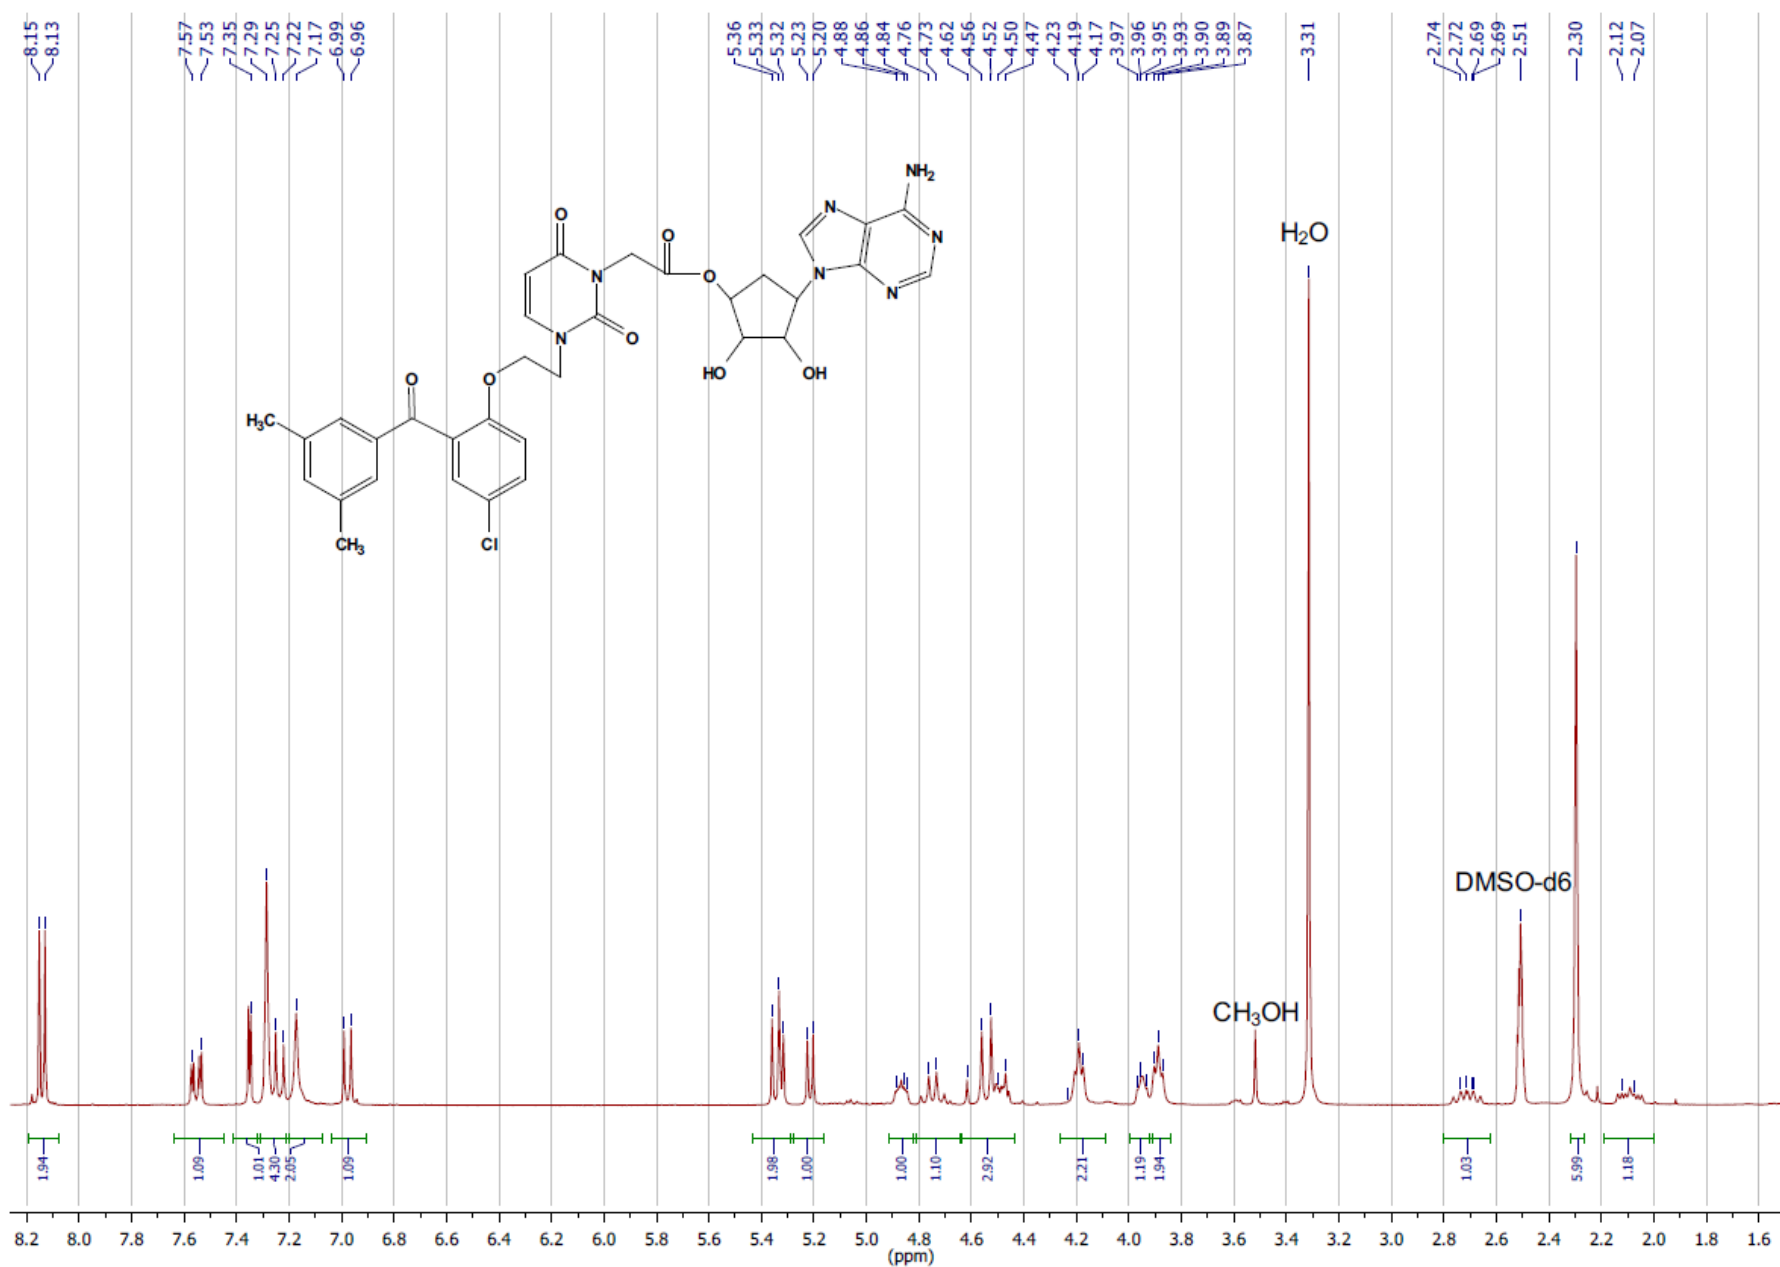

Figure S53. <sup>1</sup>H NMR spectrum of compound 3c (in DMSO-d<sub>6</sub> at 400 MHz)

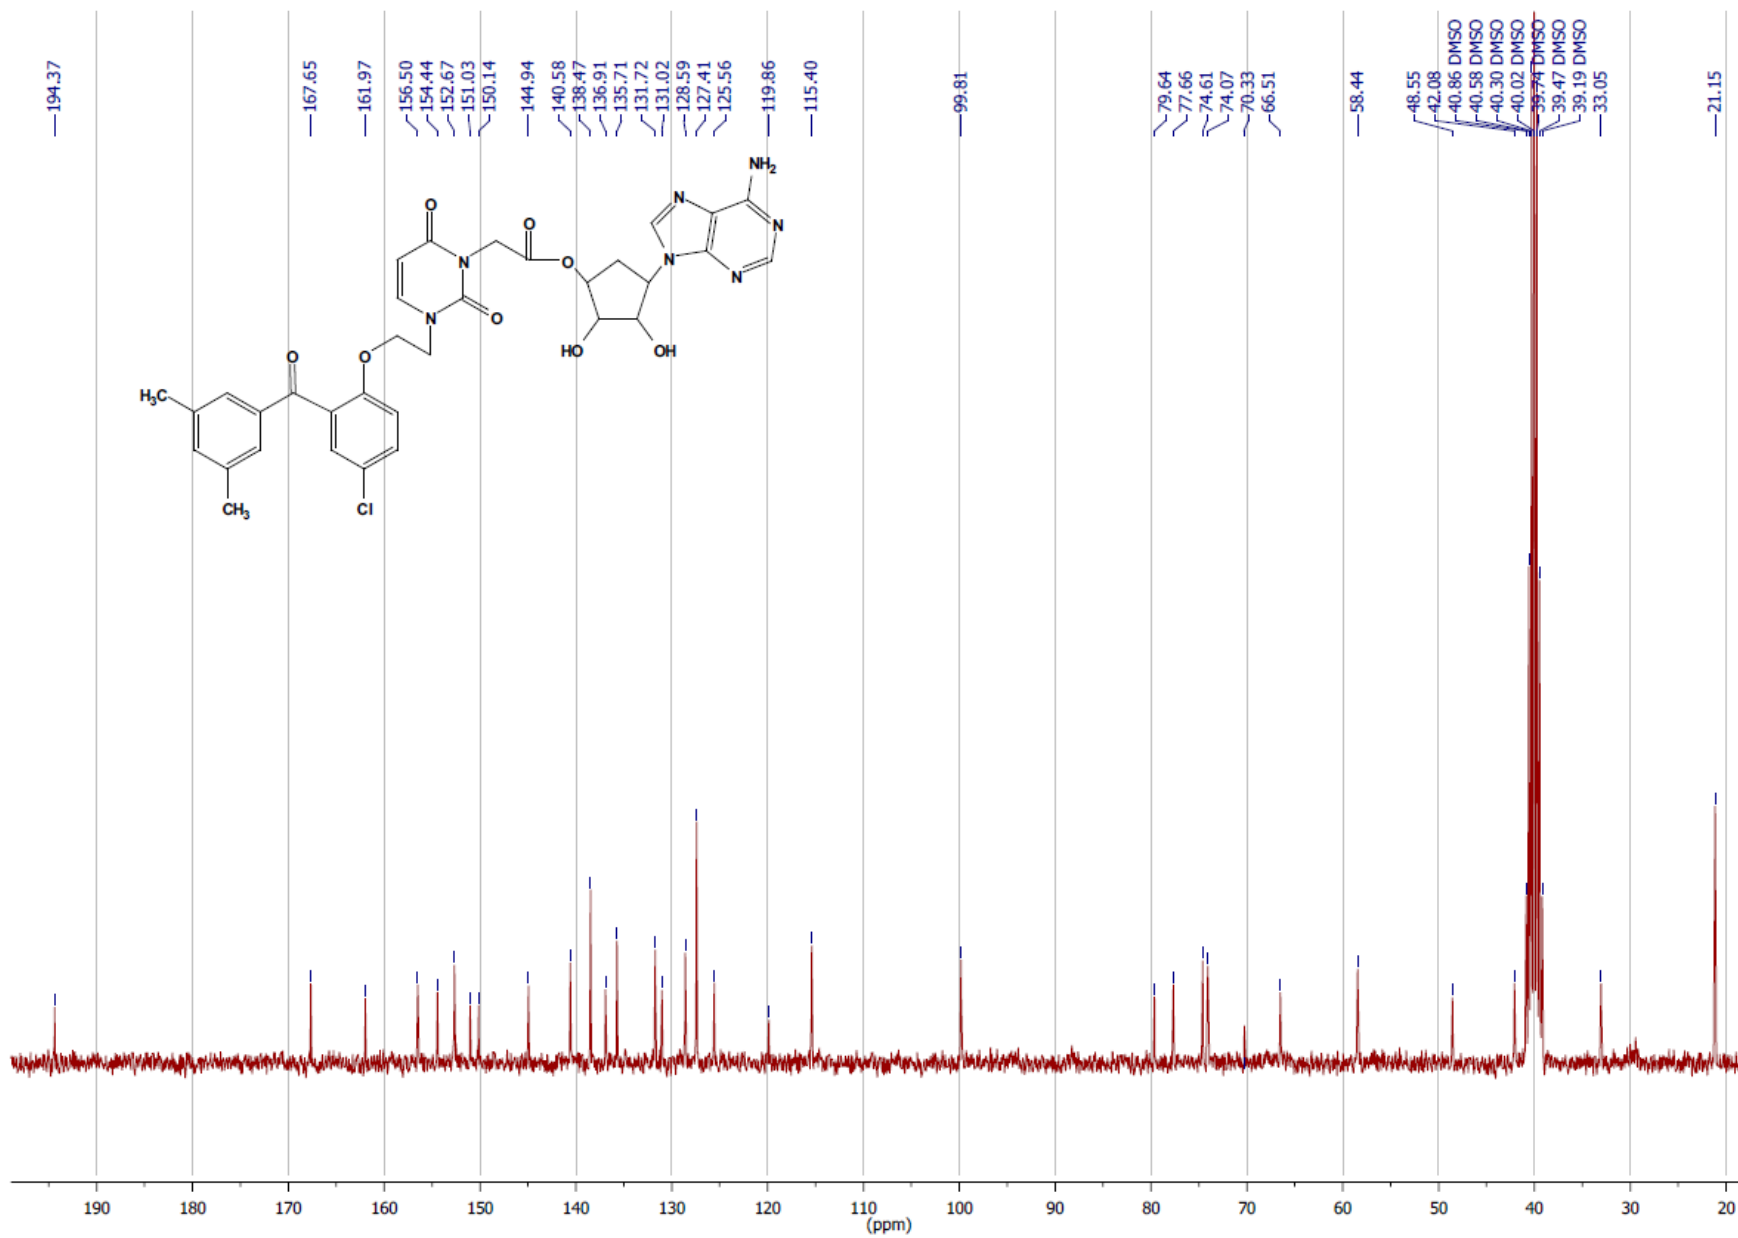

**Figure S54.**  $^{13}\text{C}$  NMR spectrum of compound 3c (in  $\text{DMSO-}d_6$  at 100 MHz)



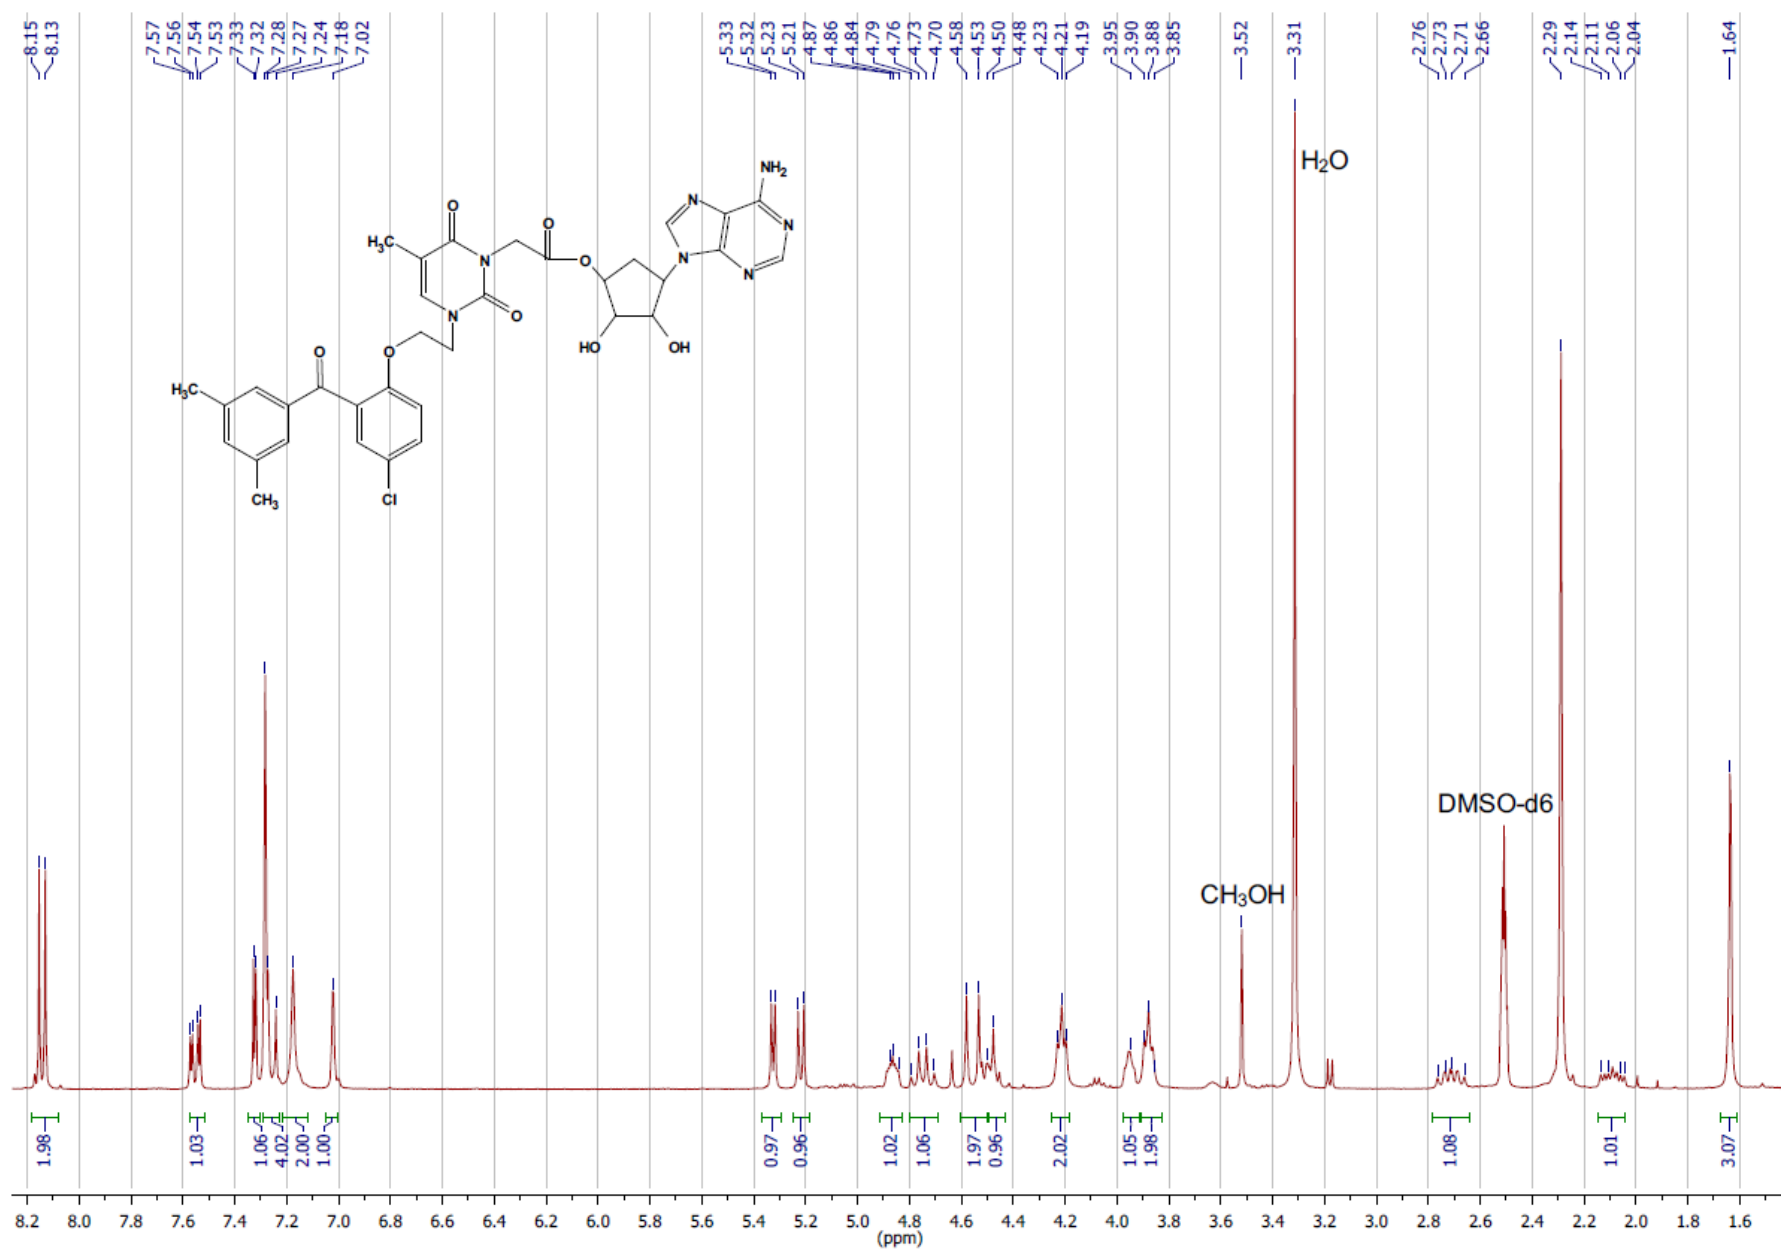

Figure S55. <sup>1</sup>H NMR spectrum of compound **3d** (in DMSO-d<sub>6</sub> at 400 MHz)

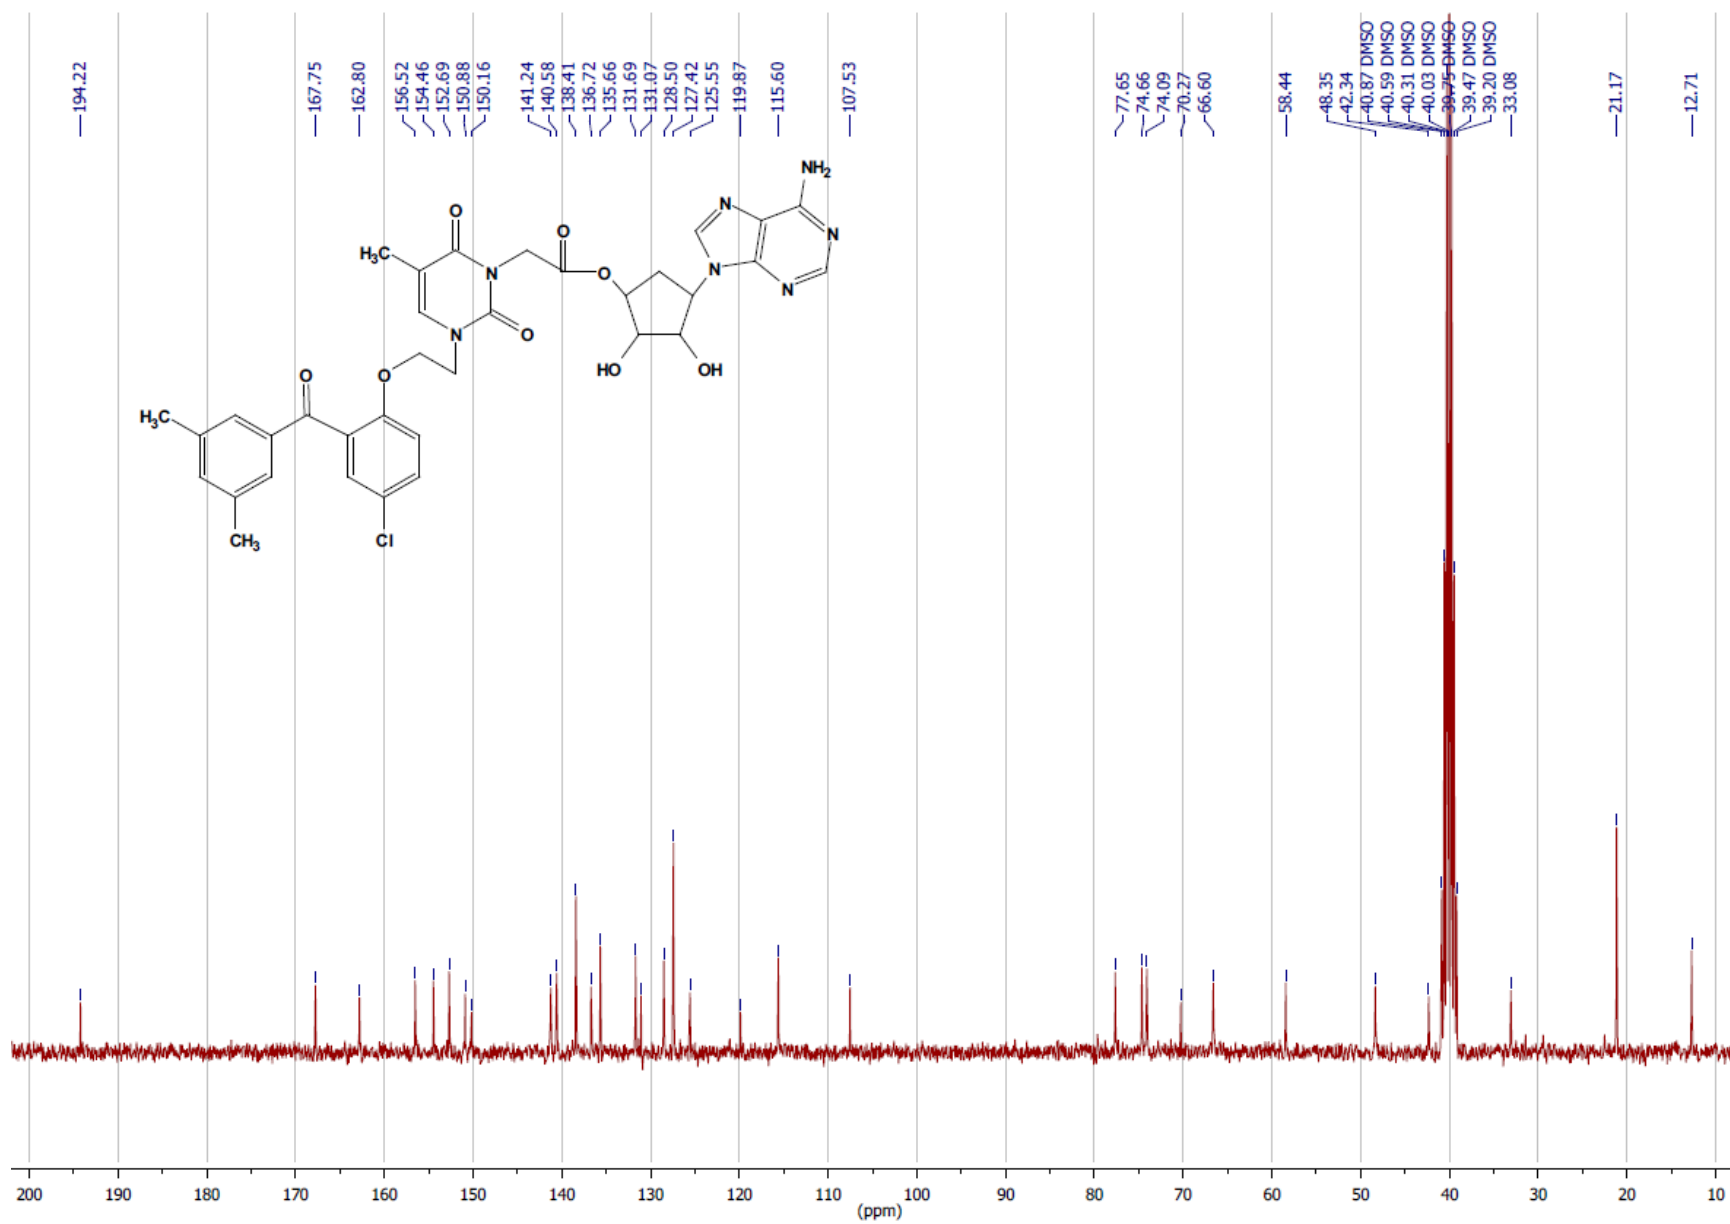

**Figure S56.**  $^{13}\text{C}$  NMR spectrum of compound **3d** (in  $\text{DMSO-}d_6$  at 100 MHz)
